# Supplementary material for: Oxidative stress in the oral cavity is driven by individual-specific bacterial communities
Source: NPJ Biofilms Microbiomes. 2018 Nov 27;4:29. doi: 10.1038/s41522-018-0072-3 (PMC6258756; doi:10.1038/s41522-018-0072-3)

## **Supplementary Information for:**

# **Oxidative stress in the oral cavity is driven by individual-specific bacterial communities**

Authors:

Mária Džunková, Daniel Martinez-Martinez, Roman Gardlík , Michal Behuliak, Katarína

Janšáková, Nuria Jiménez, Jorge F. Vázquez-Castellanos, Jose Manuel Martí, Giuseppe D'Auria,

H.M.H.N. Bandara, Amparo Latorre, Peter Celec, Andrés Moya

This Additional Files supplement includes:

|                              |             |
|------------------------------|-------------|
| Supplementary Figure S1..... | page 2      |
| Supplementary Figure S2..... | page 3      |
| Supplementary Figure S3..... | page 4      |
| Supplementary Figure S4..... | page 4      |
| Supplementary Figure S5..... | pages 4-28  |
| Supplementary Figure S6..... | page 29     |
| Supplementary Figure S7..... | pages 30    |
| Supplementary Figure S8..... | pages 31-35 |

## Supplementary Figure S1:

Composition of the salivary microbiome of the 26 volunteers. Boxplots show the proportion of the eight most prevalent bacterial OTUs. The box represents middle 50% of scores which fall within the inter-quartile range, while median marks the mid-point.

**Streptococcus.0**

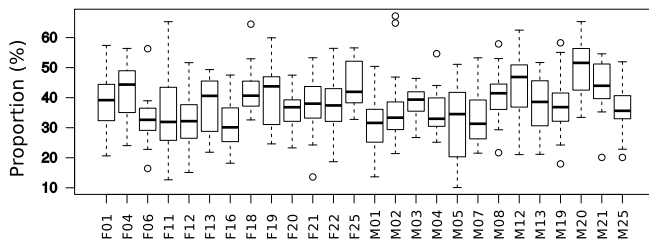

**Rothia.1**

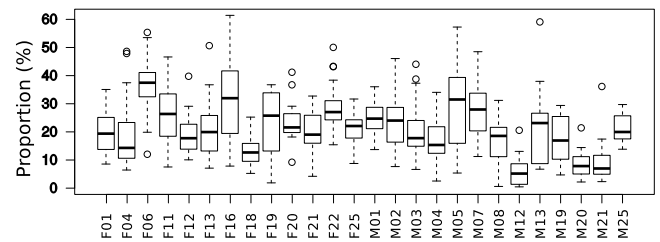

**Granulicatella.2**

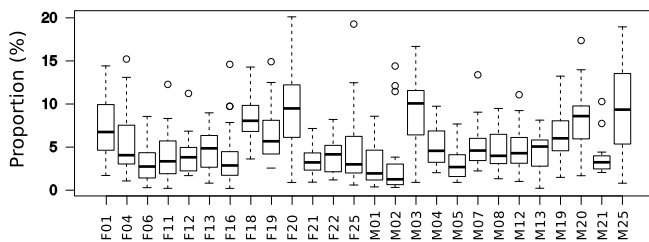

**Actinomyces.5**

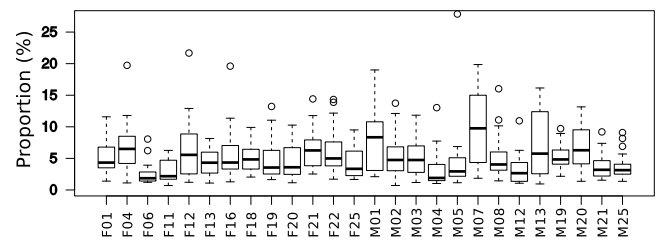

**Atopobium.3**

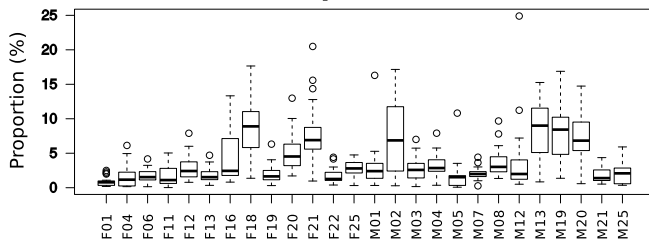

**Saccharibacteria.4**

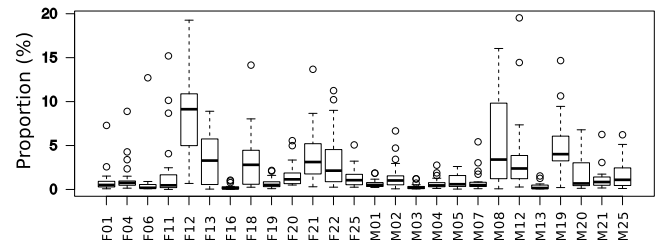

**Gemella.6**

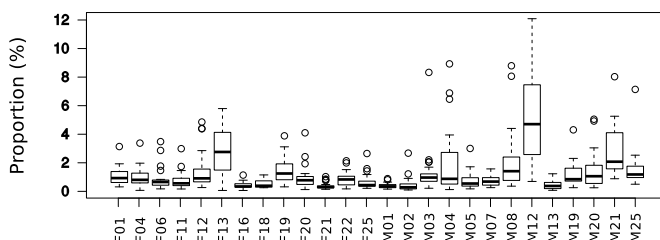

**Streptococcus.846**

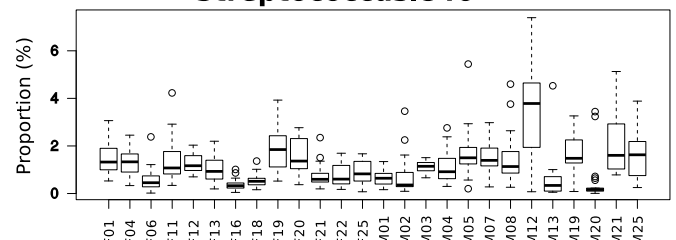

# Supplementary Figure S2:

In the canonical correspondence analysis plot, the bacterial composition of the 551 samples was tested to assess the fit with the “volunteer individuality” variable. All OTUs with average proportion > 0.001 % were included in the analysis. Samples from each volunteer are colored as indicated the figure legend. The graphics shows only those of the 50 most prevalent OTUs which had significant influence ( $p > 0.001$ ) on the ordination of samples.

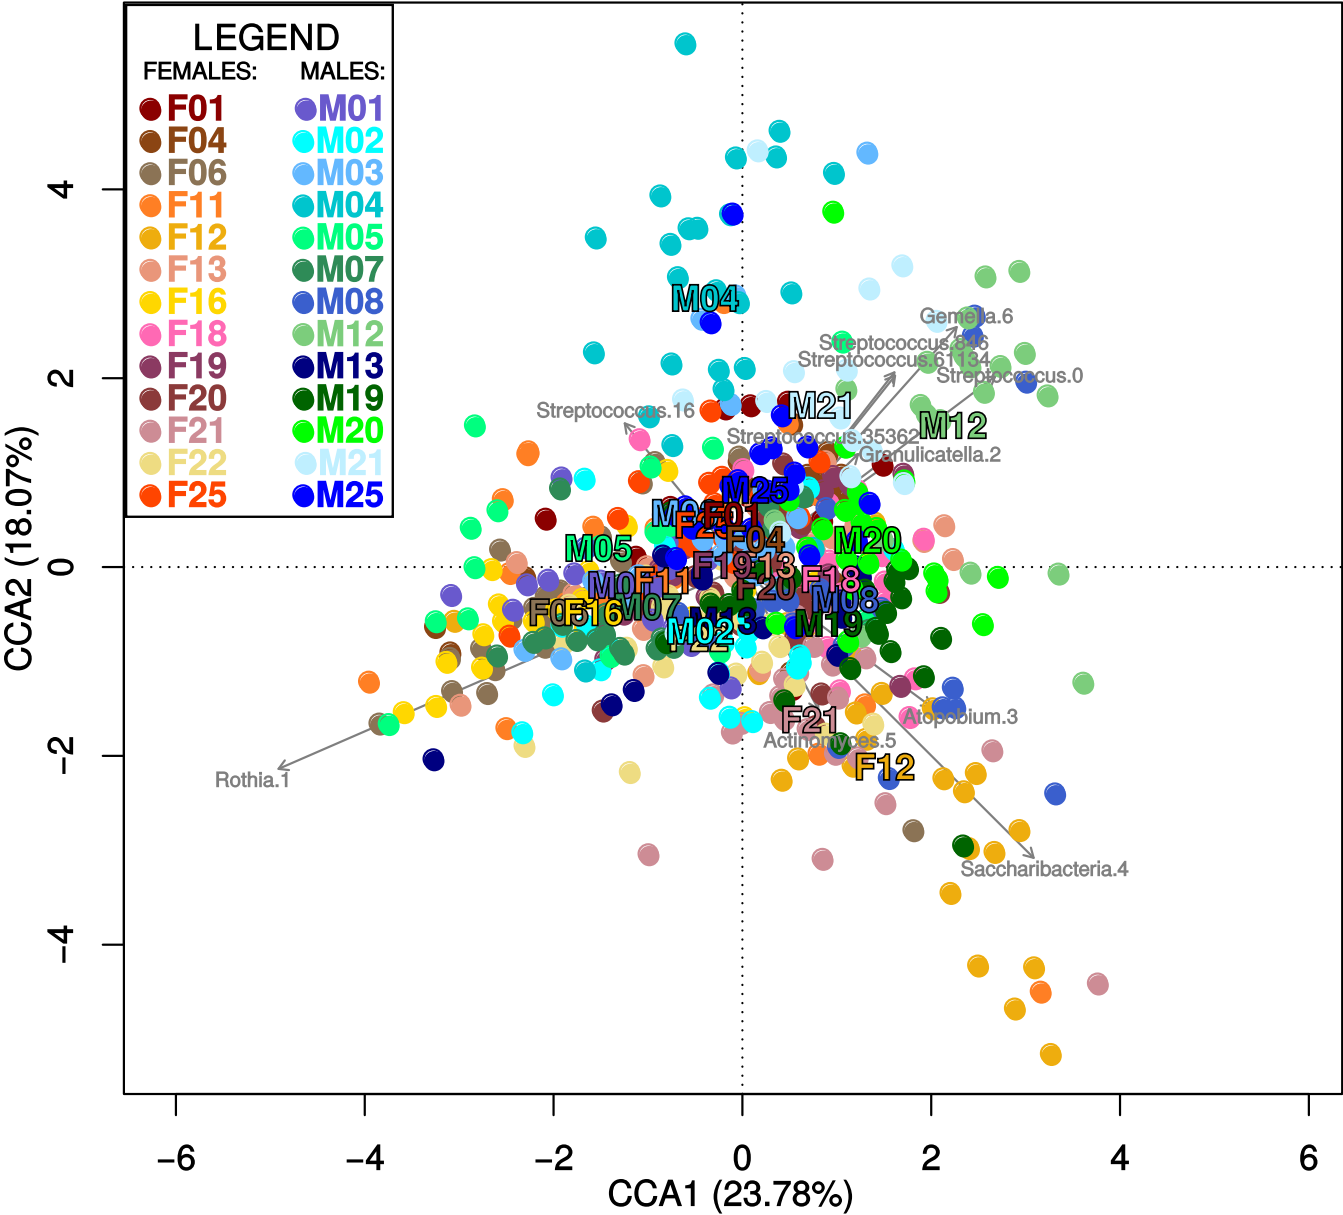

## Supplementary Figure S3:

Bixplots showing Shannon diversity index and evenness index for each of the volunteers. The box represents middle 50% of scores which fall within the inter-quartile range, while median marks the mid-point.

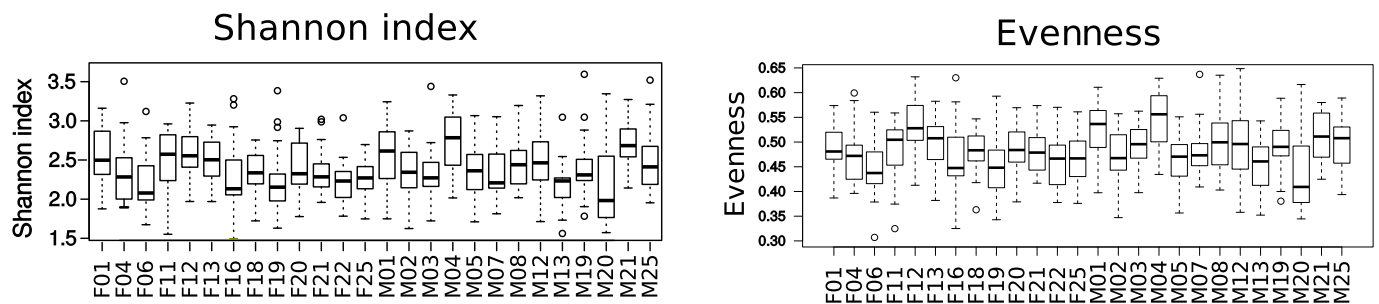

## Supplementary Figure S4:

Comparison of NMDS ordinations of the 551 saliva samples including all 18,146 OTUs, the OTUs with average proportion > 0.001 % (687 OTUs) and the OTUs with average proportion > 0.1 % (50 OTUs). These three ordination did not result to be significantly different ( $p < 0.001$ ).

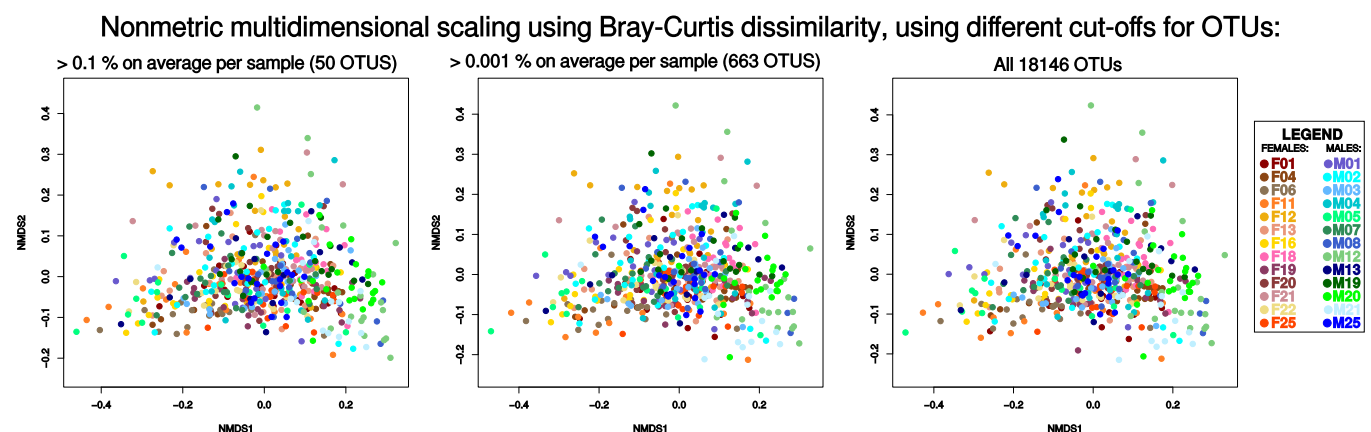

## Supplementary Figure S5:

Temporal variability of 50 most prevalent OTUs in the 24 volunteers. The volunteers F18 and F11 (the most and the less stable) are shown in the Figure 2.

F01: rank matrix & stability

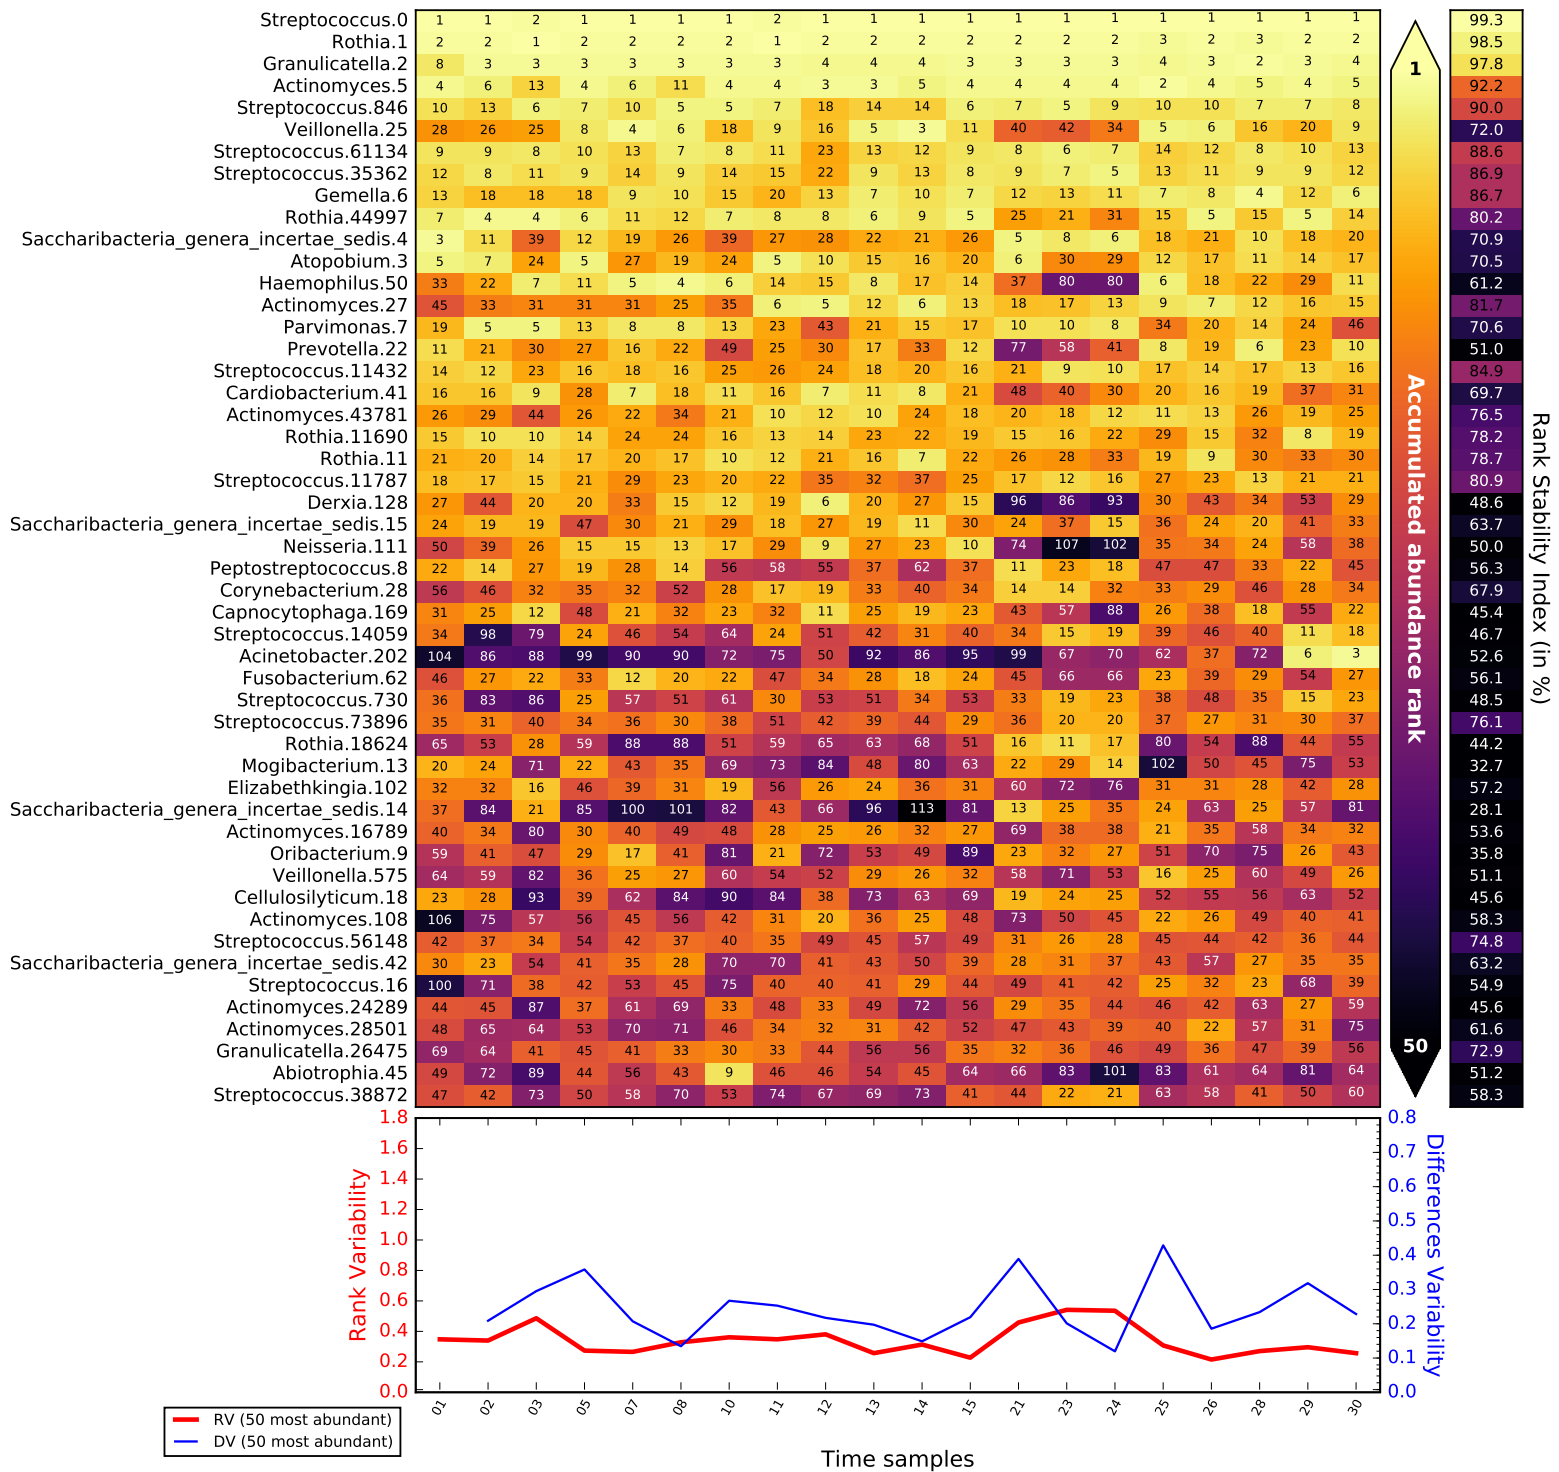

# F04: rank matrix & stability

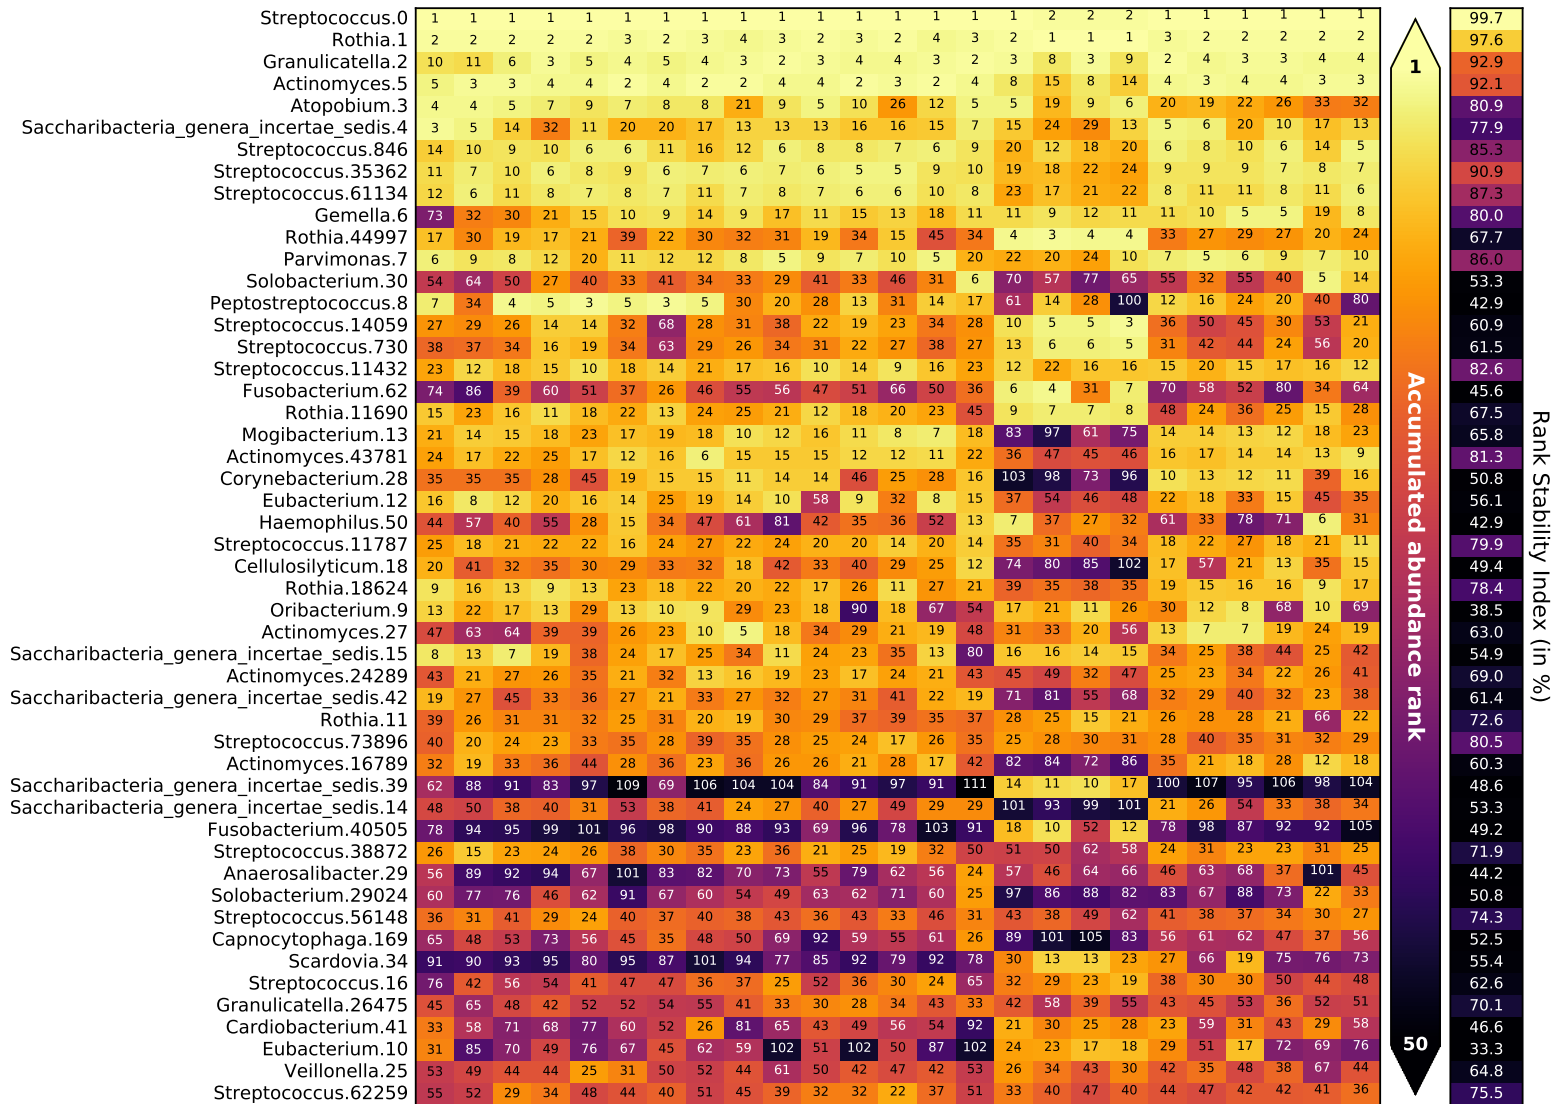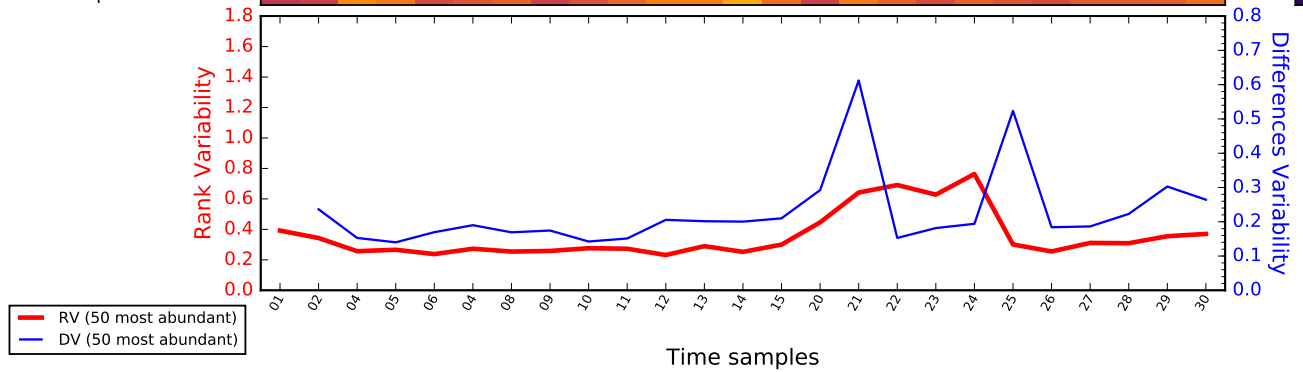

# F06: rank matrix & stability

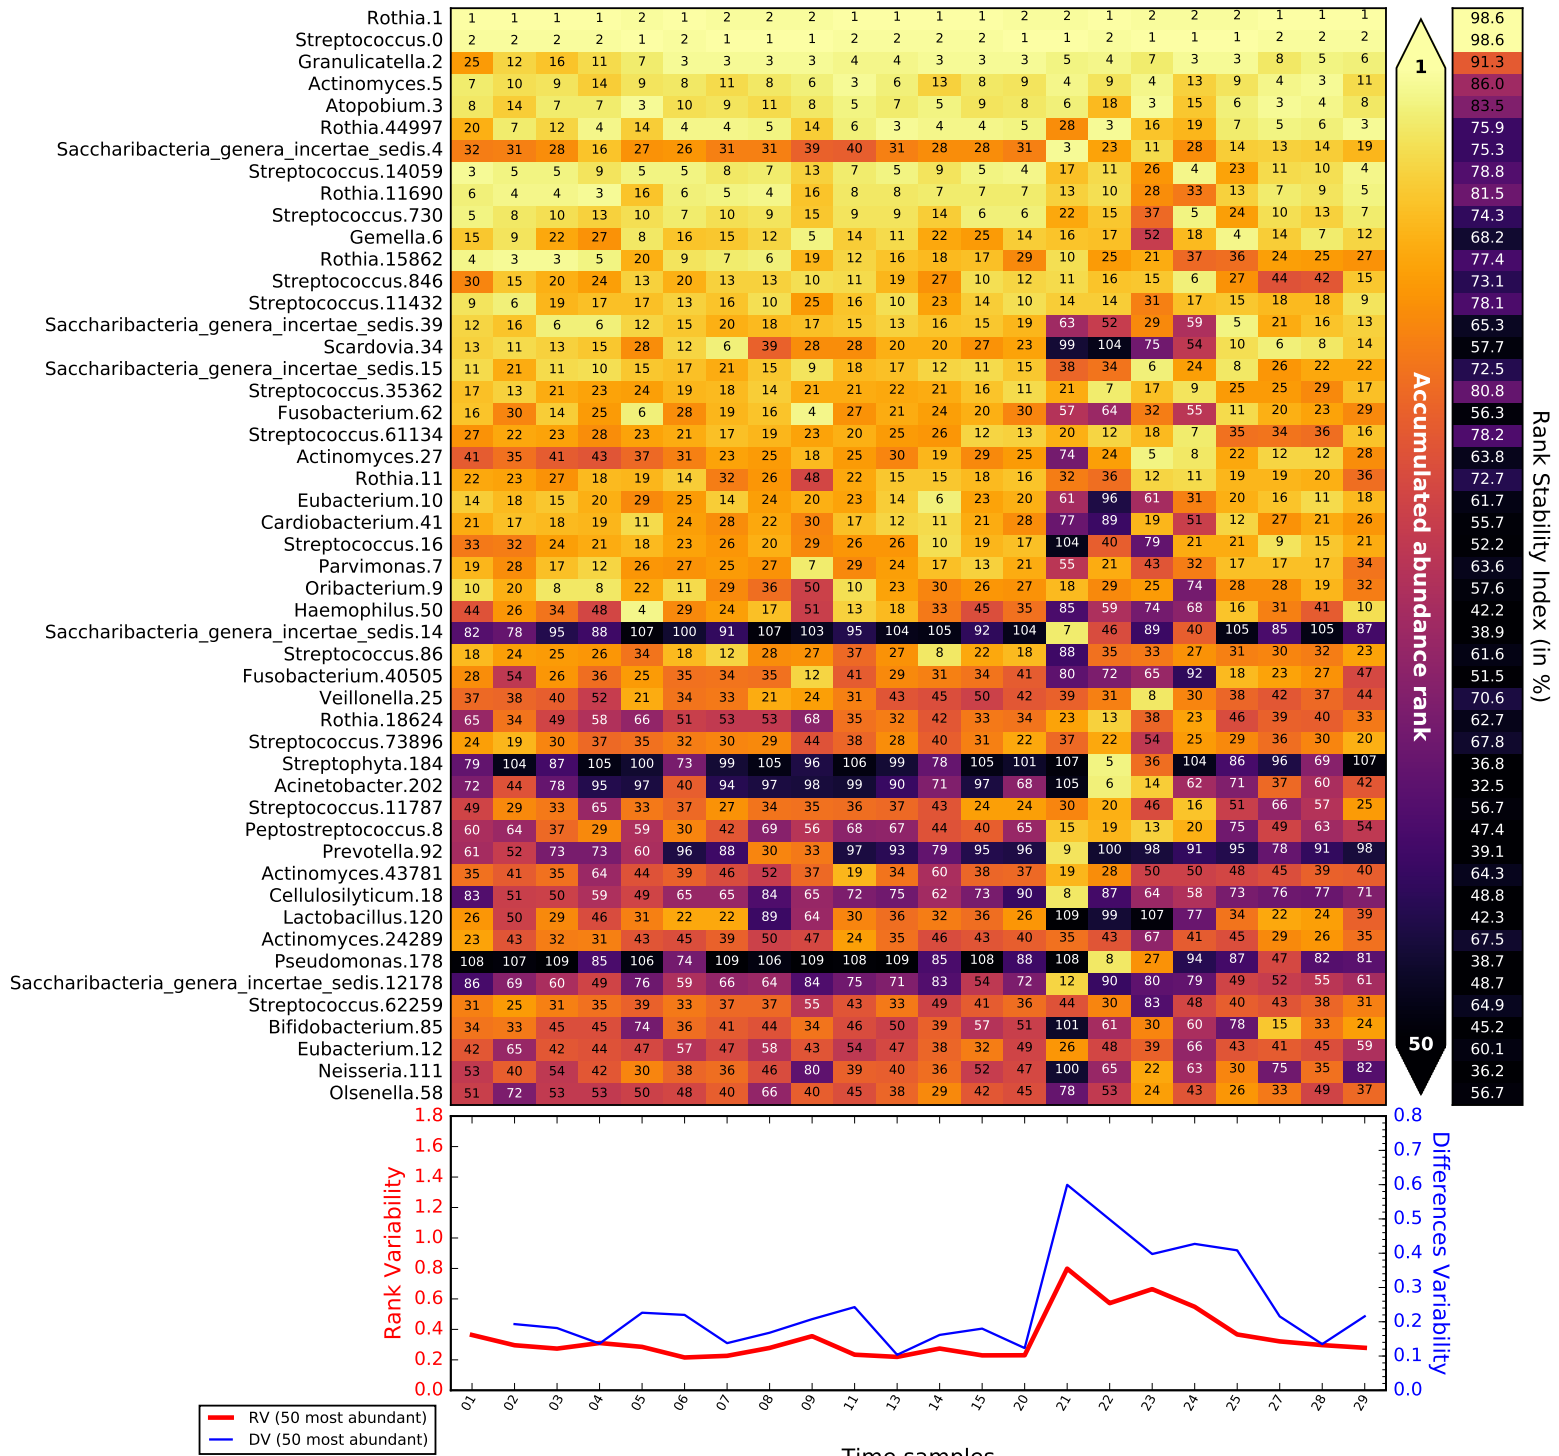

## F12: rank matrix & stability

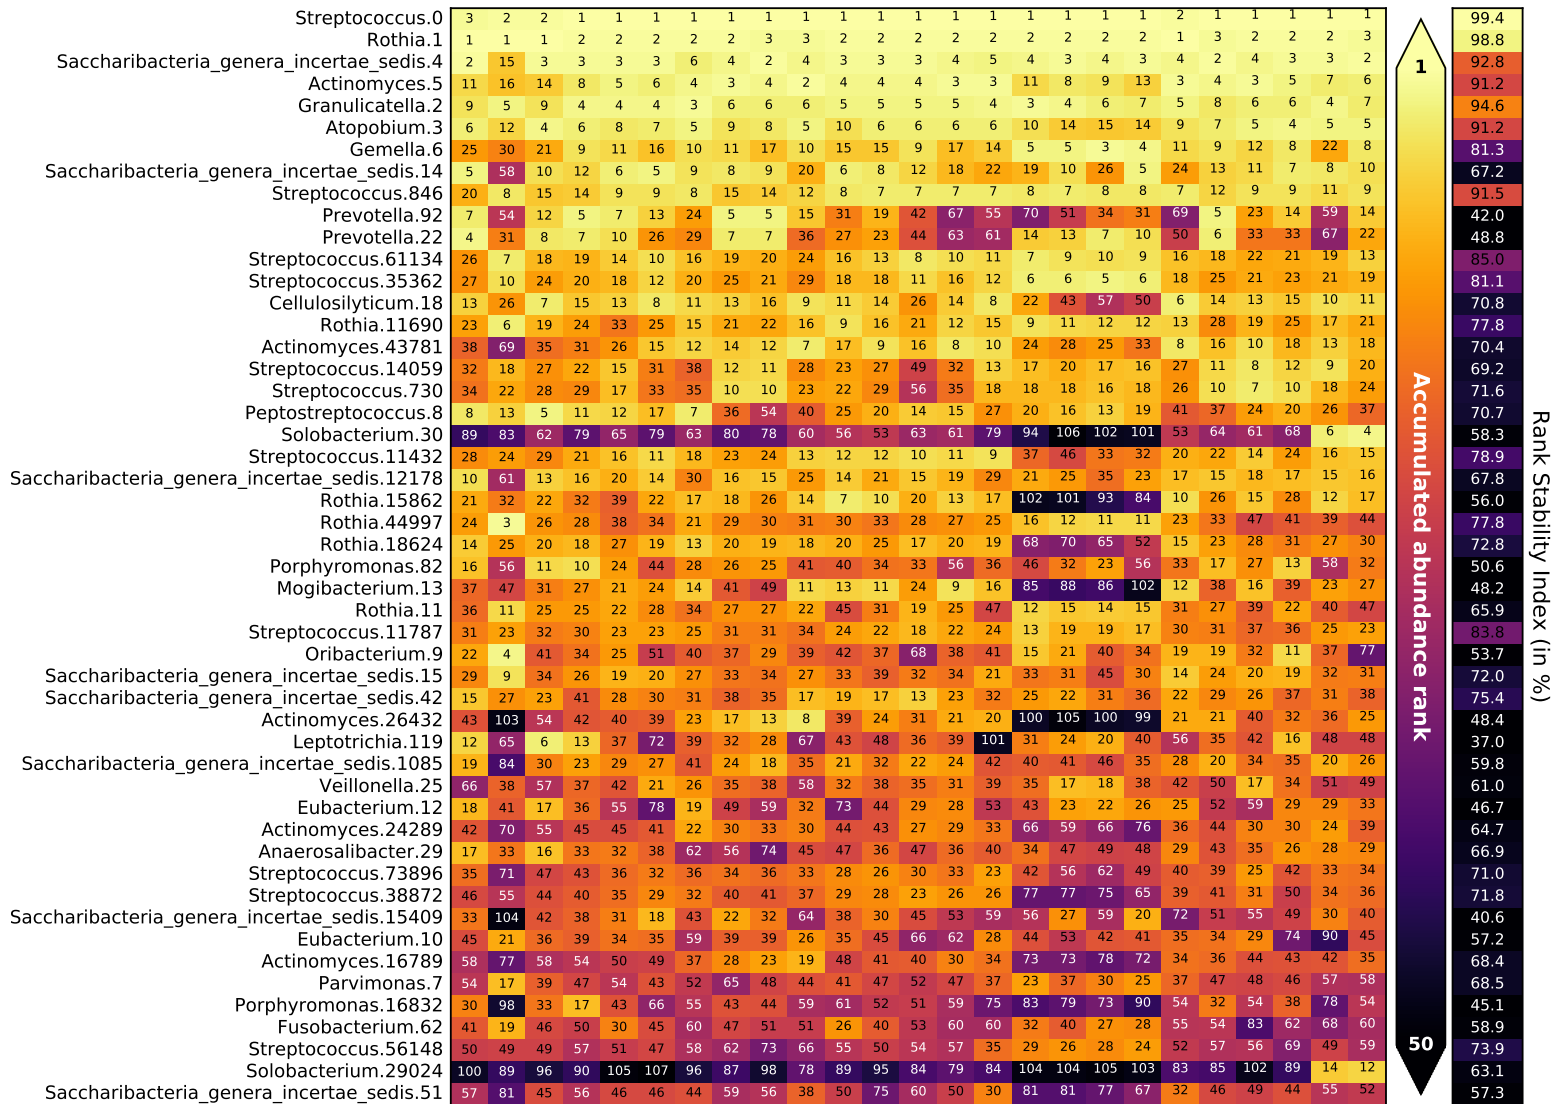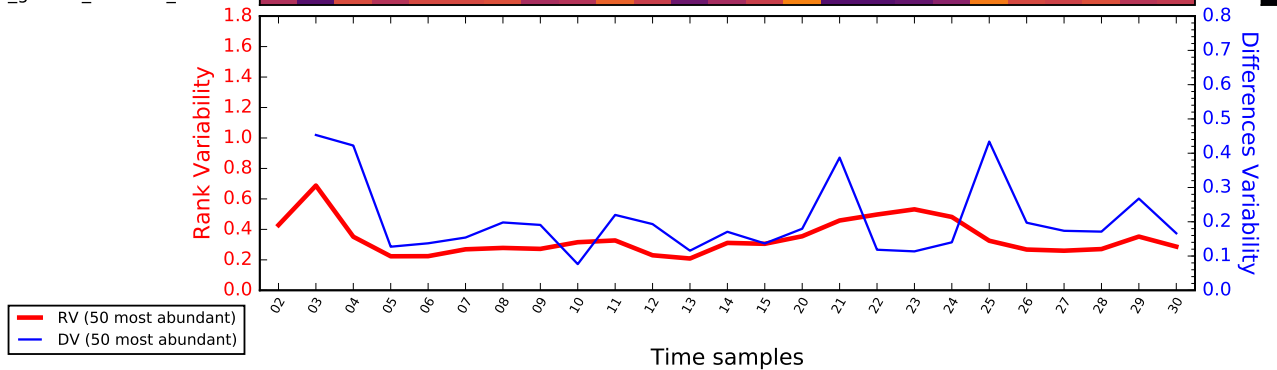

F13: rank matrix & stability

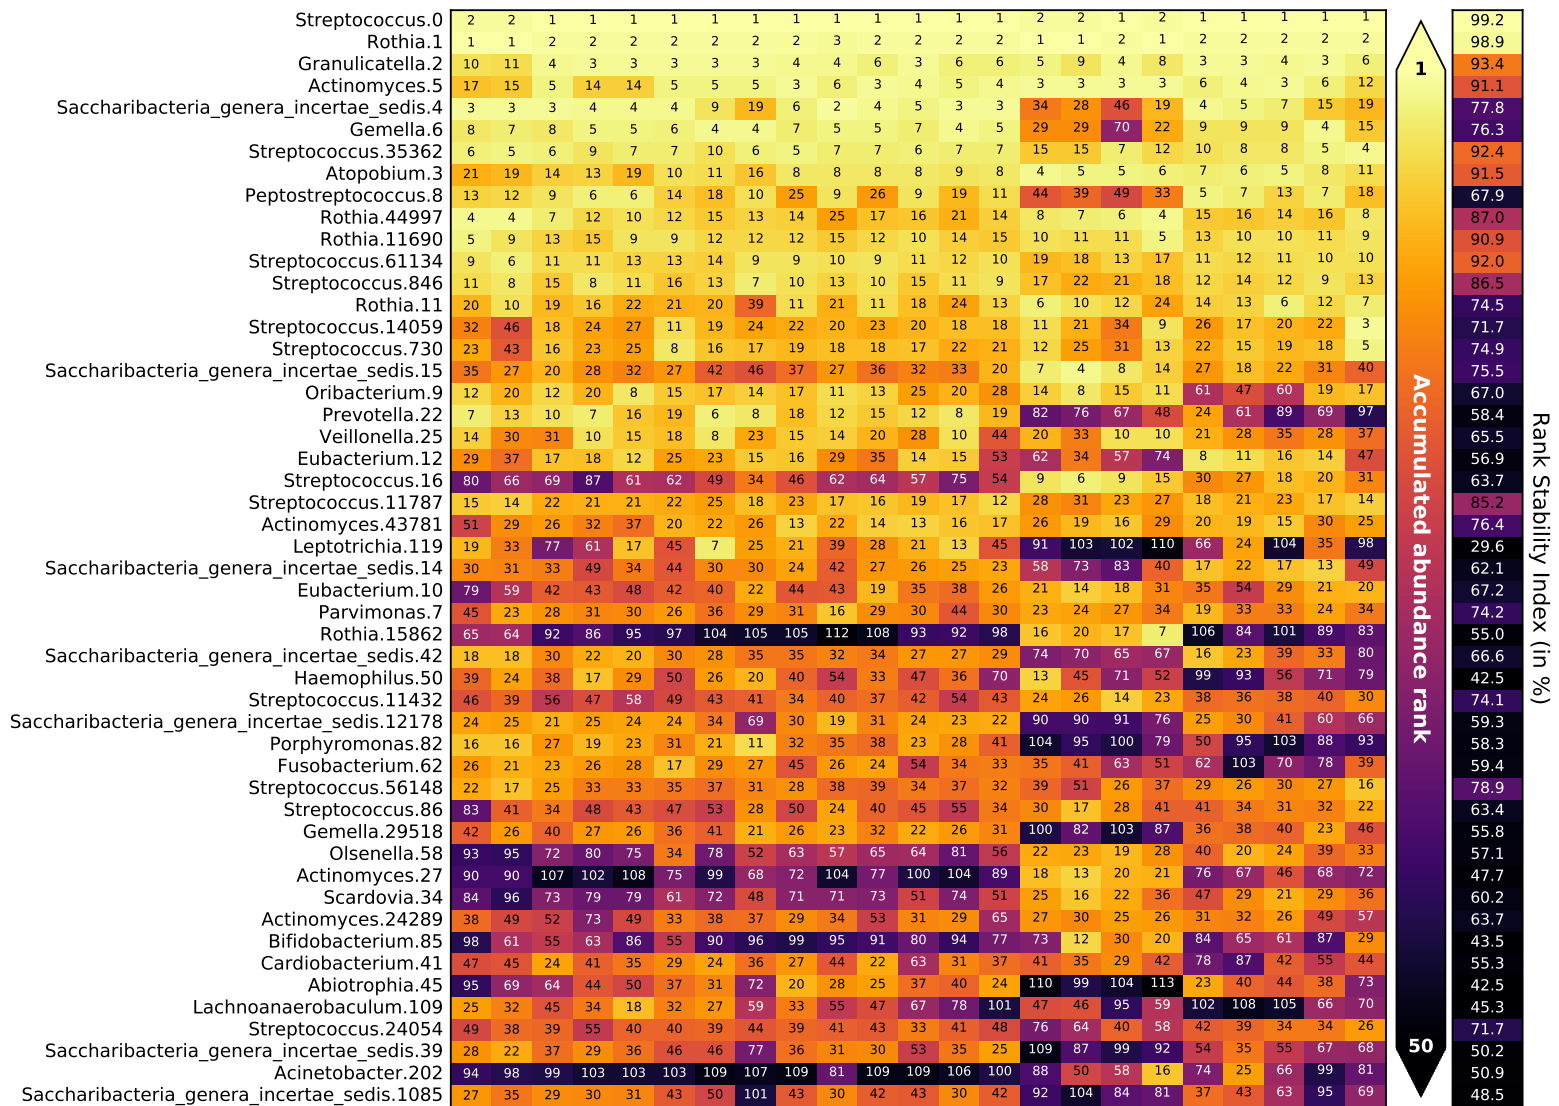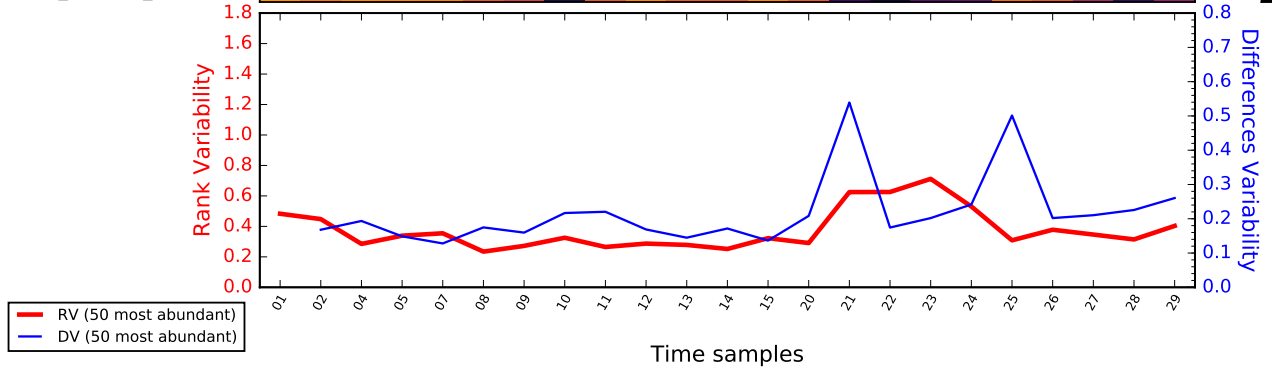

F16: rank matrix & stability

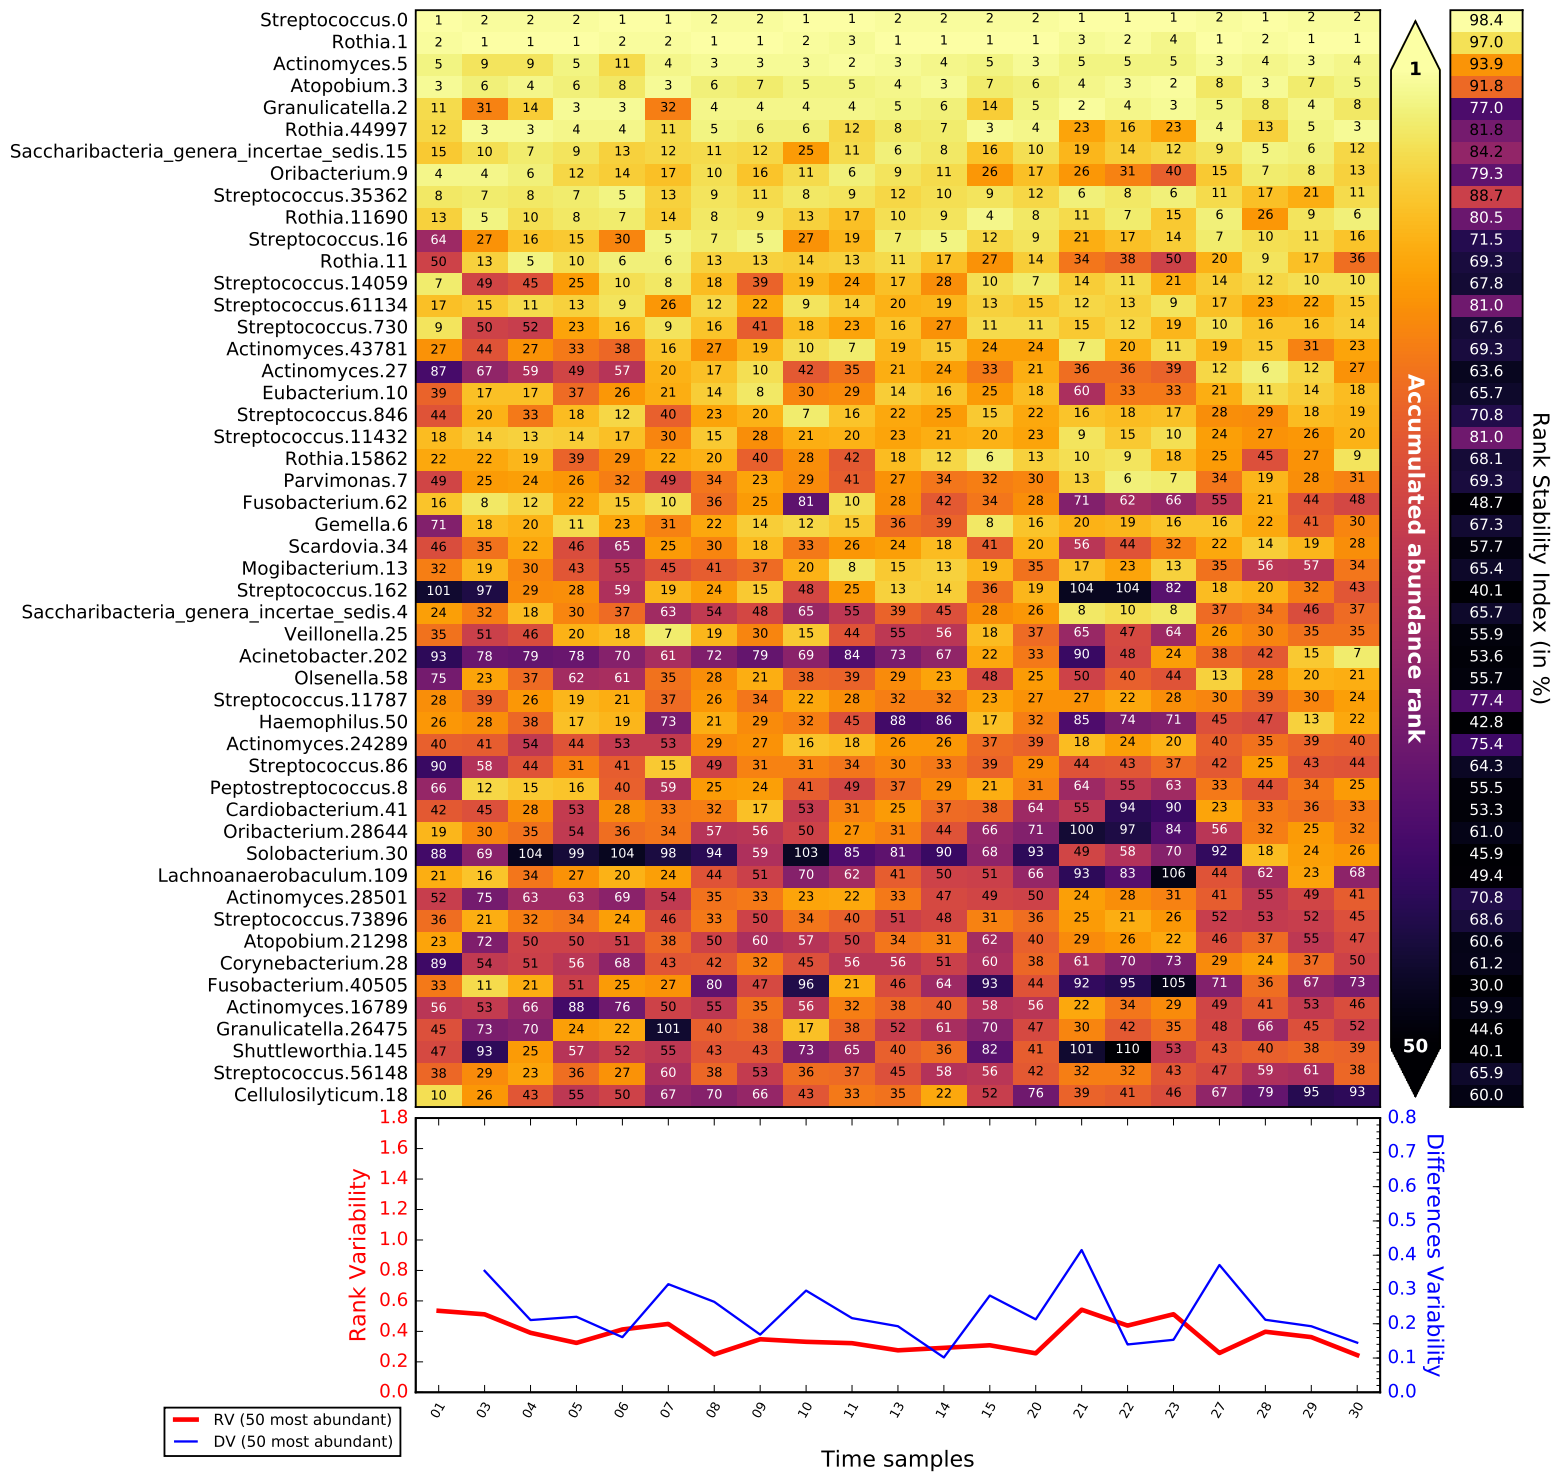

## F19: rank matrix & stability

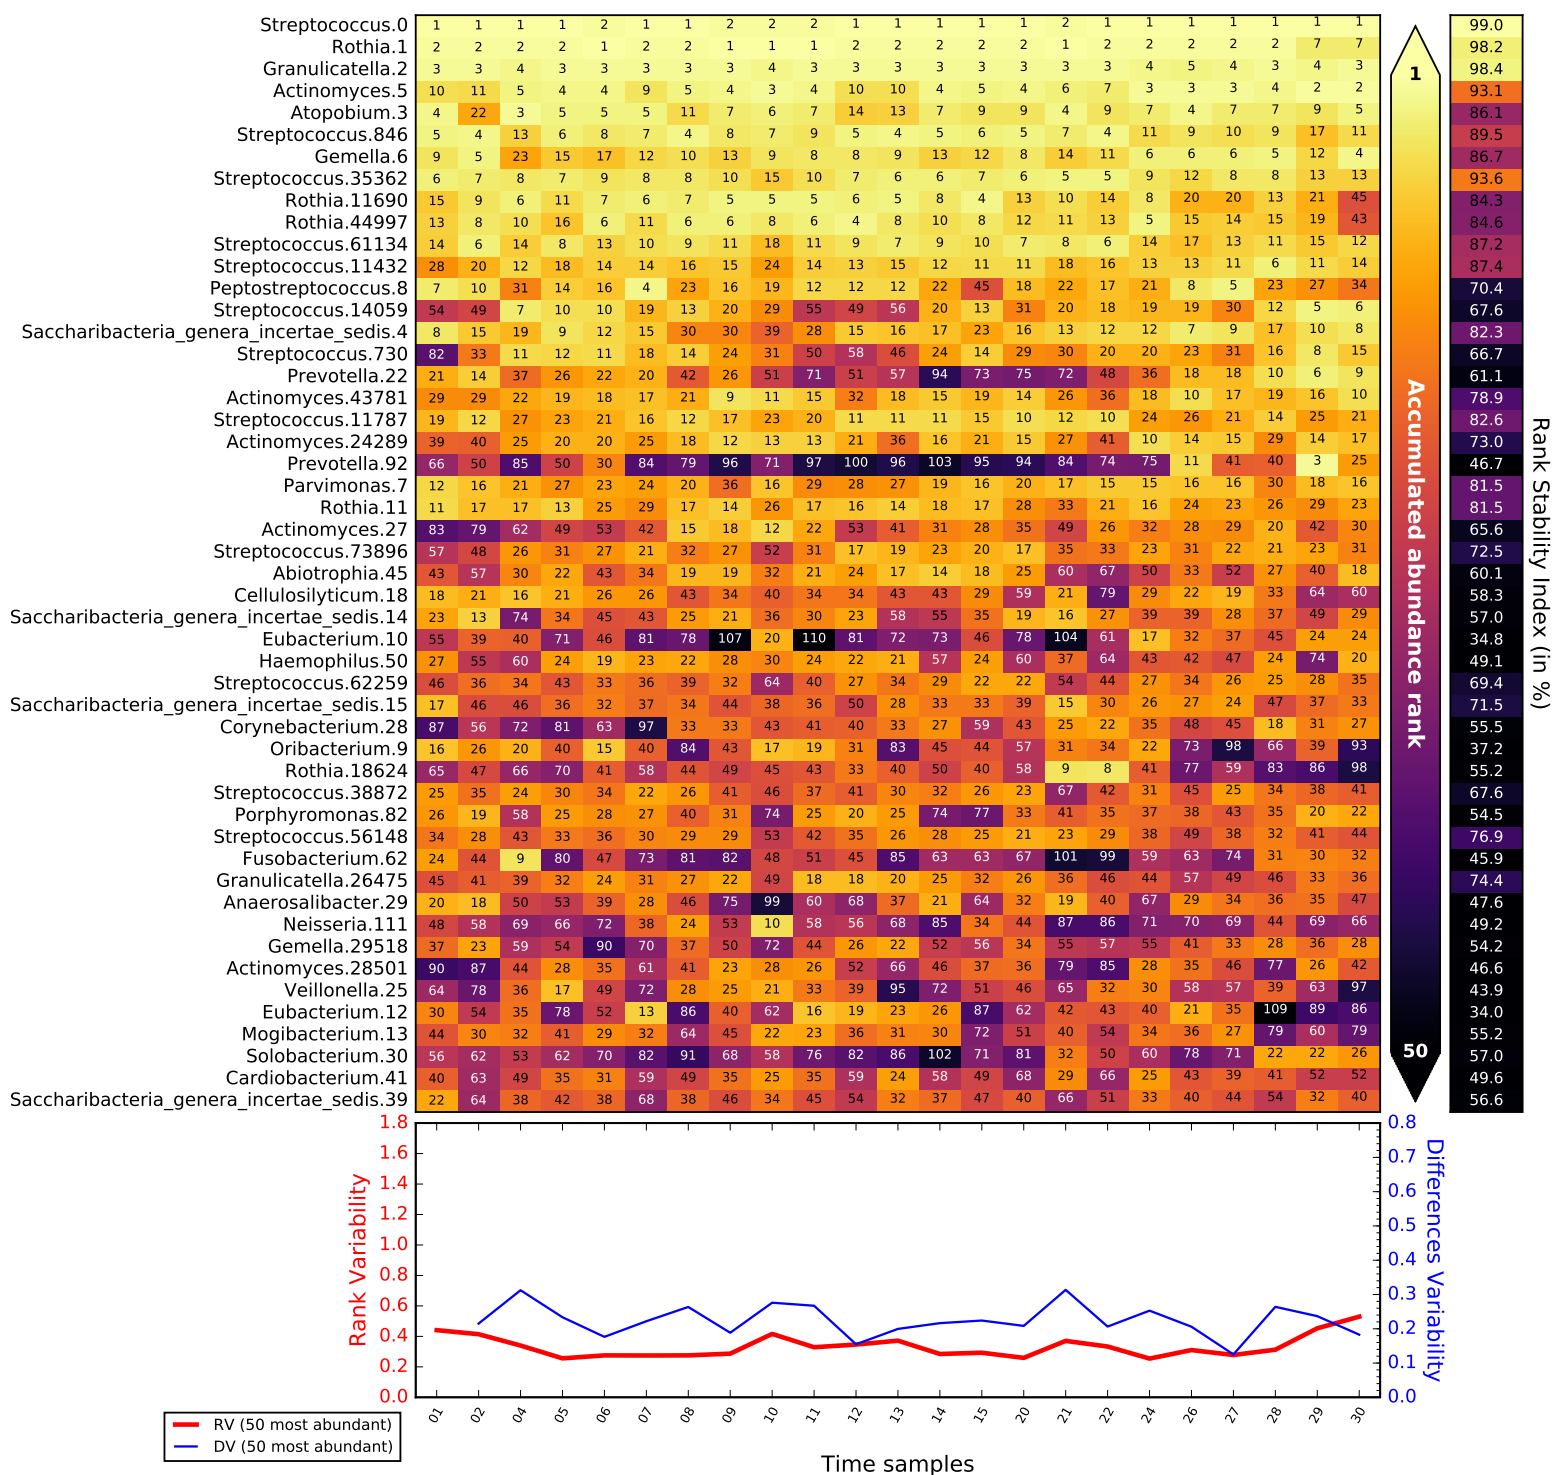

## F20: rank matrix & stability

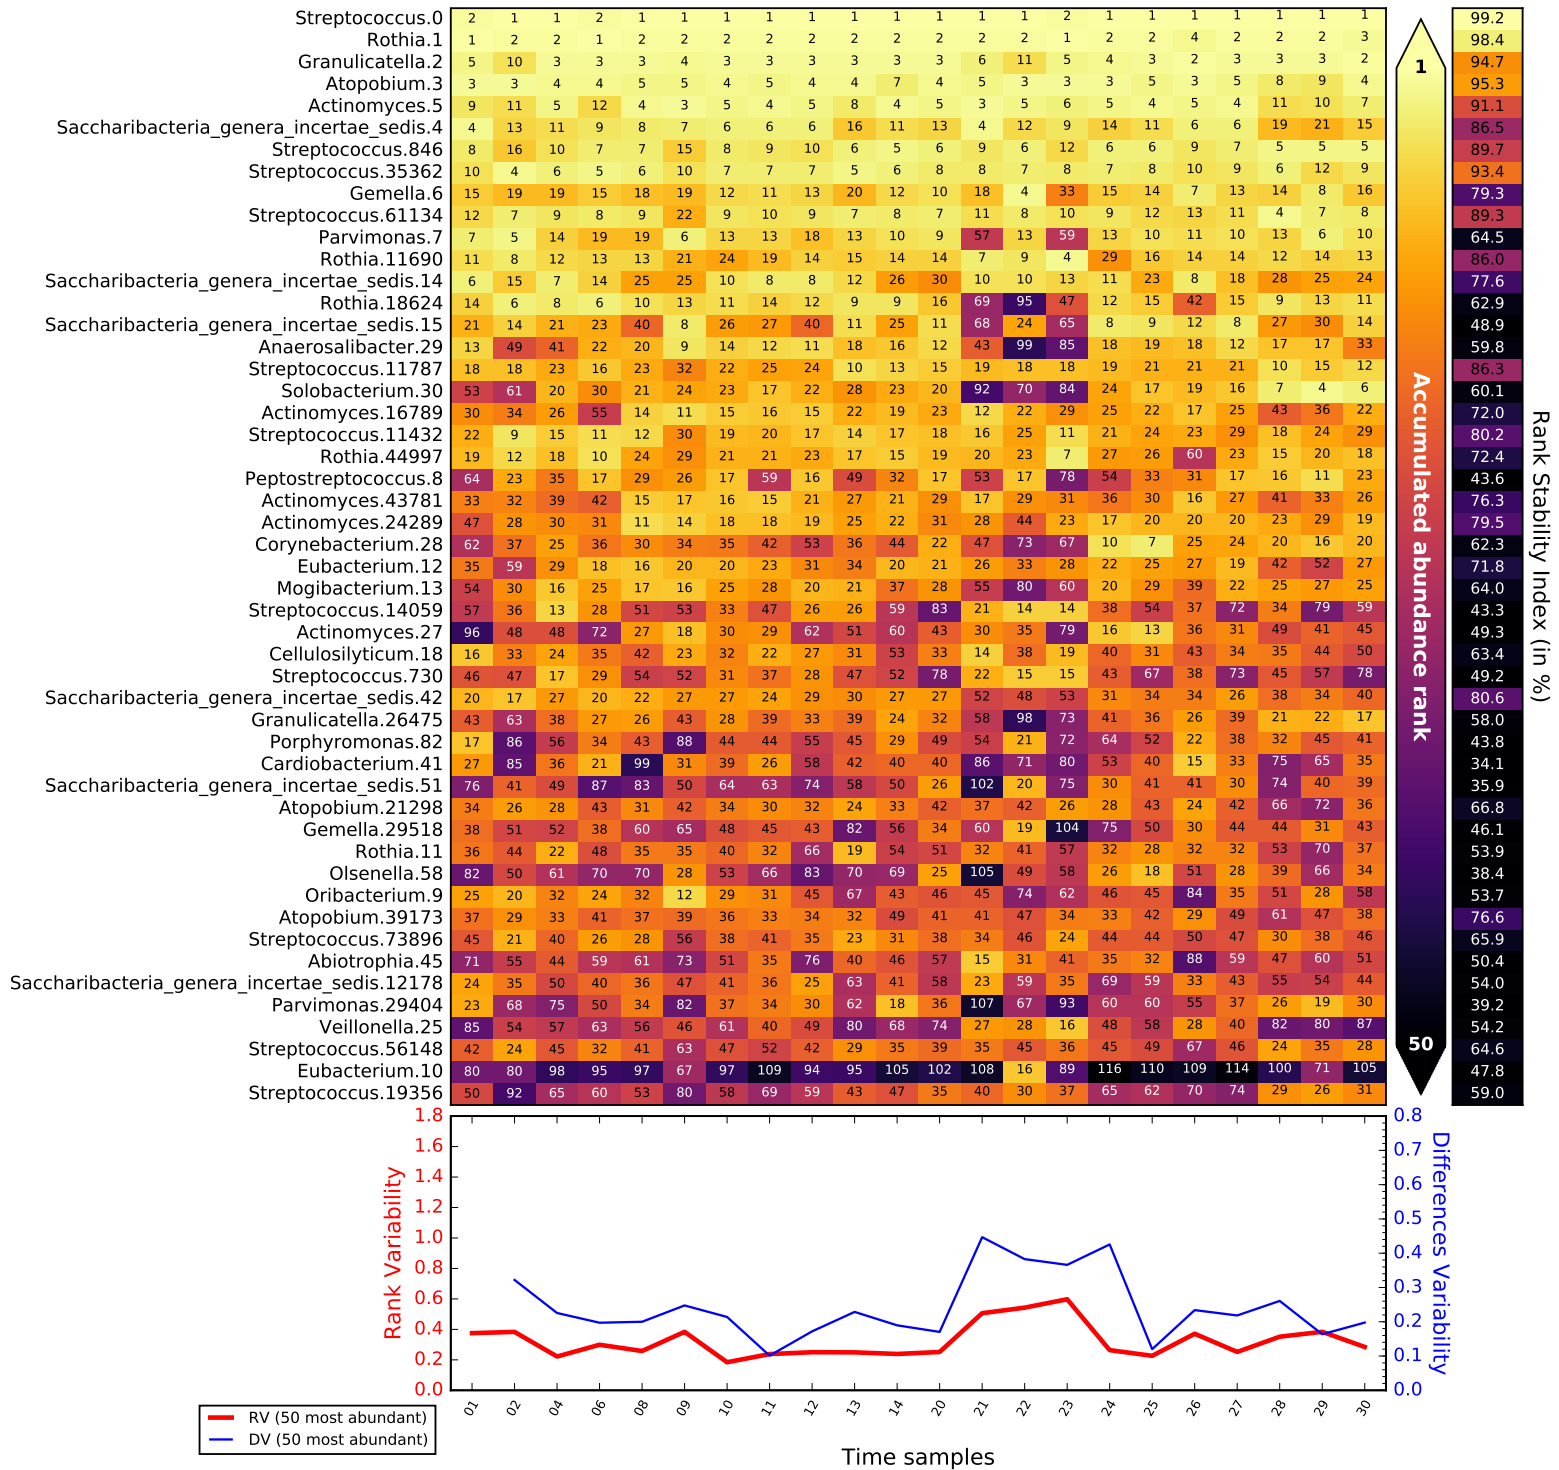

## F21: rank matrix & stability

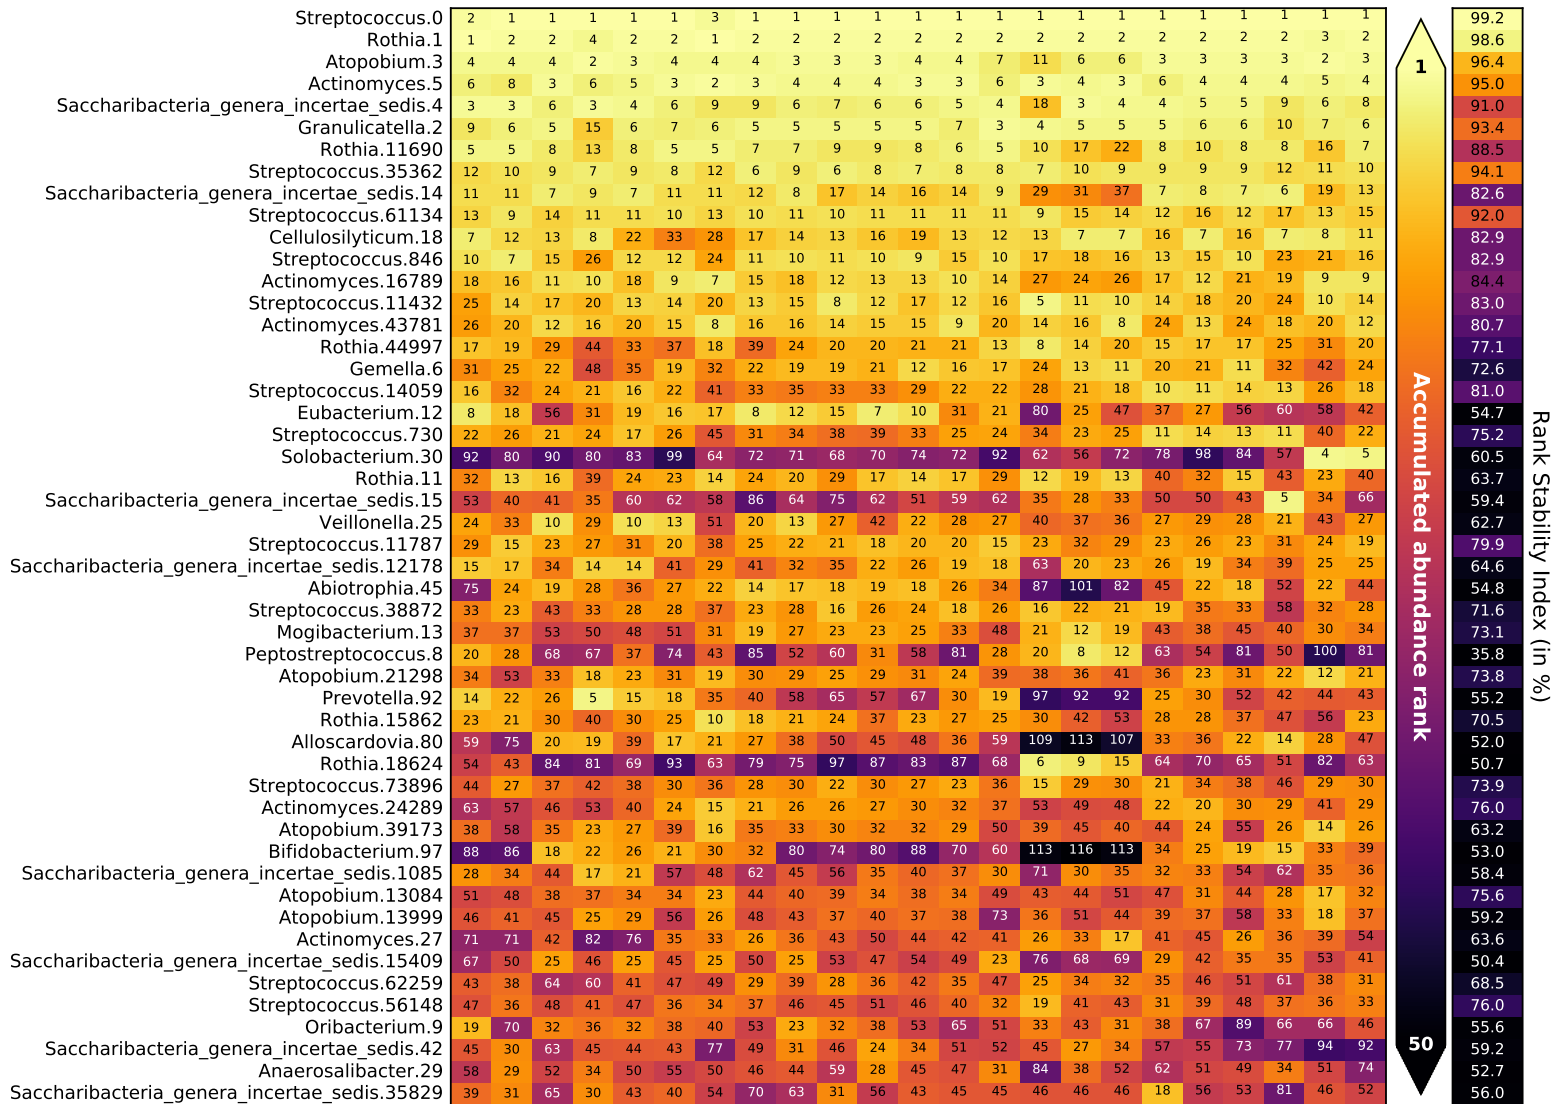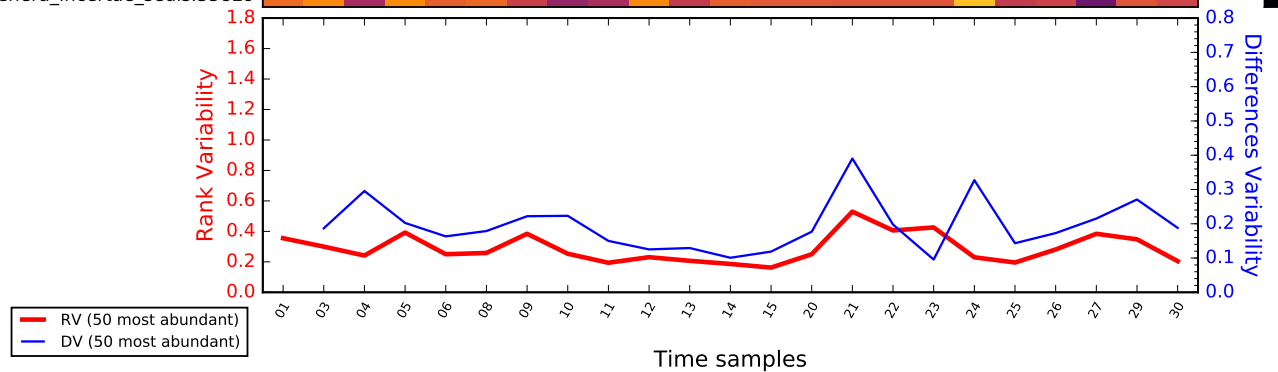

## F22: rank matrix & stability

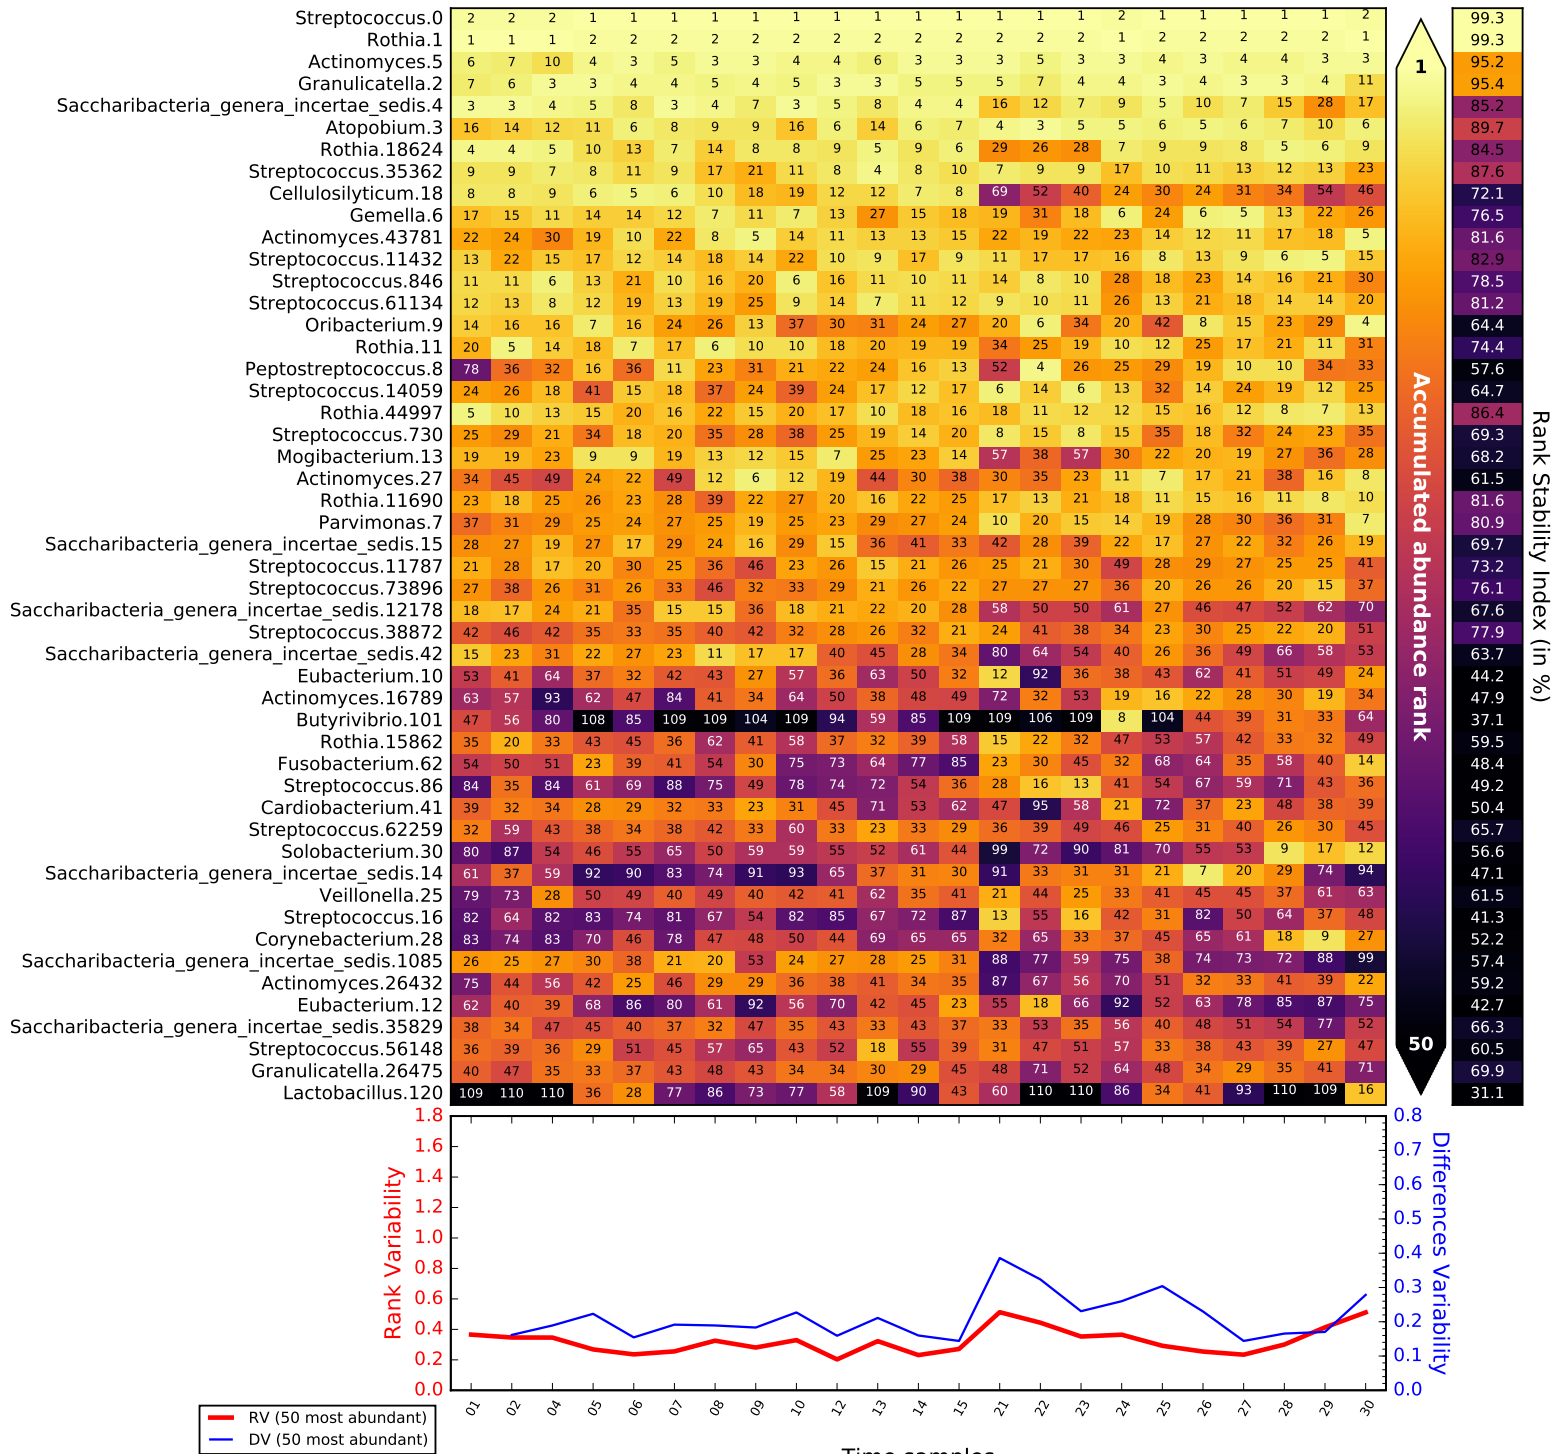

## F25: rank matrix & stability

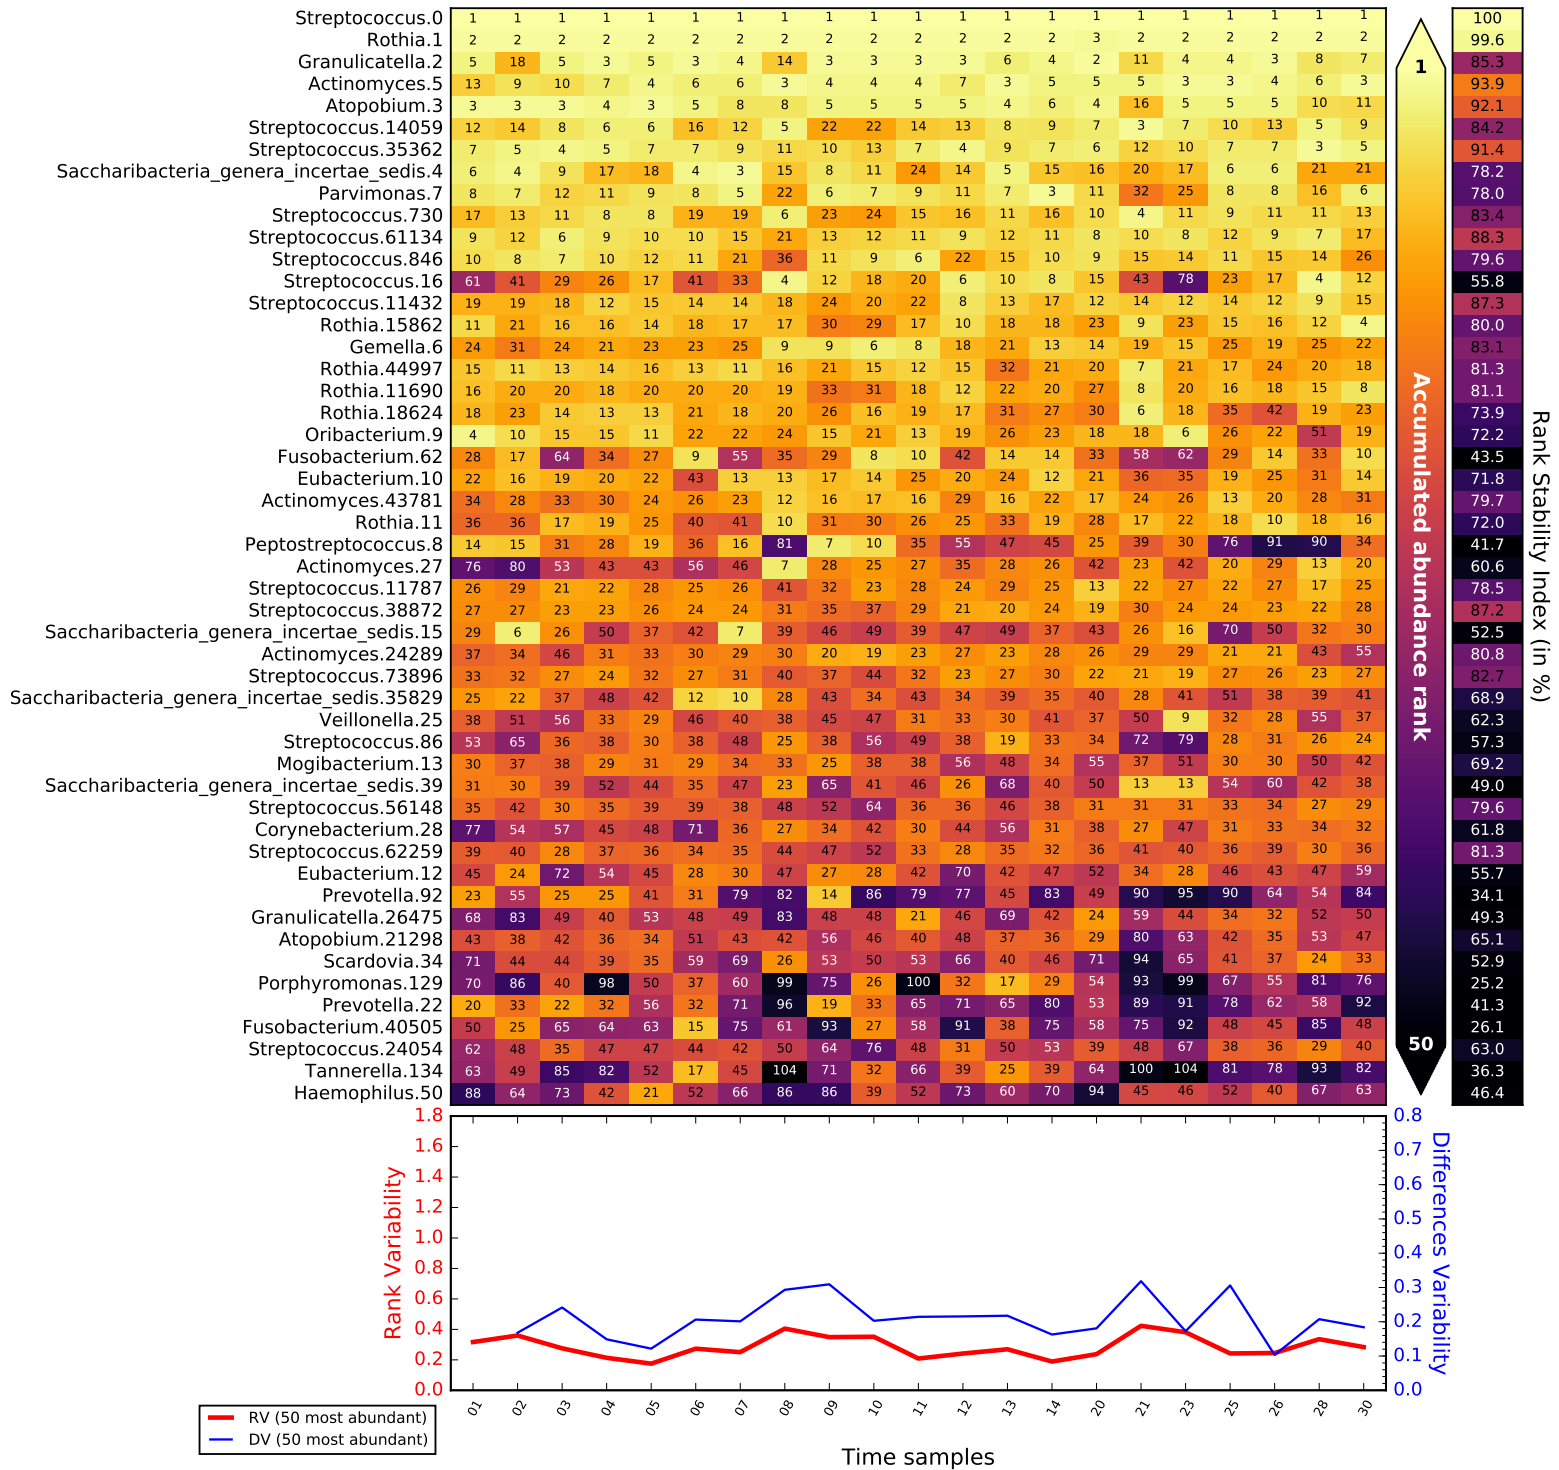

M01: rank matrix & stability

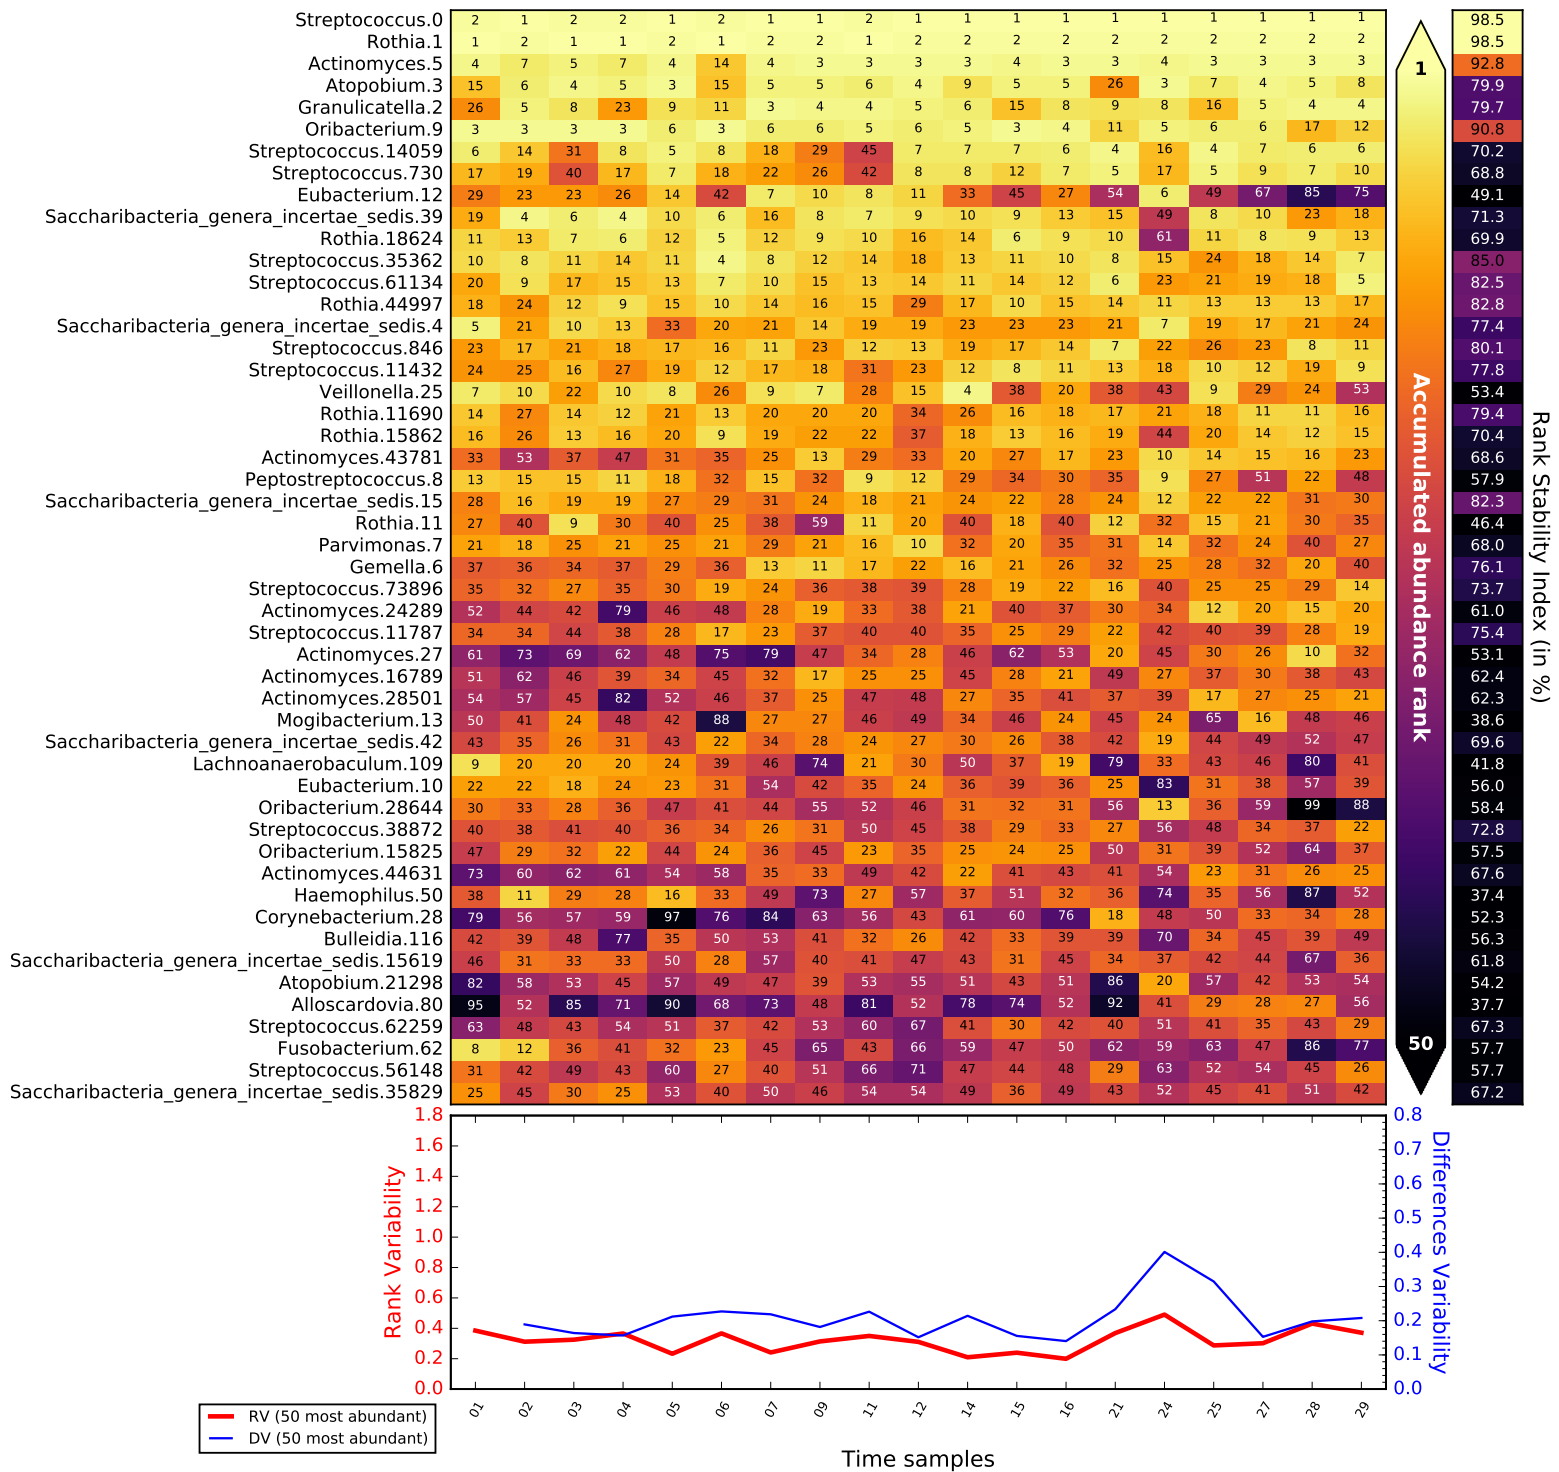

M02: rank matrix & stability

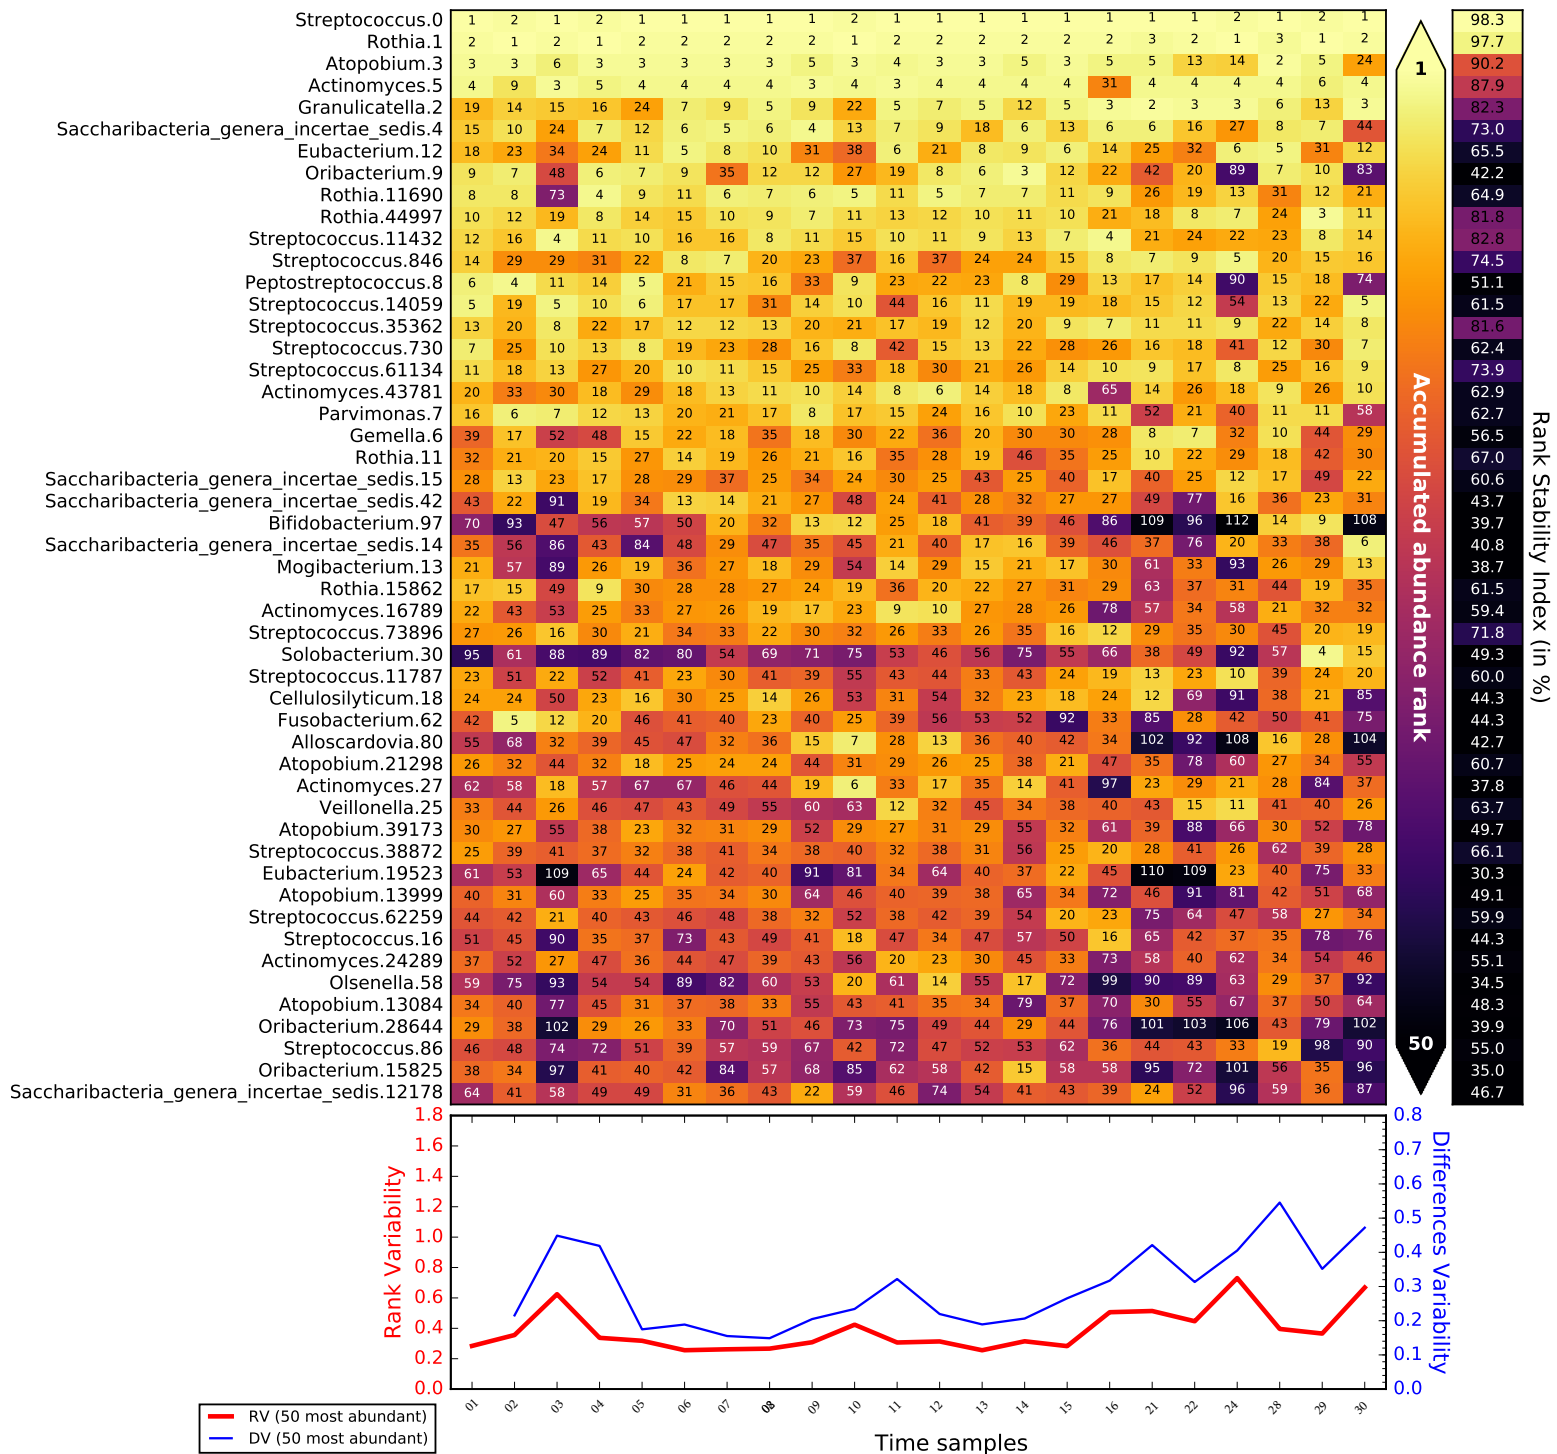

M03: rank matrix & stability

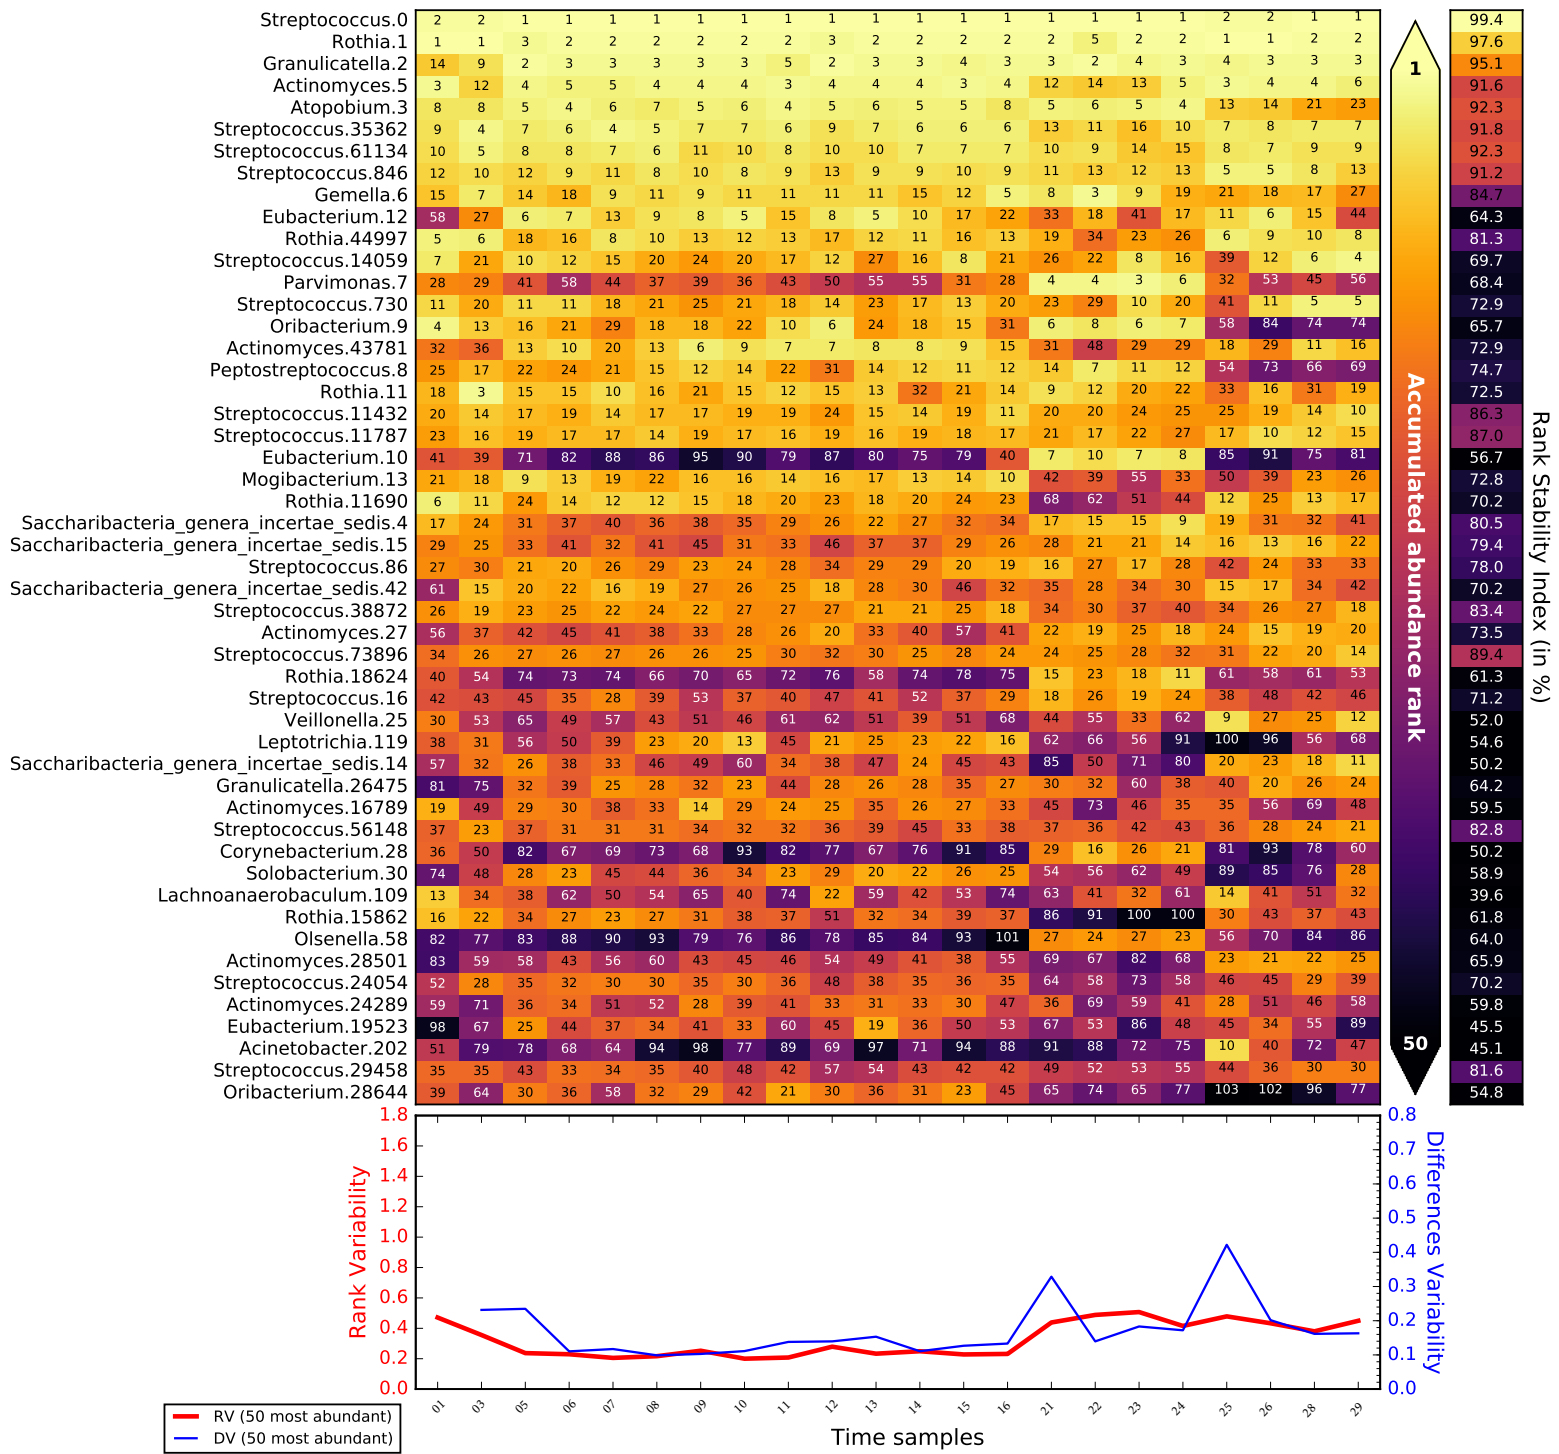

## M04: rank matrix & stability

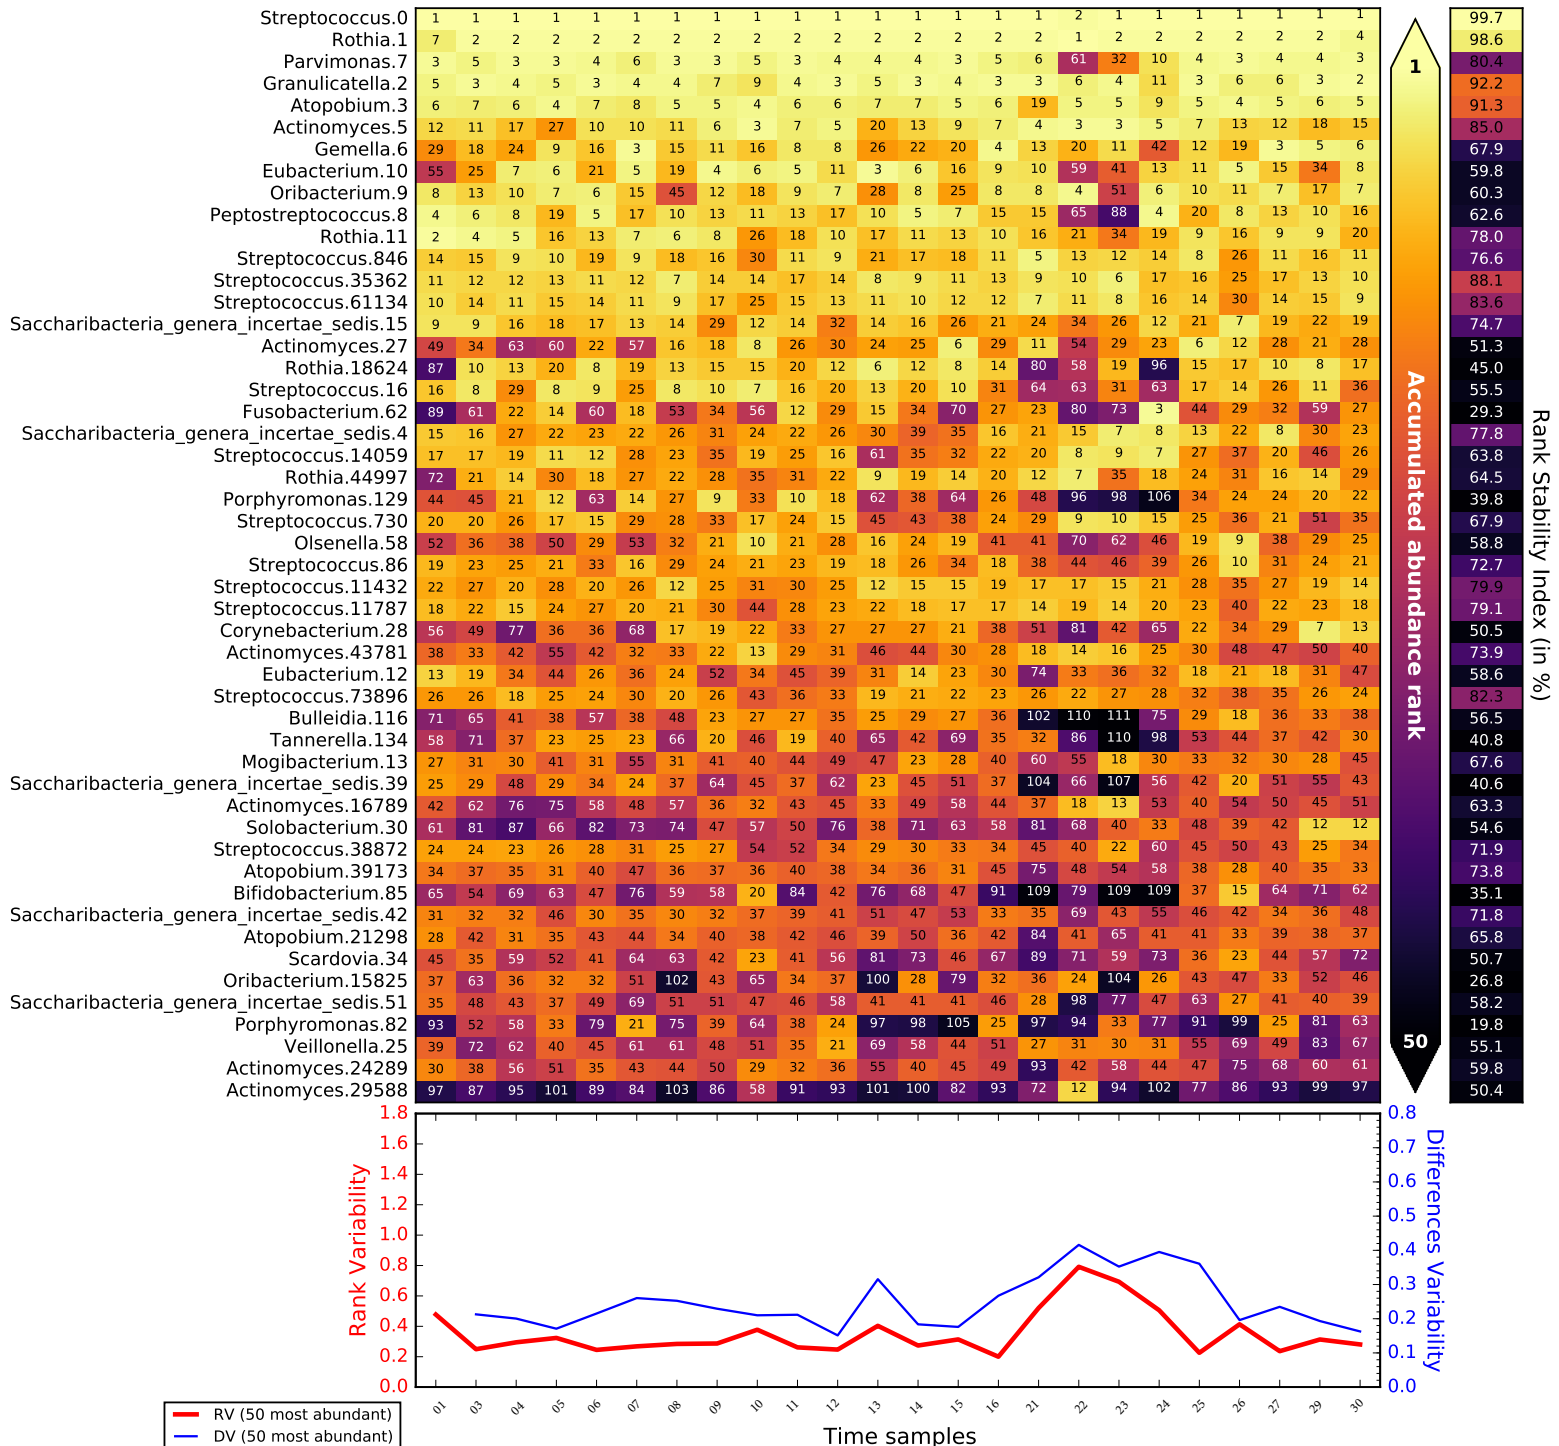

M05: rank matrix & stability

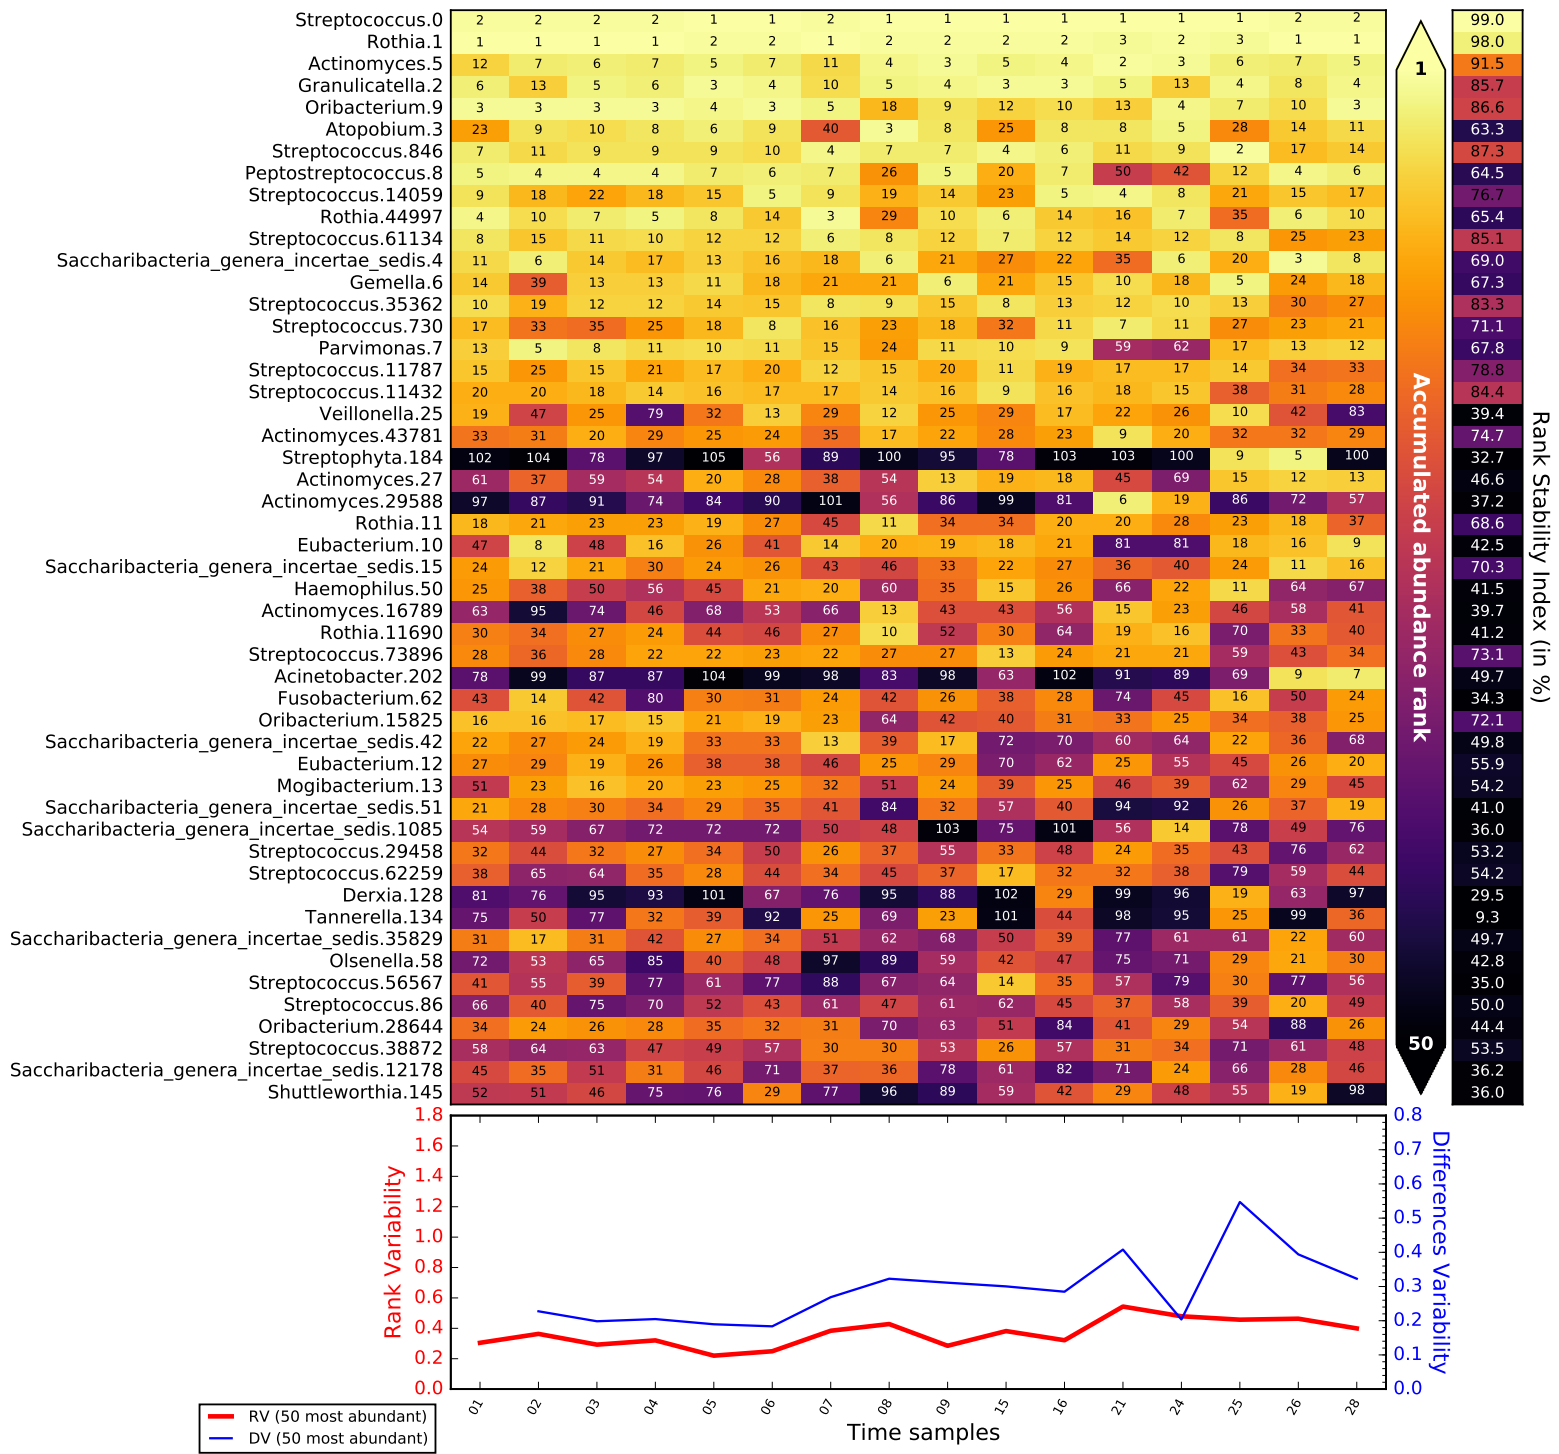

M07: rank matrix & stability

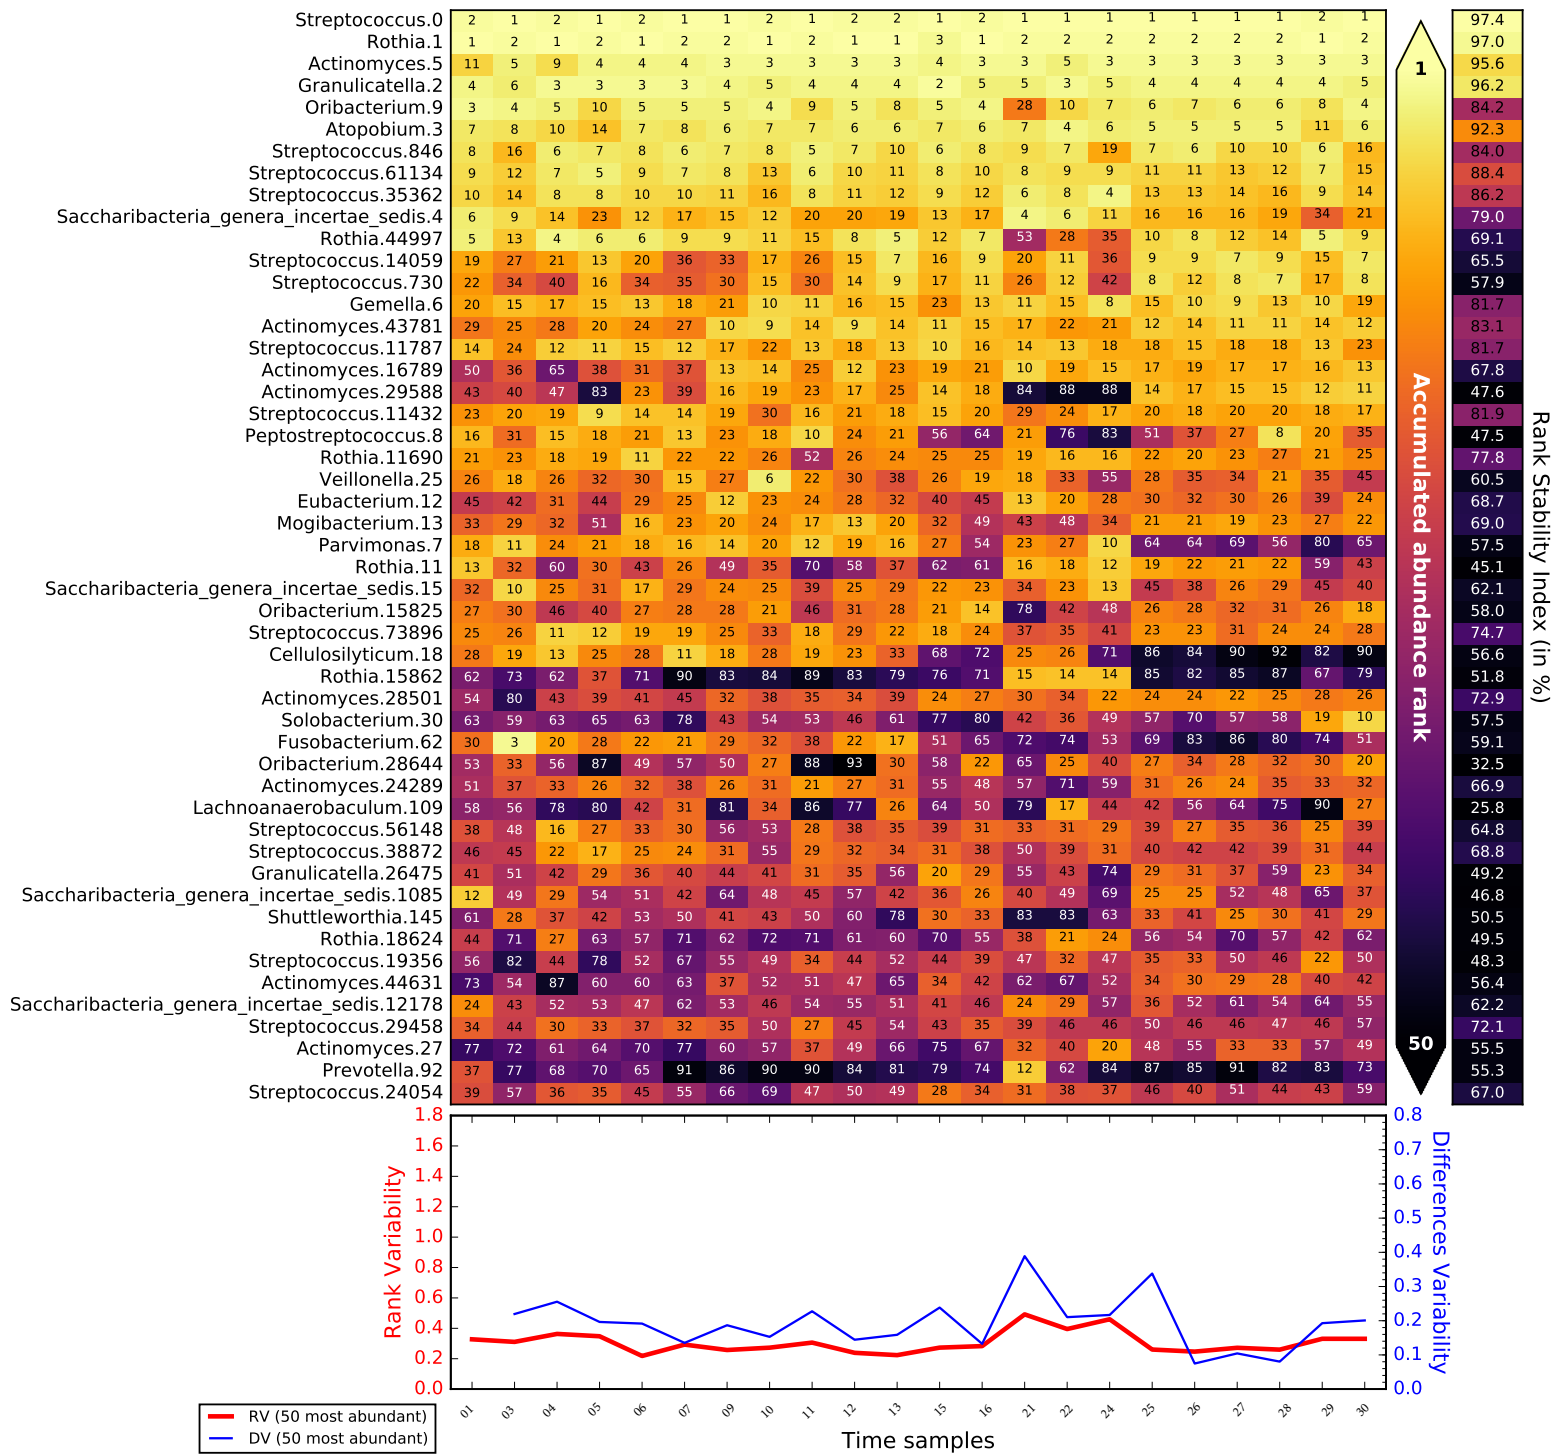

## M08: rank matrix & stability

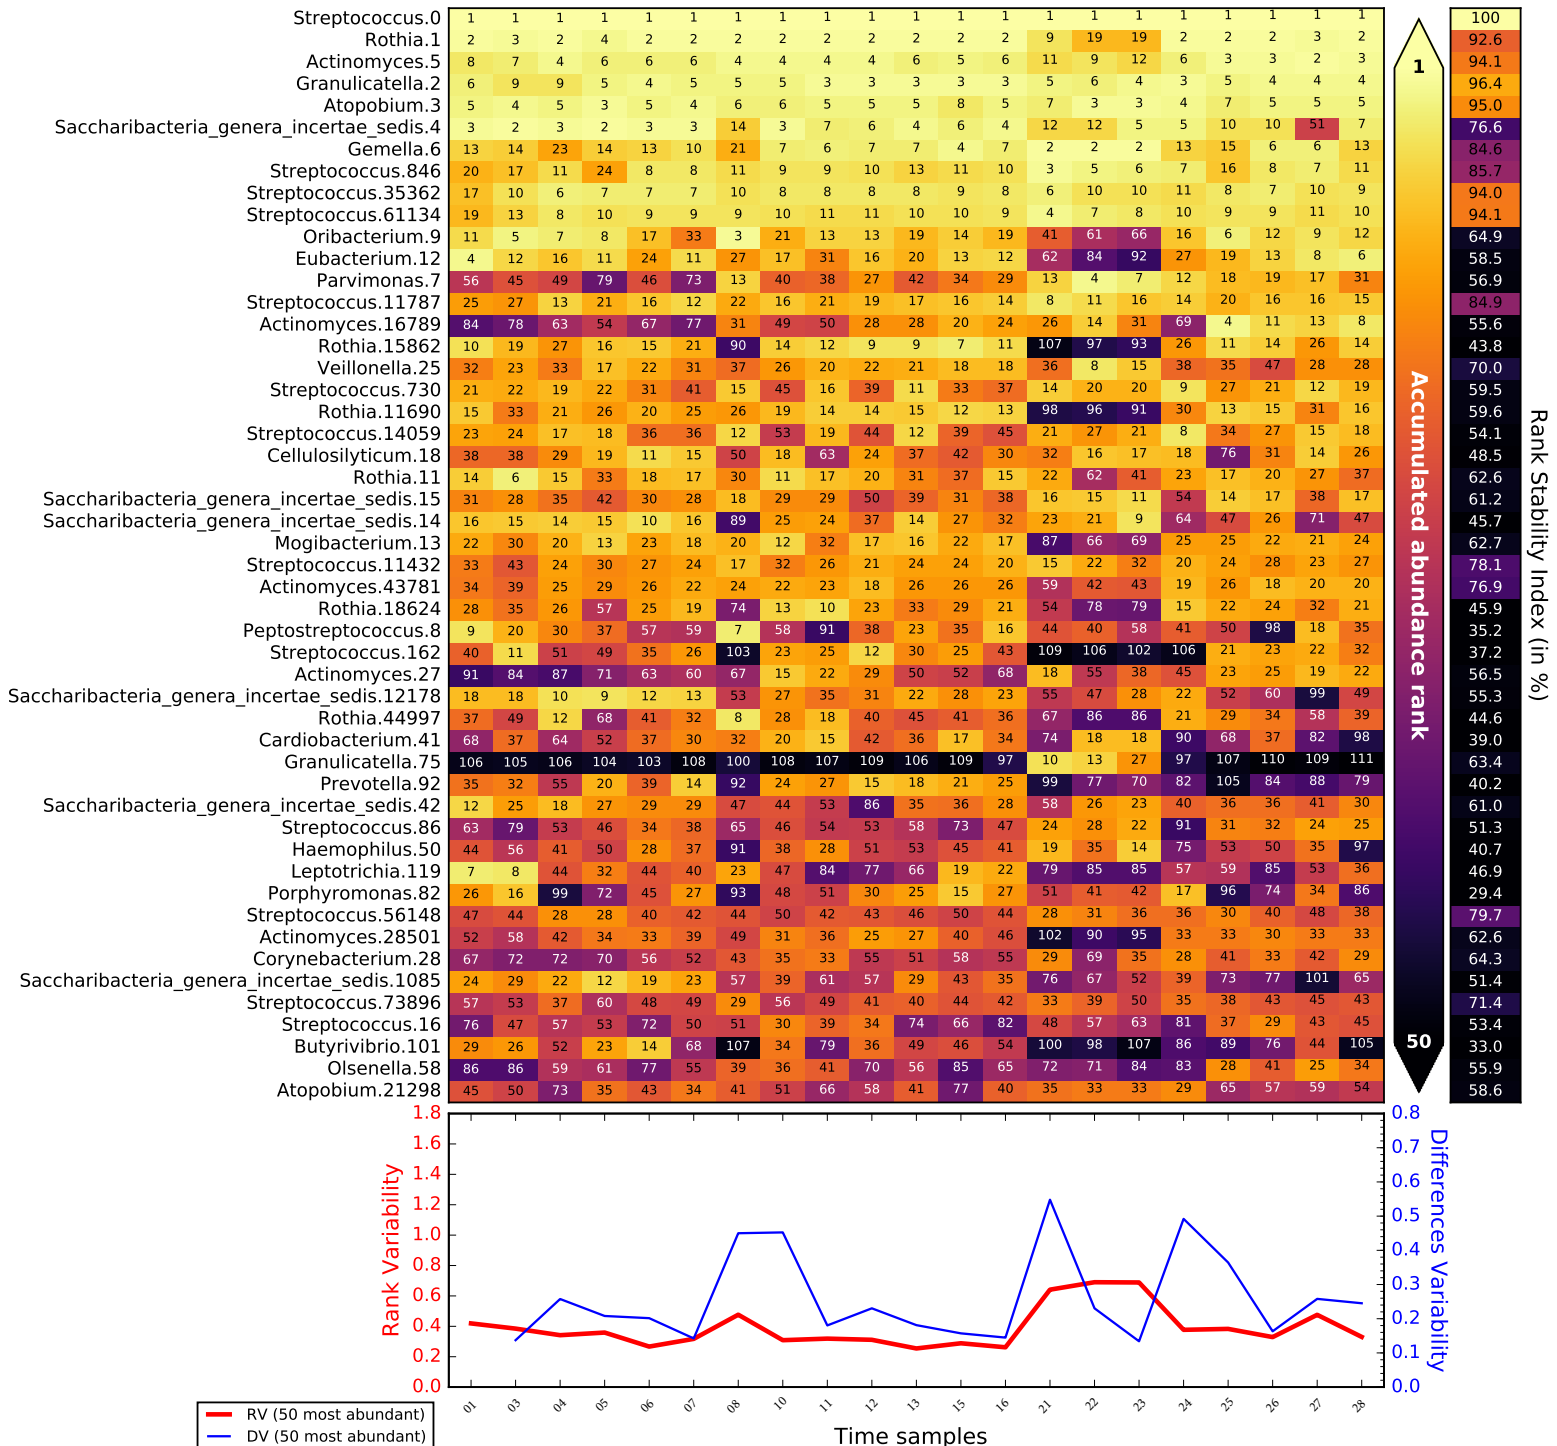

## M12: rank matrix & stability

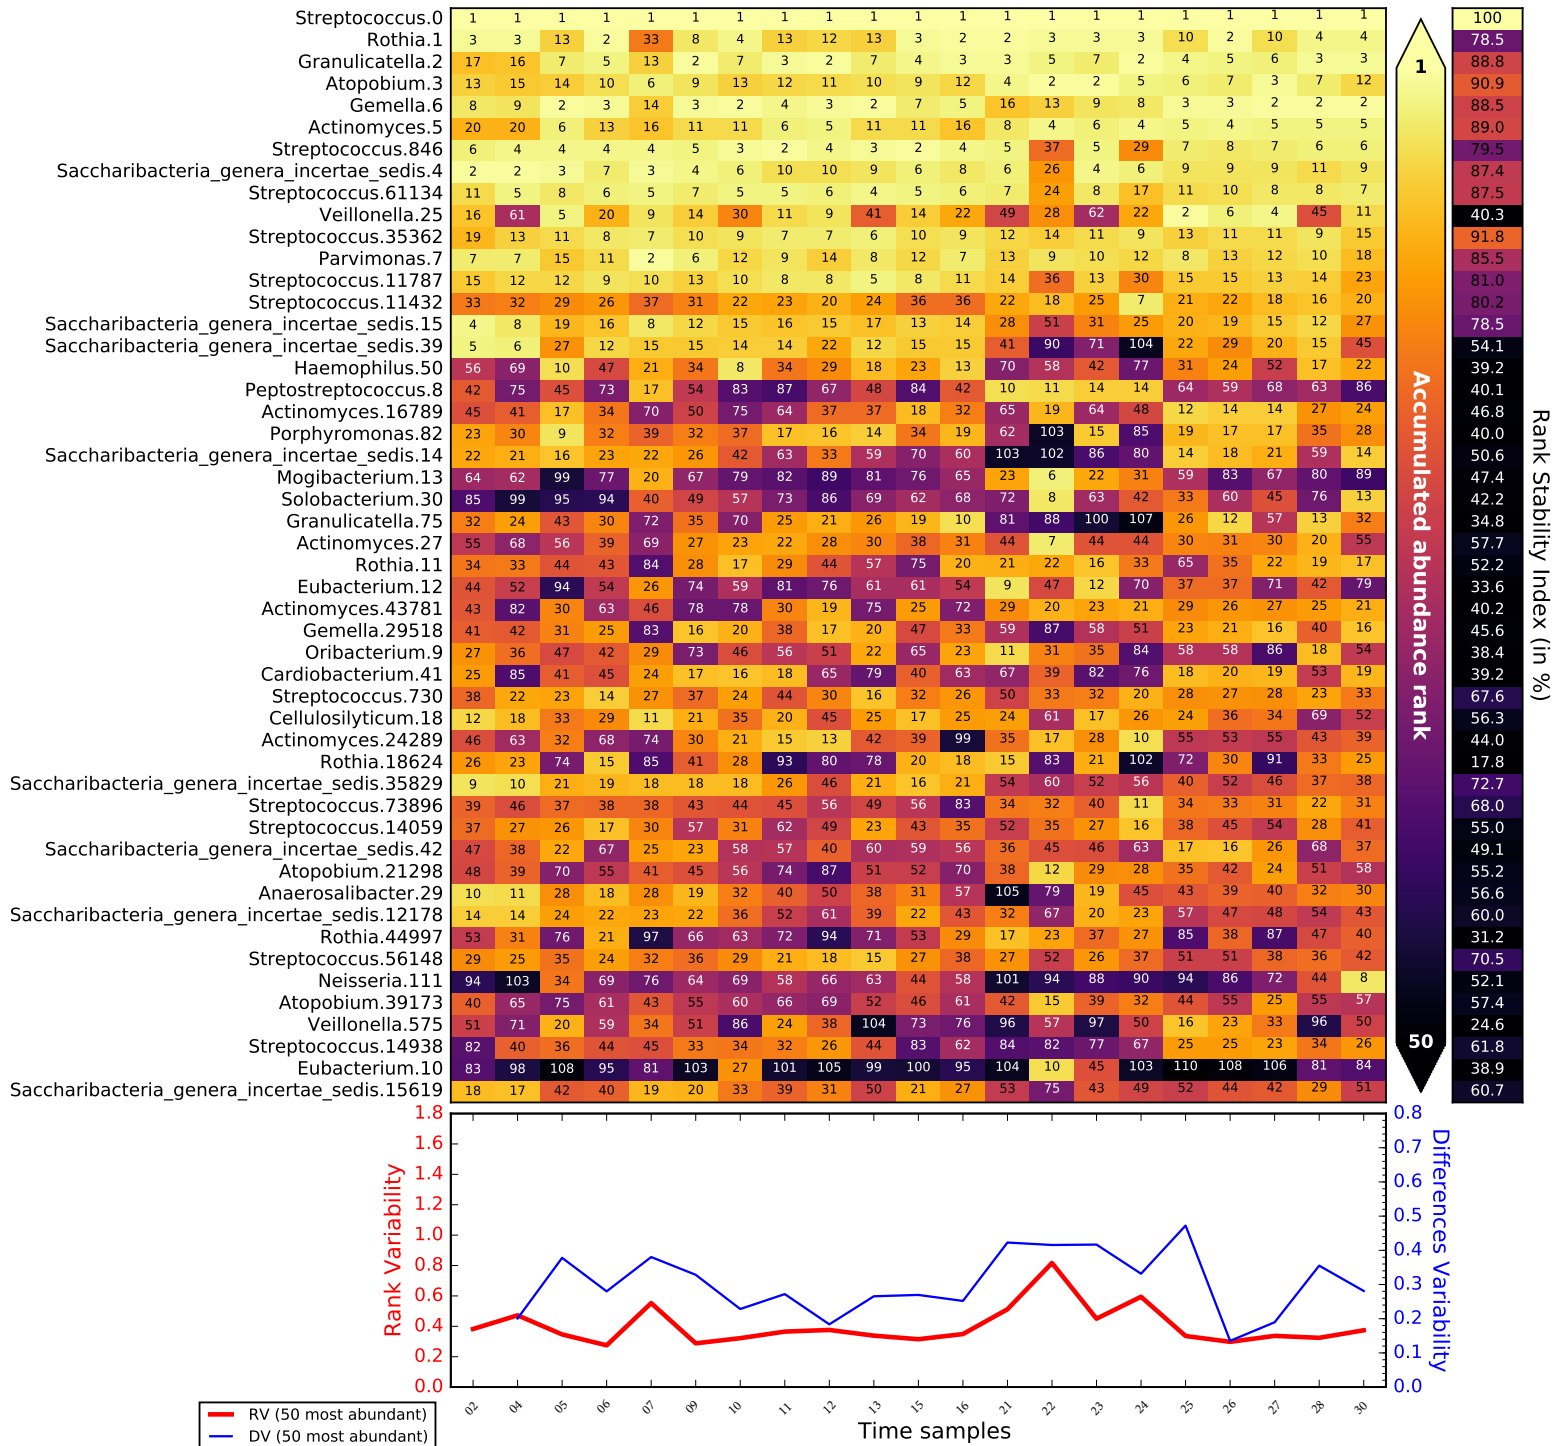

M13: rank matrix & stability

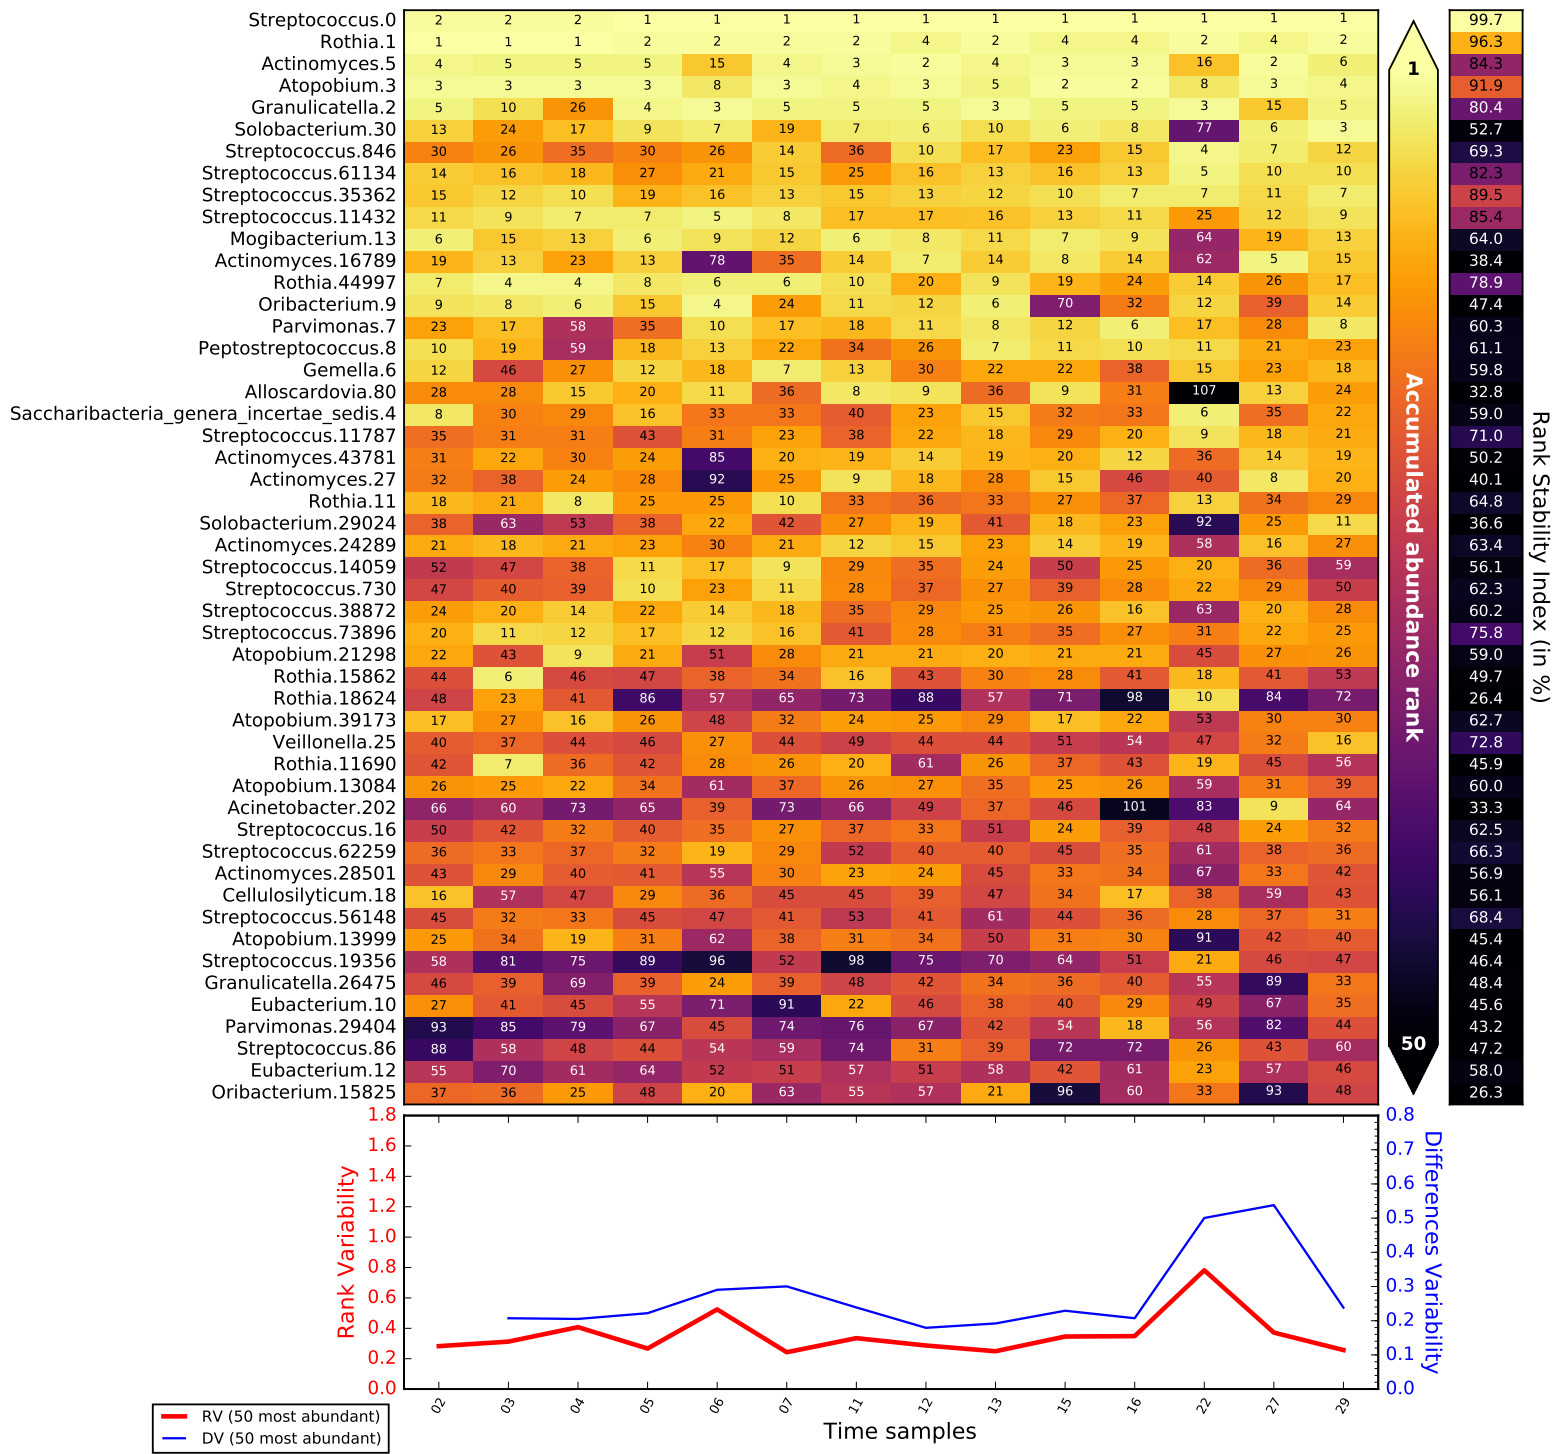

## M19: rank matrix & stability

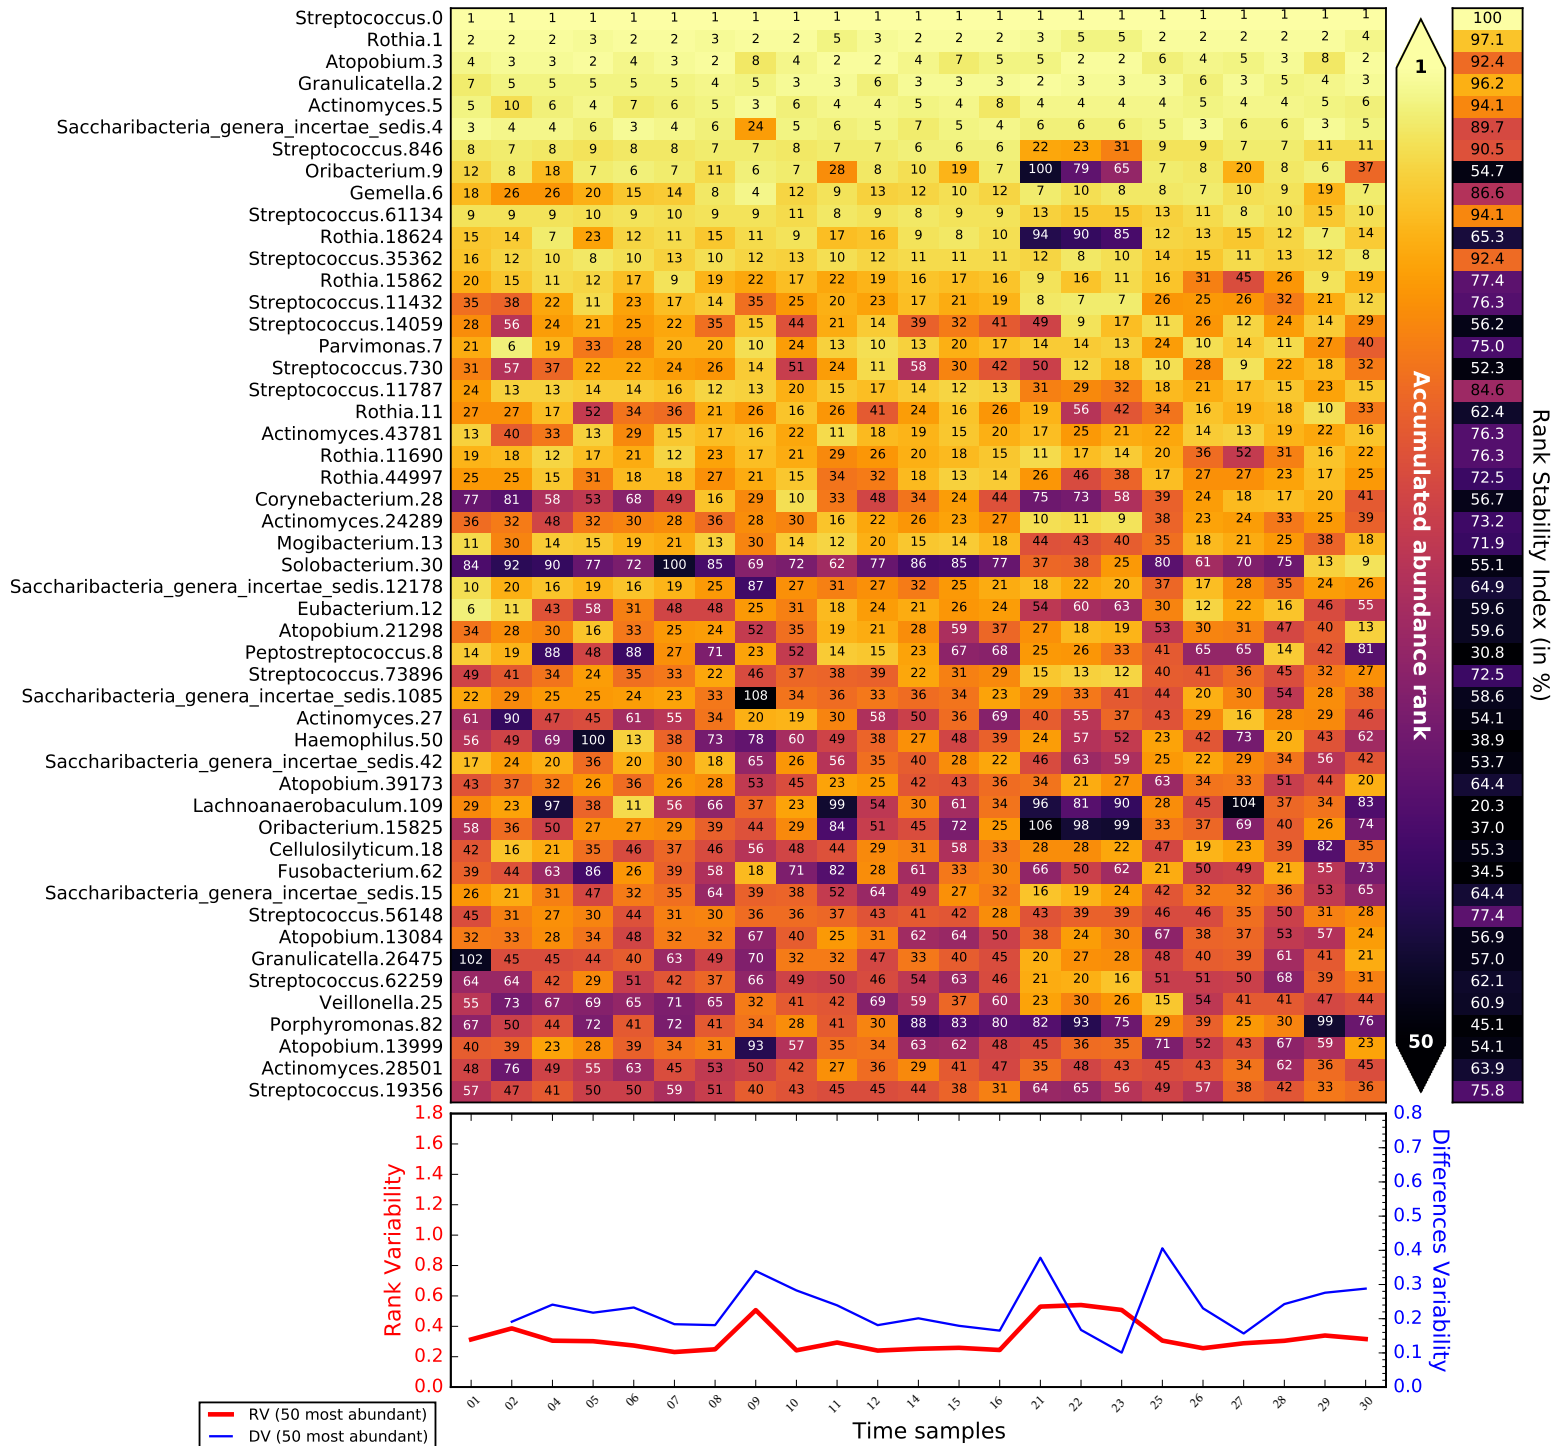

## M20: rank matrix & stability

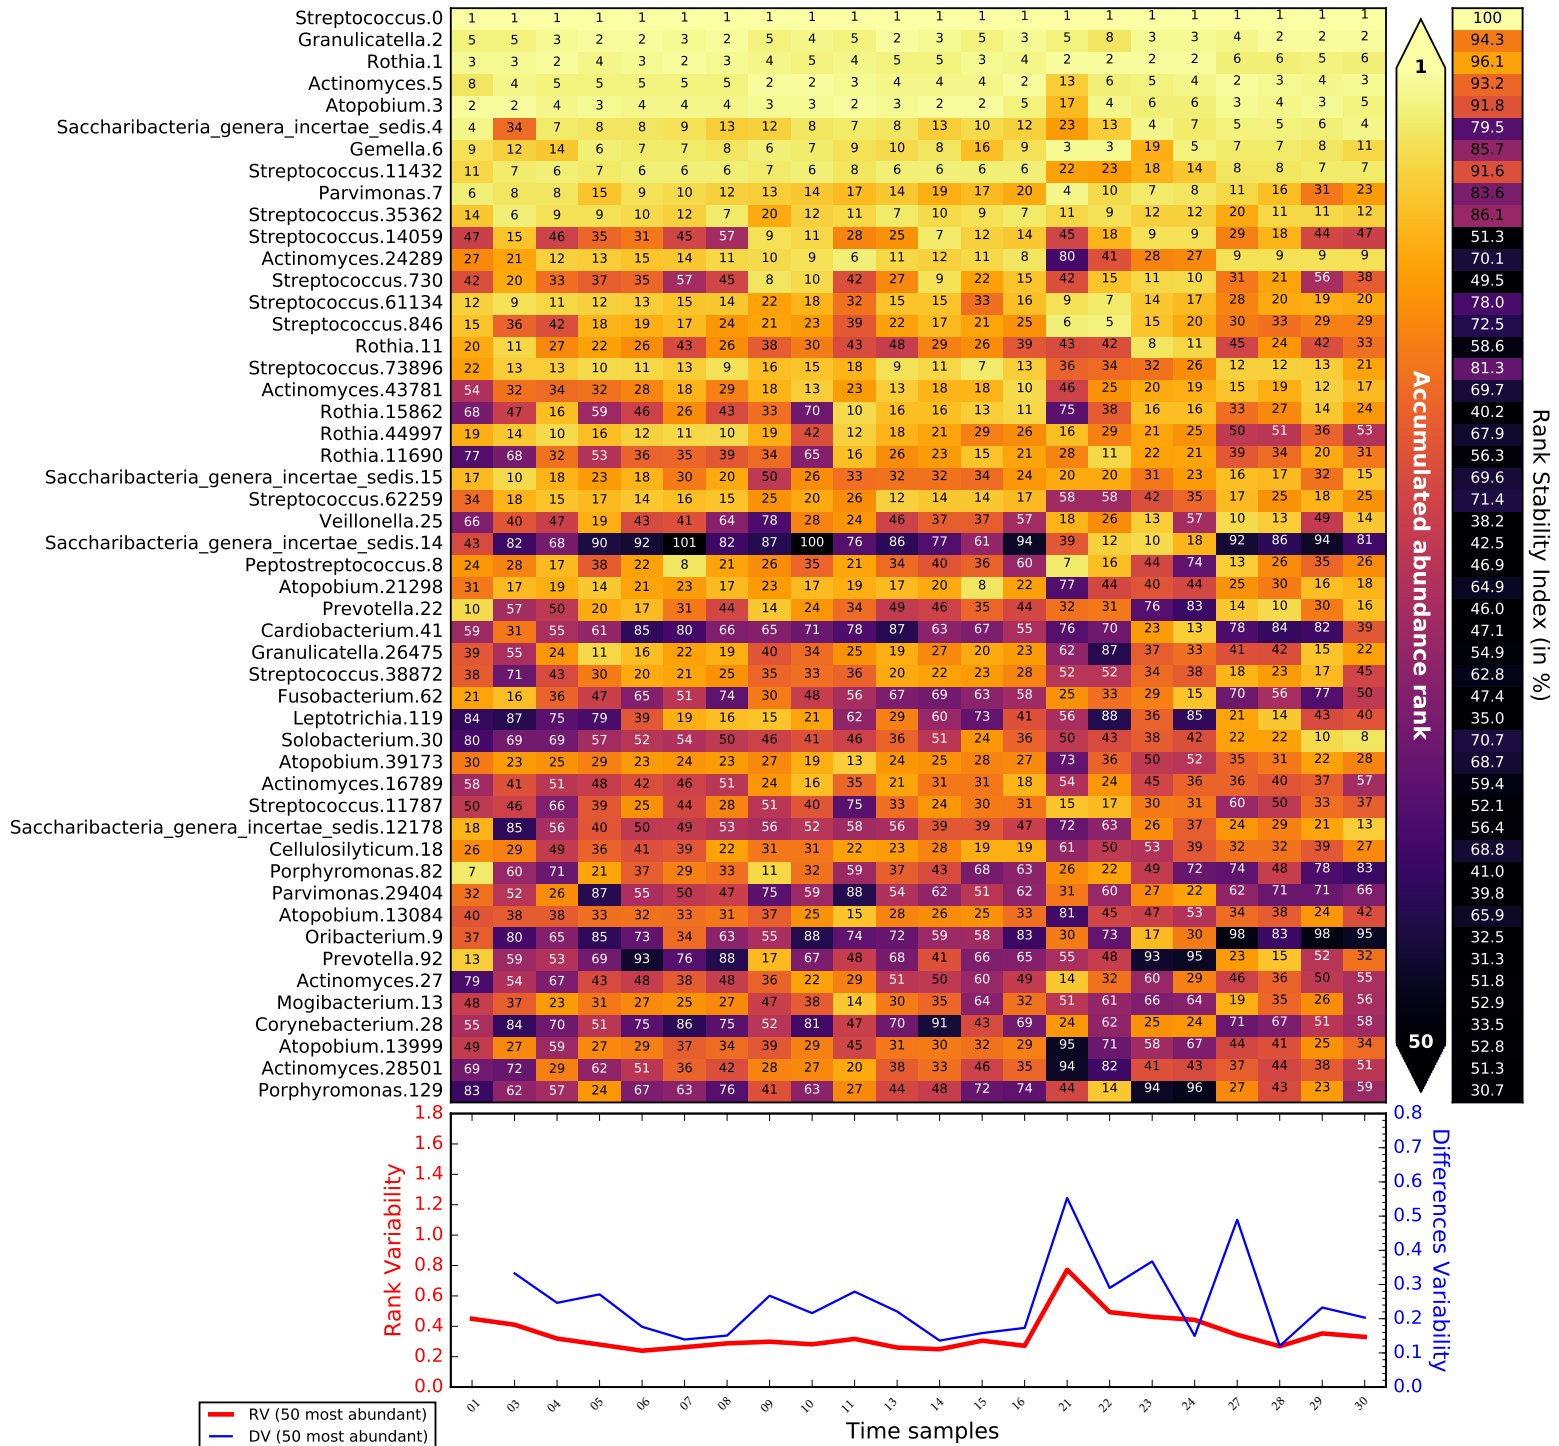

M21: rank matrix & stability

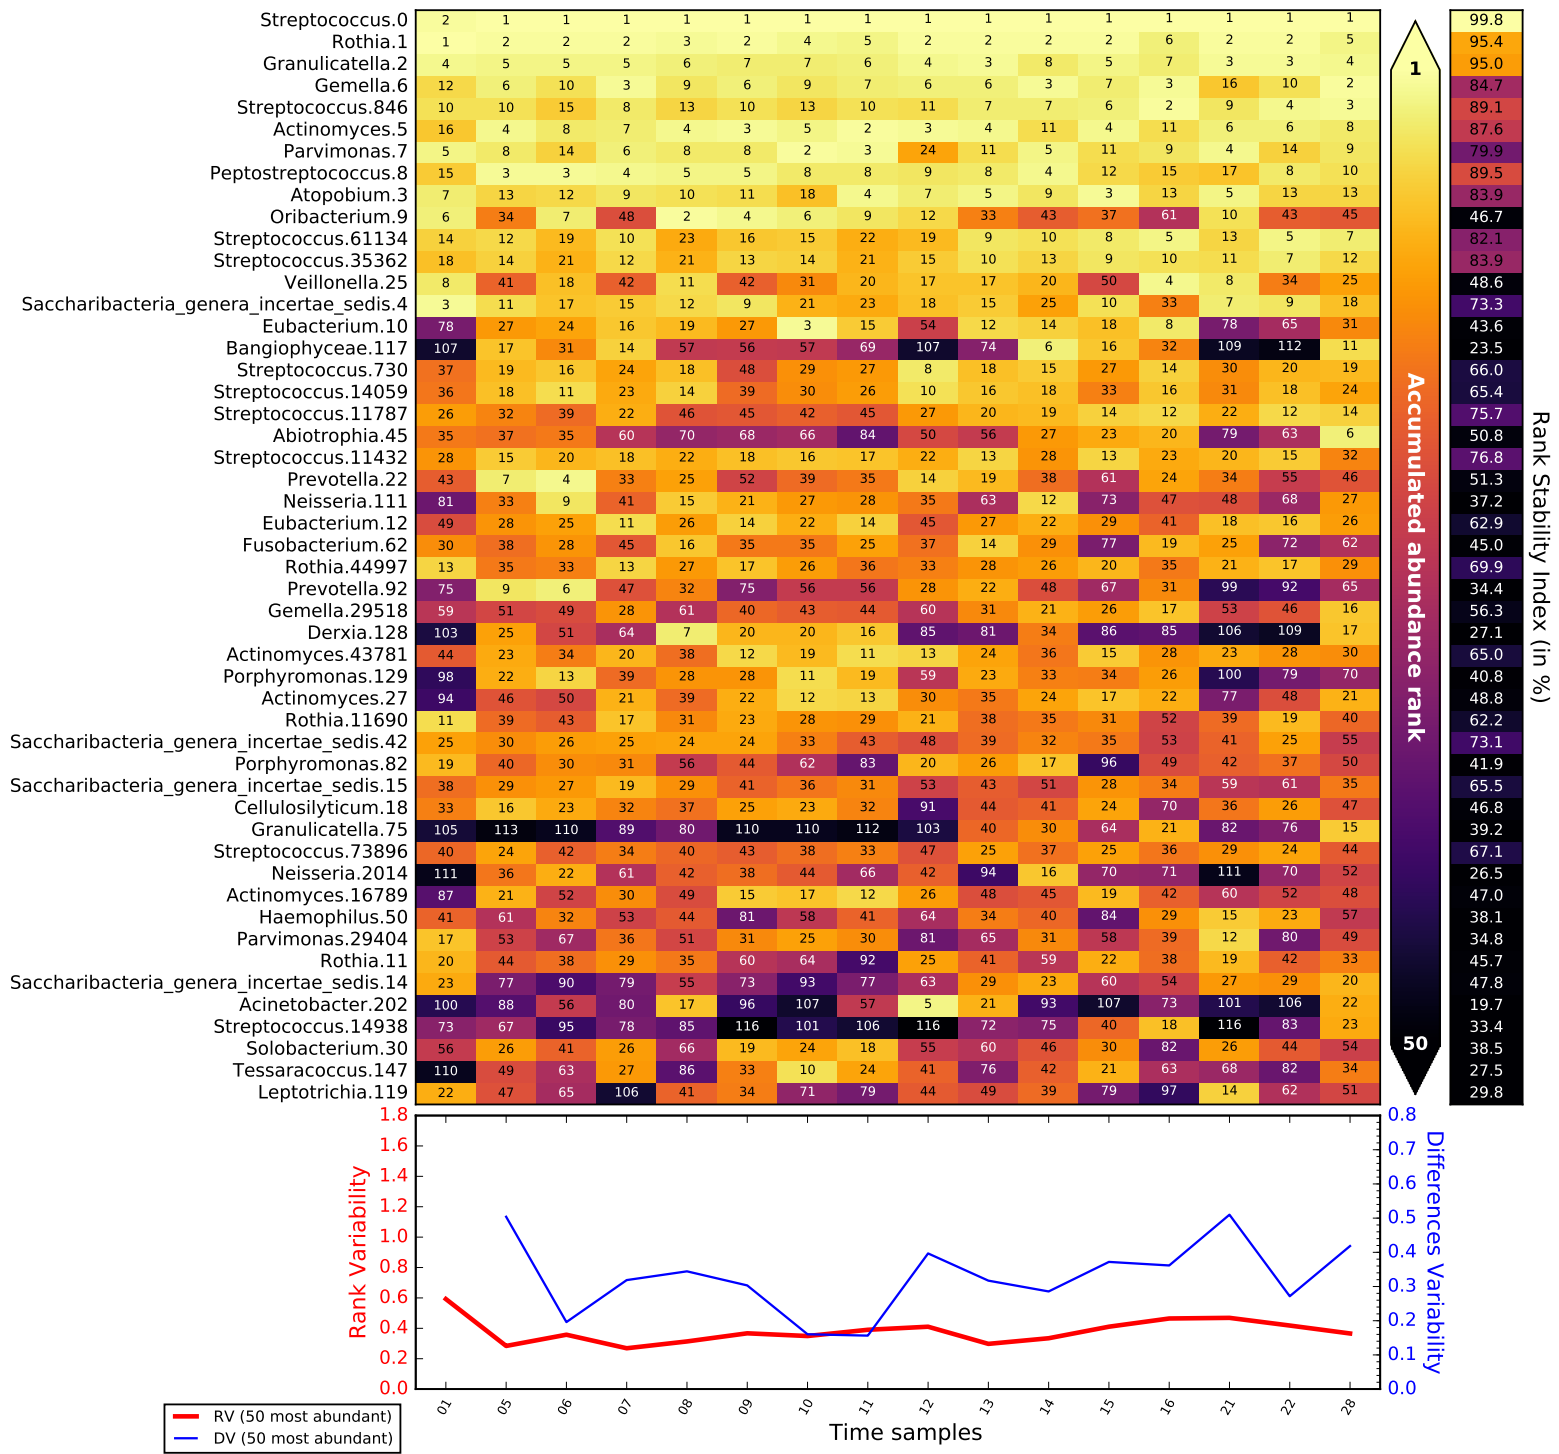

## M25: rank matrix & stability

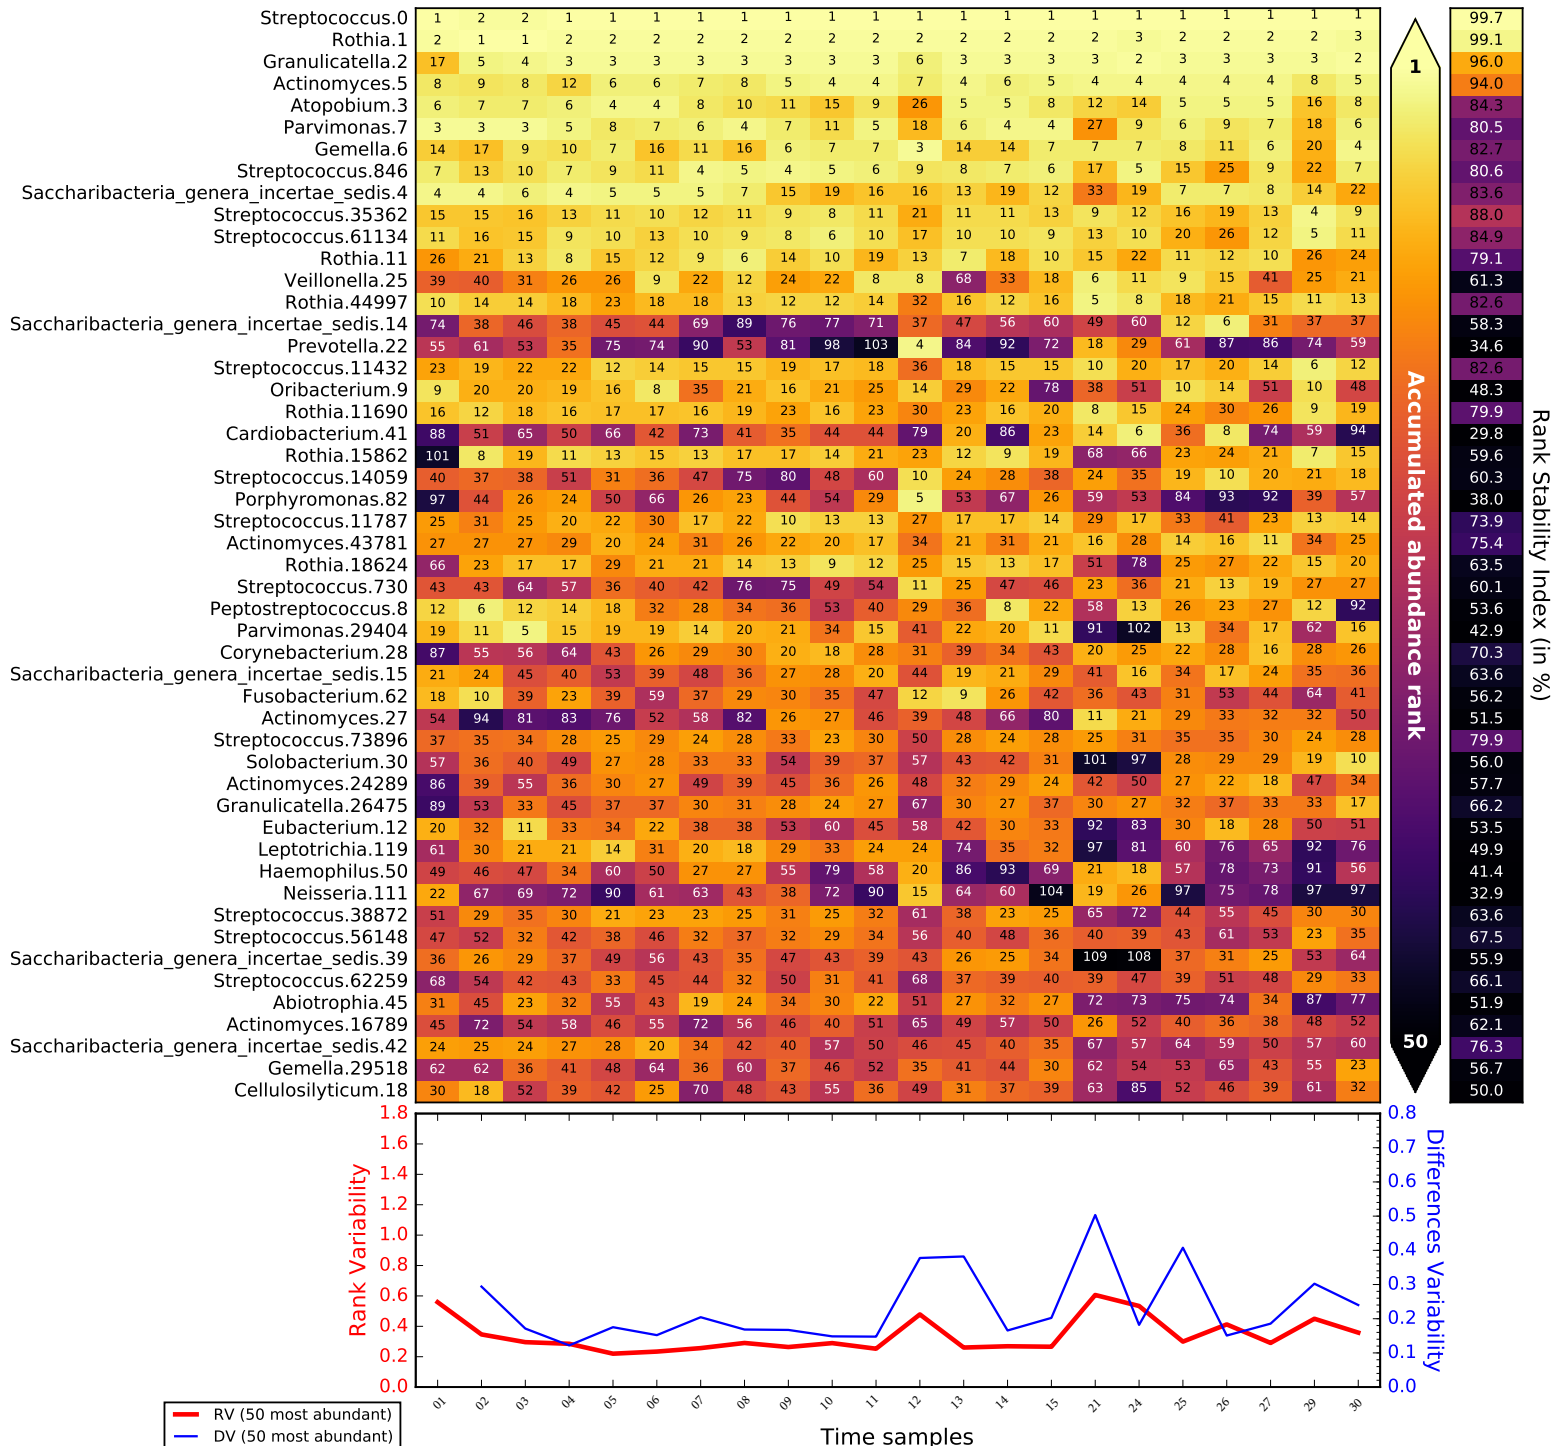

# Supplementary Figure S6:

Boxplots showing values of AGE, AOPP, FRAS, TAC and TBARS for each volunteer. The box represents middle 50% of scores which fall within the inter-quartile range, while median marks the mid-point.

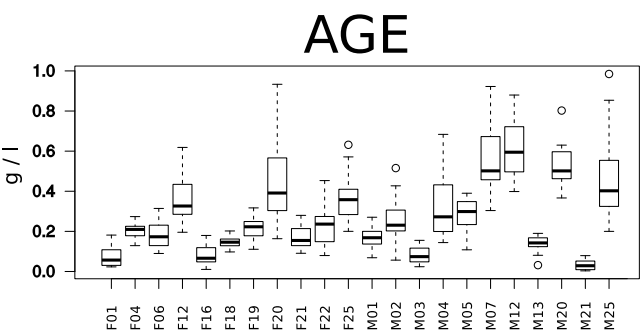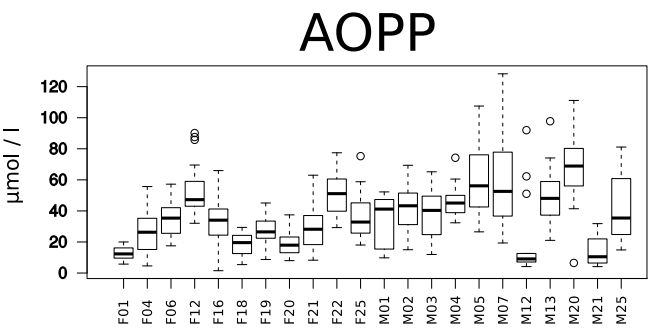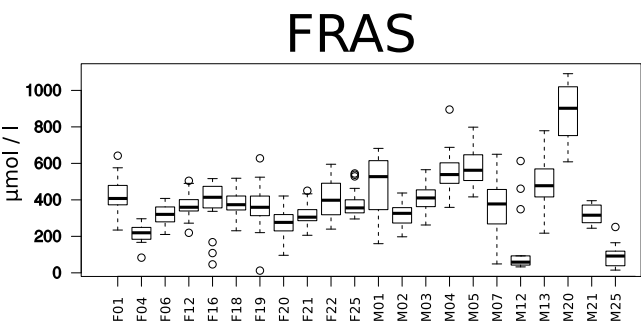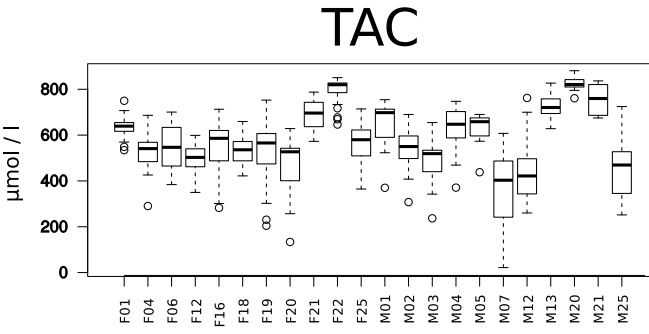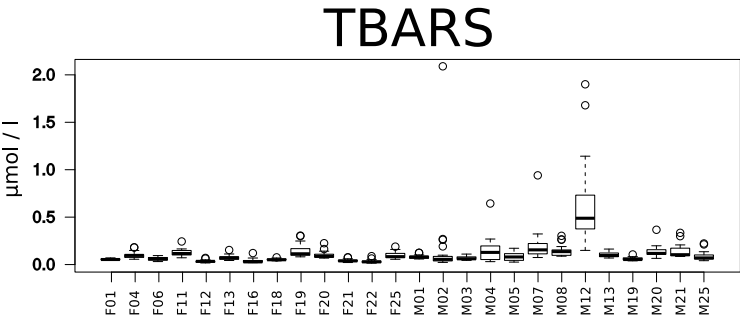

## Supplementary Figure S7:

Correlation plots summarizing Pearson's and Spearman's correlations on intra-individual level. Both temporally direct and lagged correlations were calculated. The color bar on the right of each panel indicates in how many individuals a negative (red) or a positive (blue) correlation was detected.

### Pearson's correlations

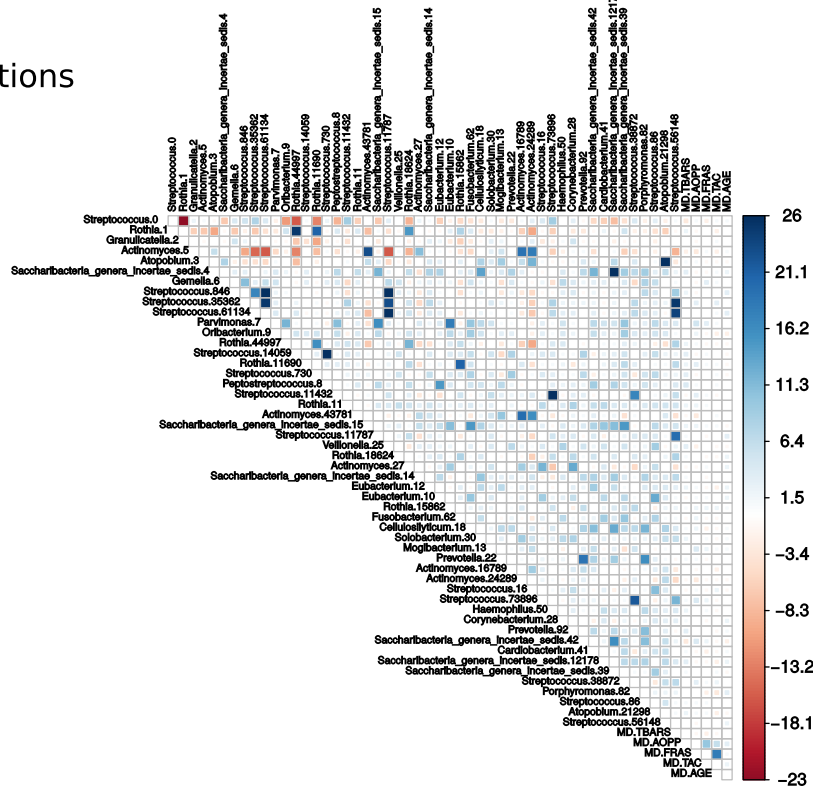

### Spearman's correlations

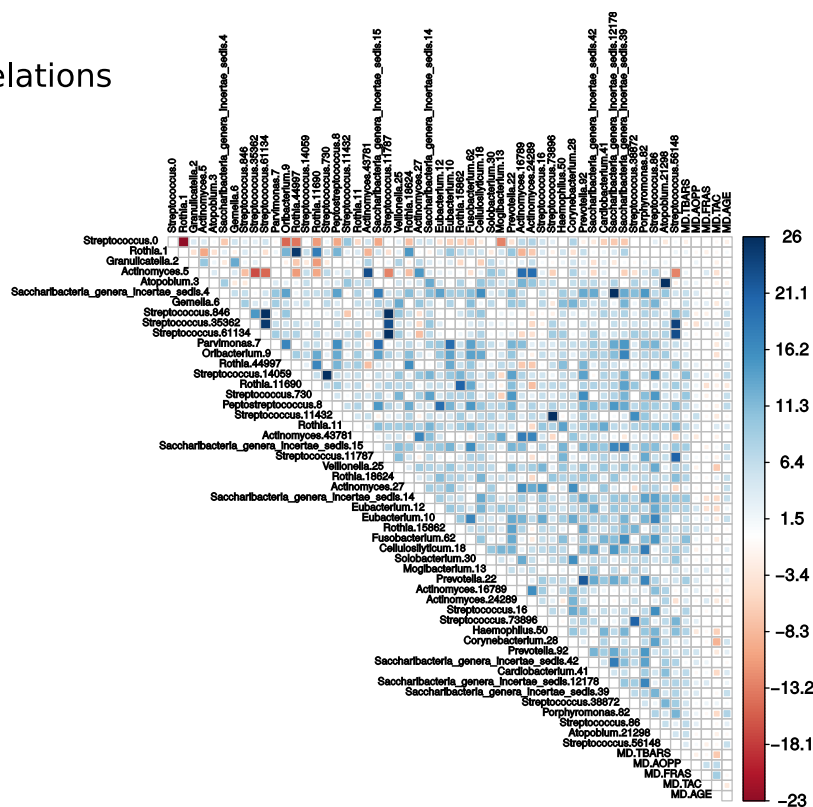

# Supplementary Figure S8:

Community interaction plots between the 15 most prevalent OTUs per sample based on the Lotka-Volterra model. This dynamic model of ecological interactions in temporal samples series counts with the situation in which the OTU #1 interacts with OTU #2, but the OTU #2 does not have to interact necessarily with OTU #1. In each case, the blue color represents negative interaction between two OTUs, whereas orange represents positive interactions. The diagonal in the matrix represents the auto-interaction of each OTU. The interaction values were normalized at a logarithmic scale for representative purposes.

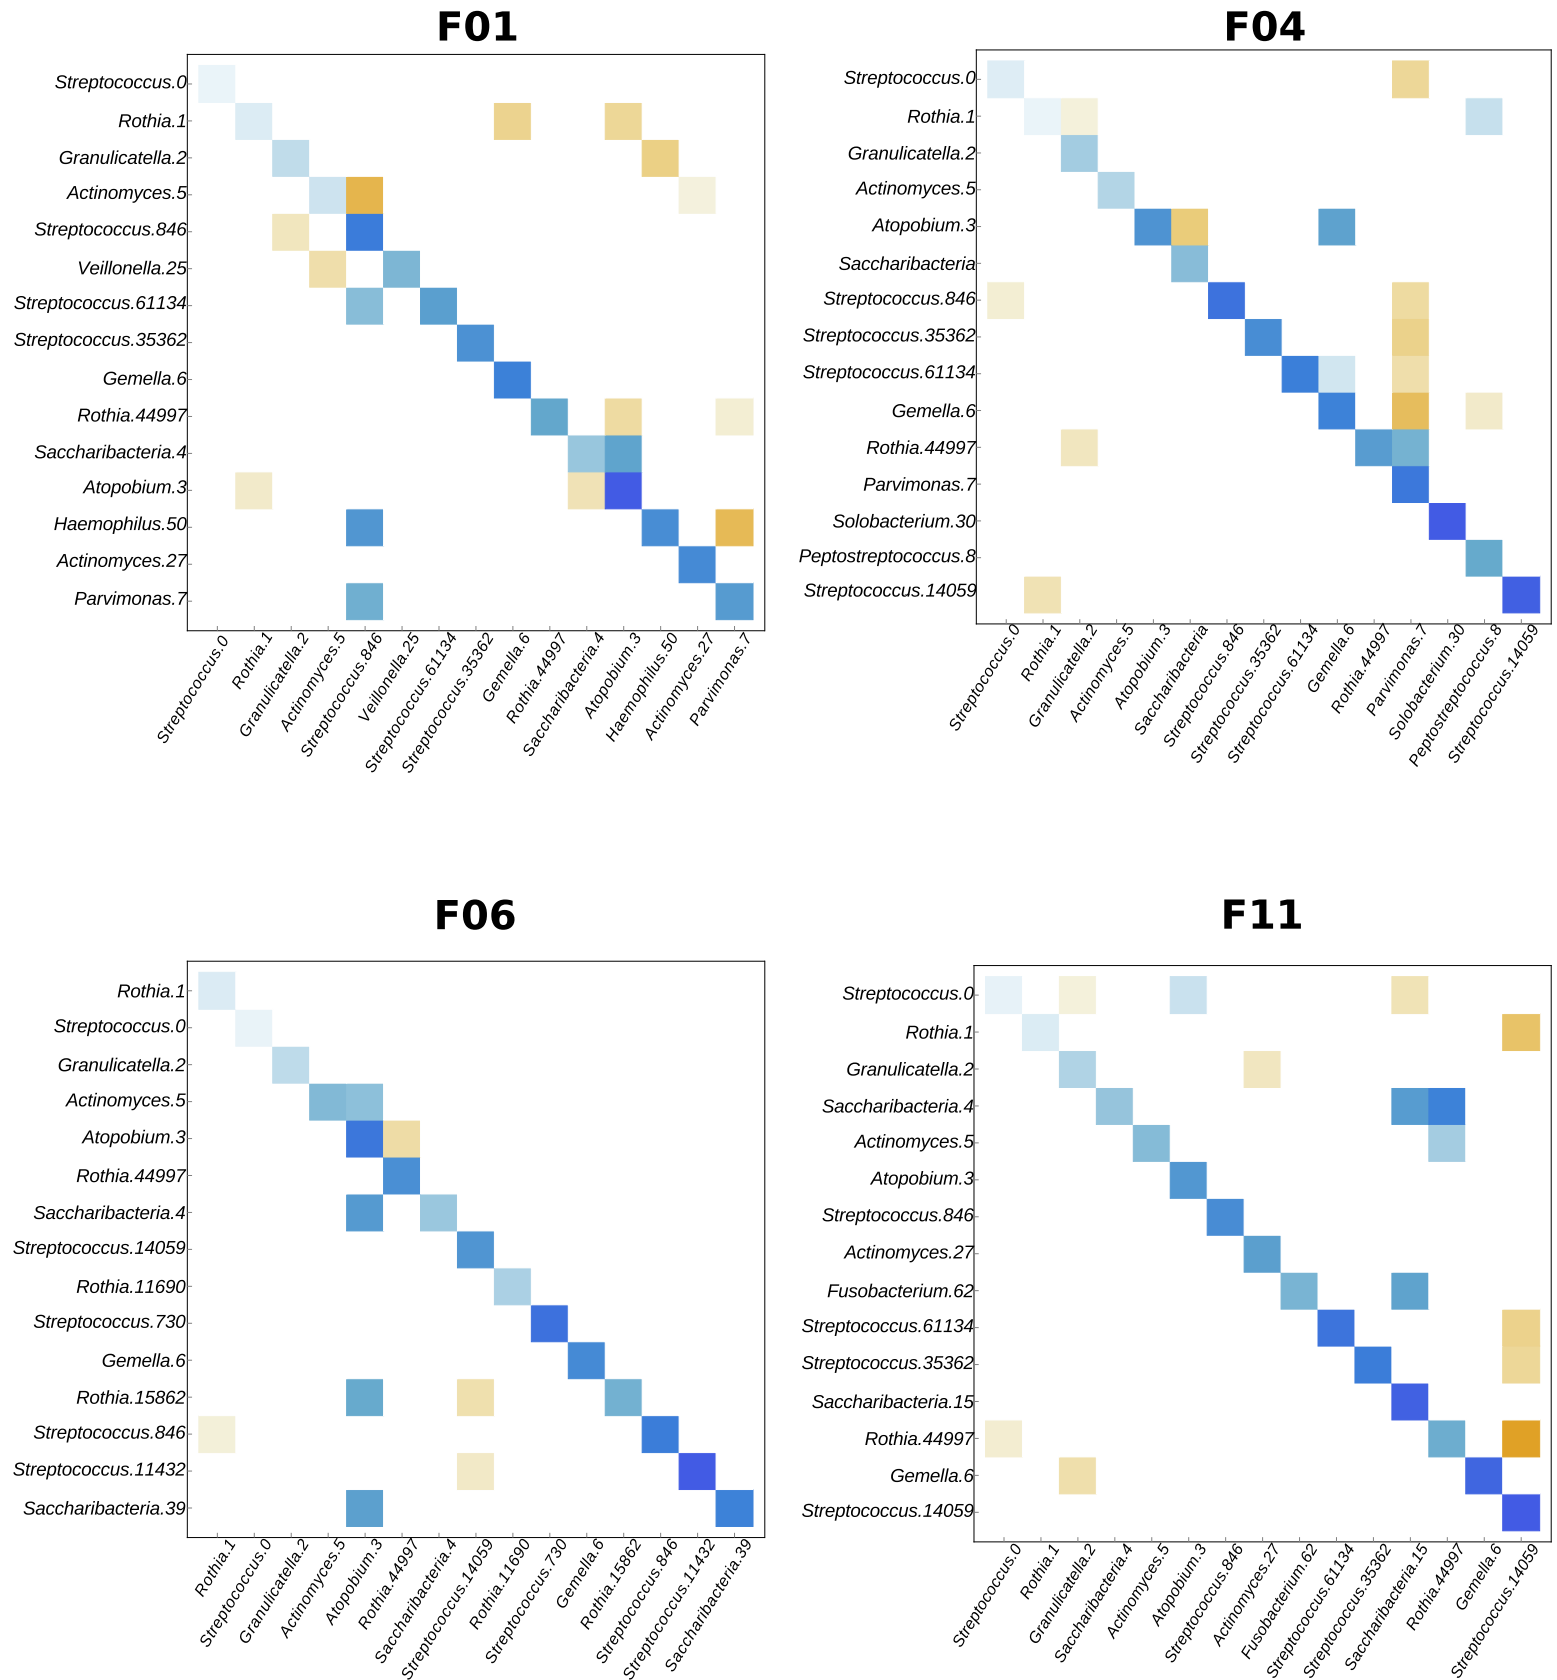

F12

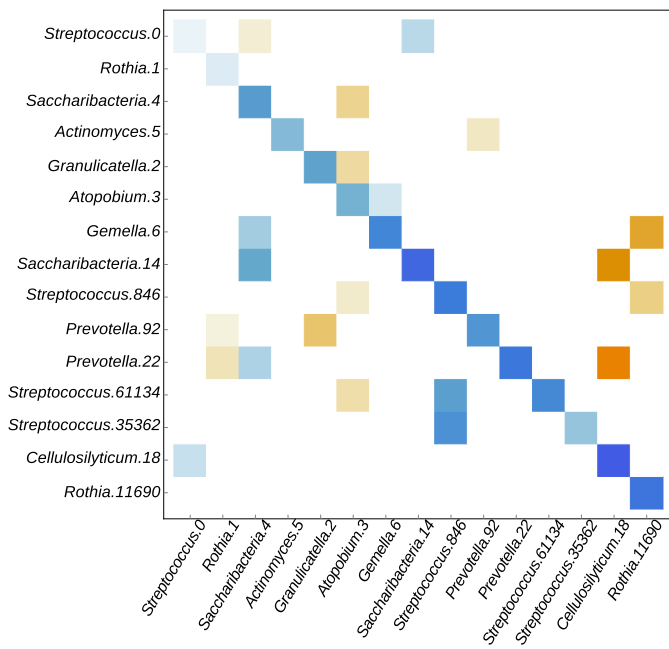

F13

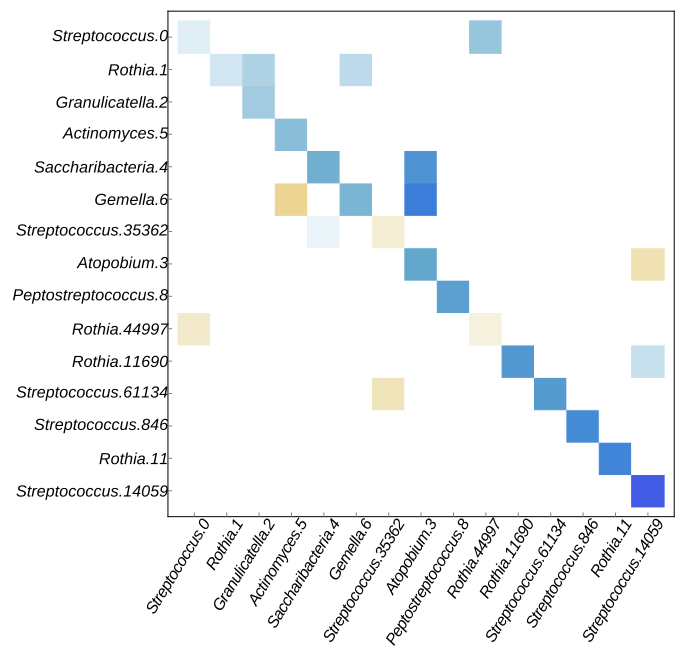

F16

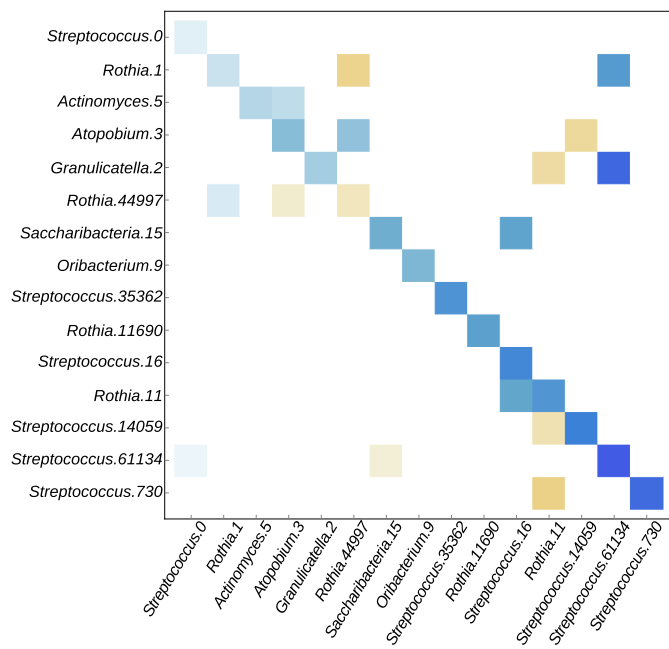

F18

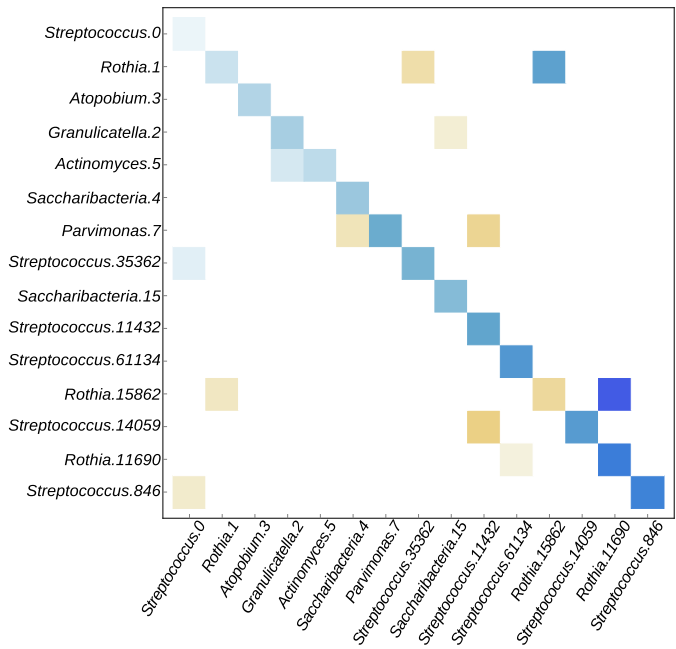

F19

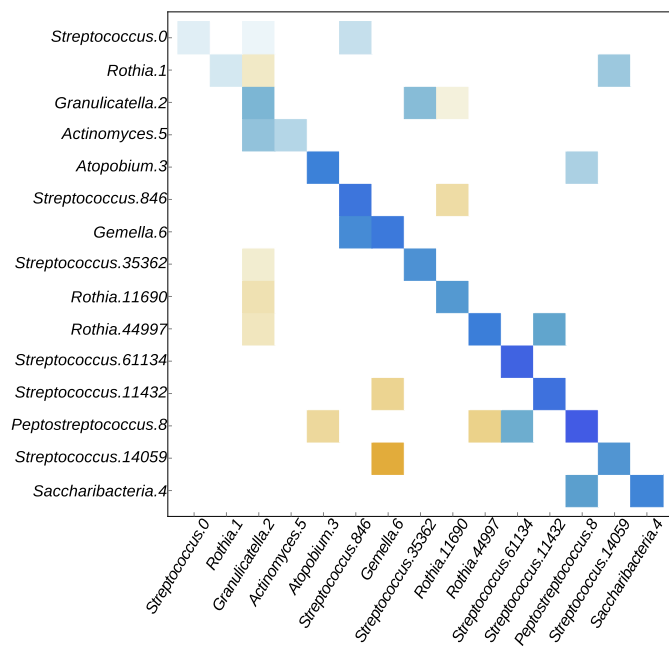

F20

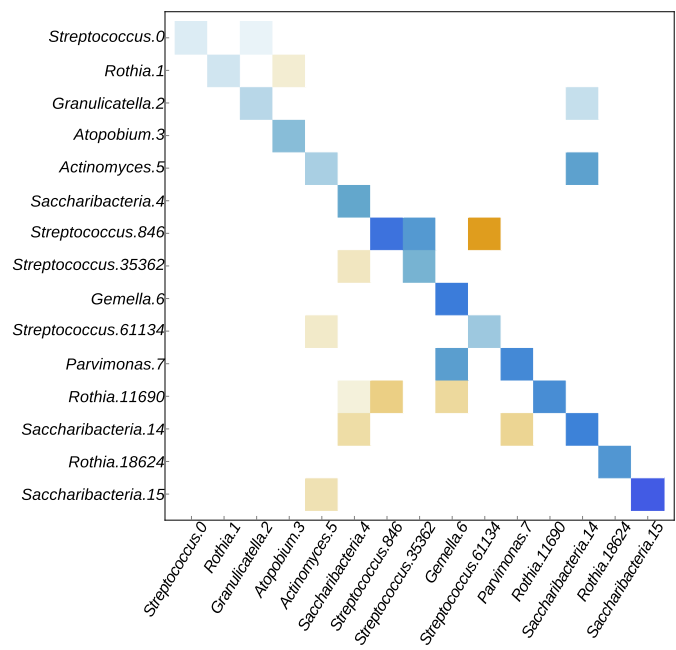

F21

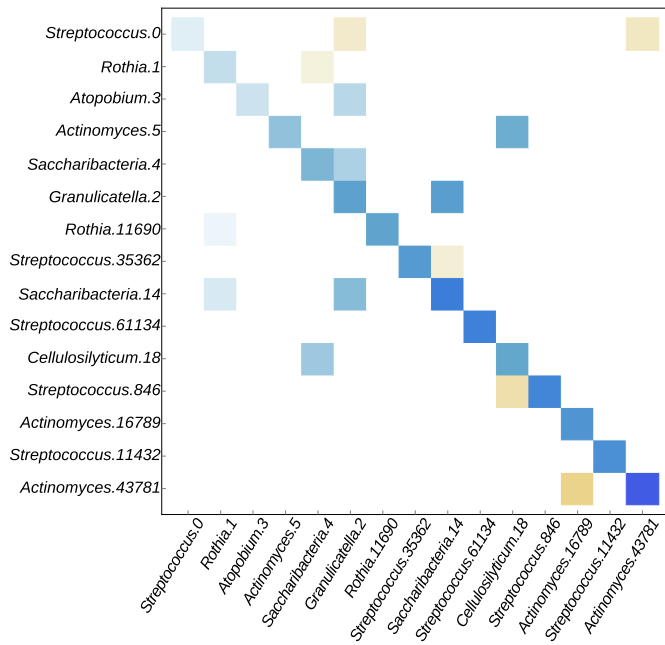

F22

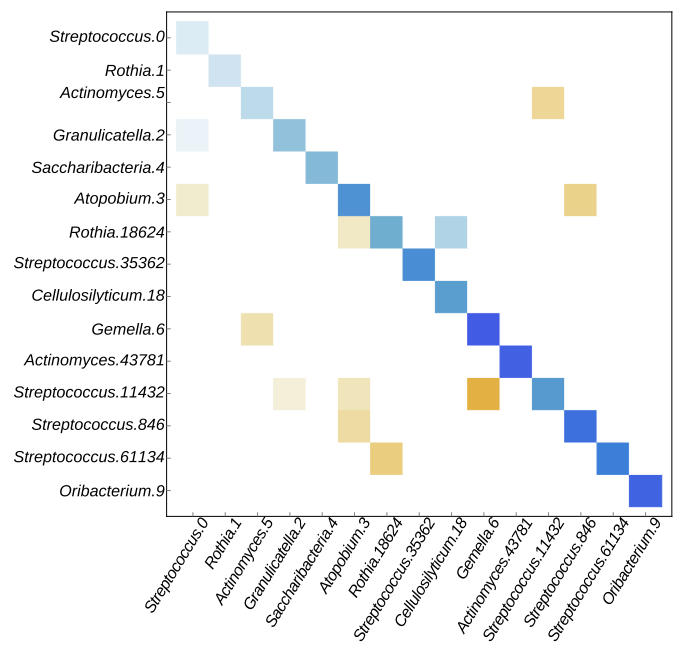

F25

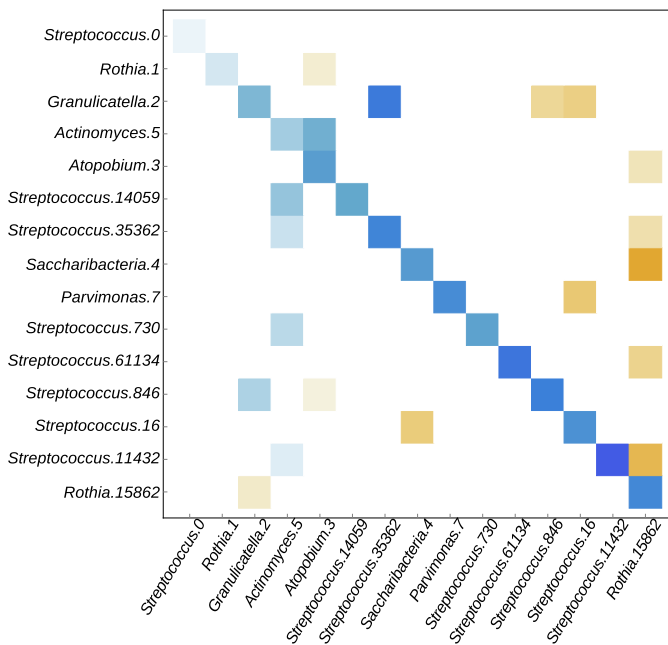

M01

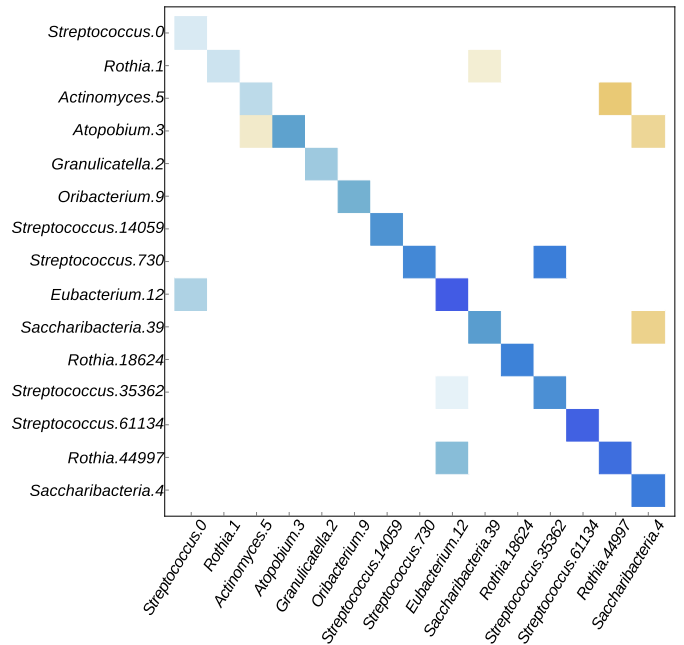

M02

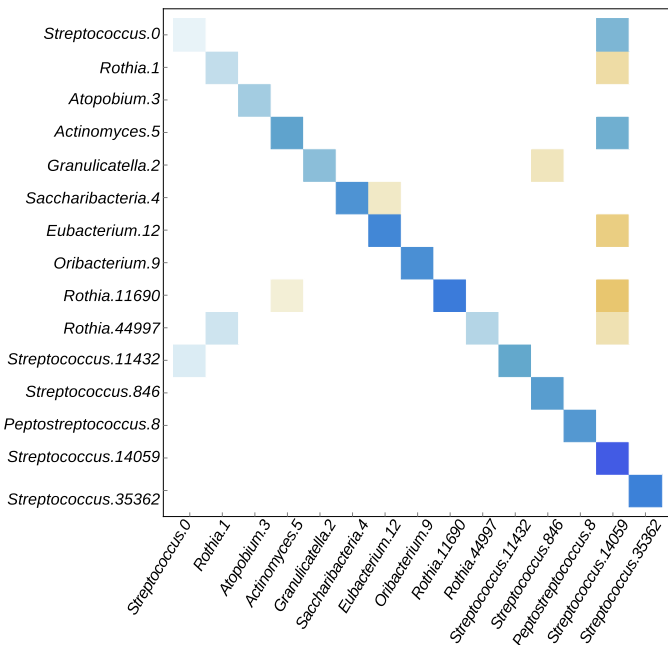

M03

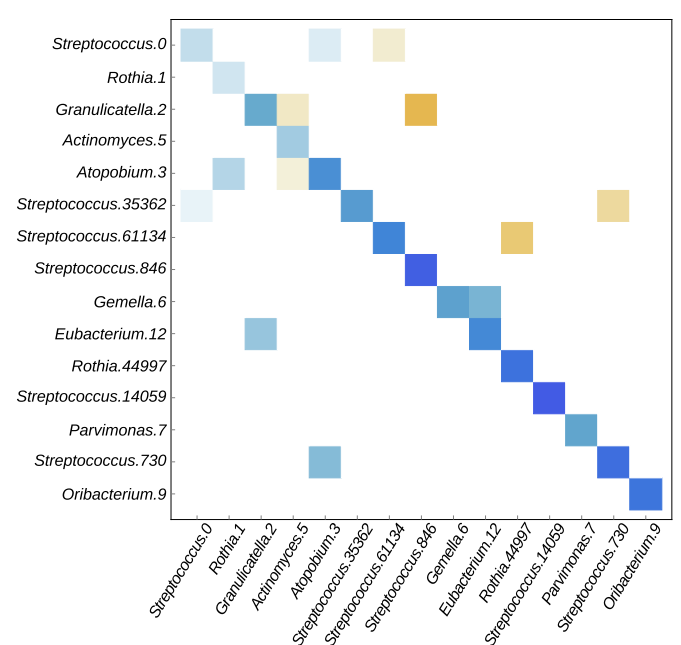

M04

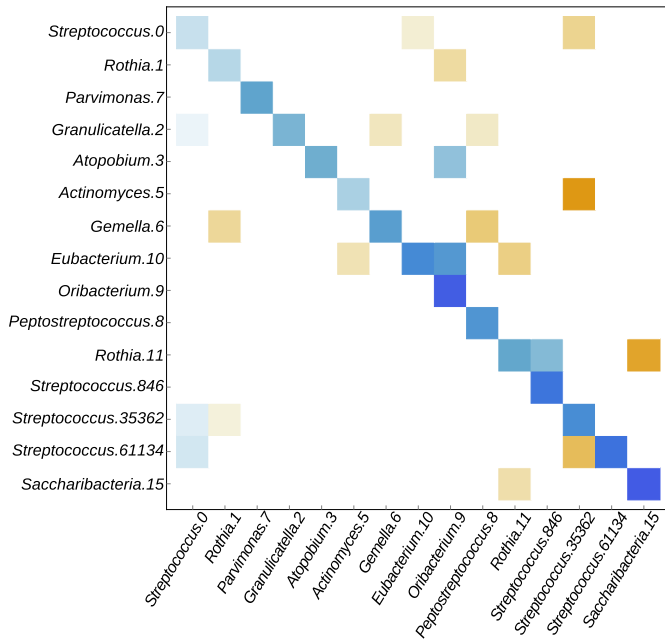

M05

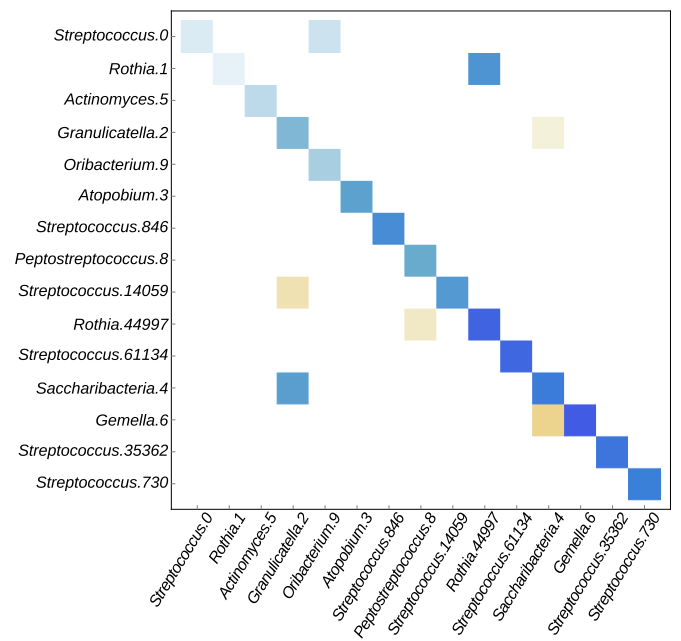

M07

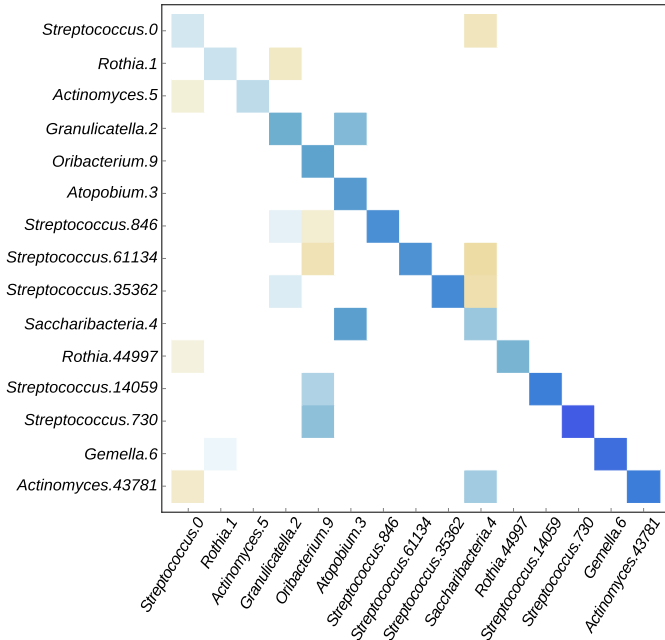

M08

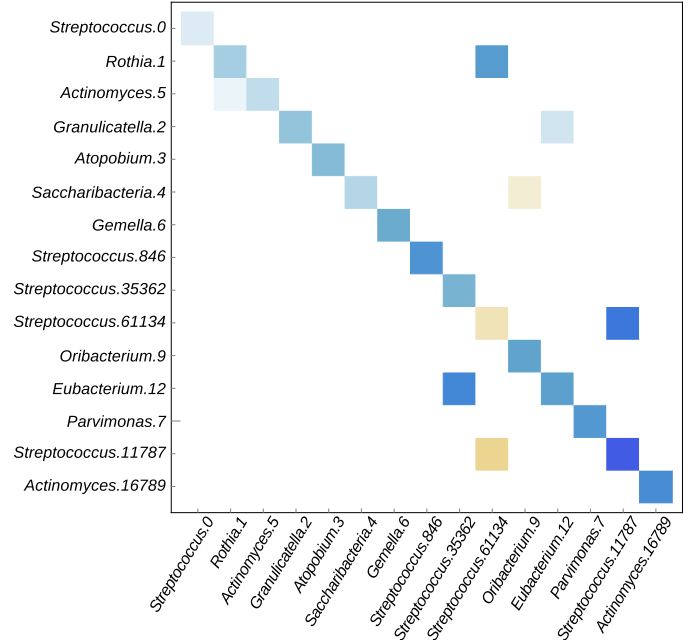

M12

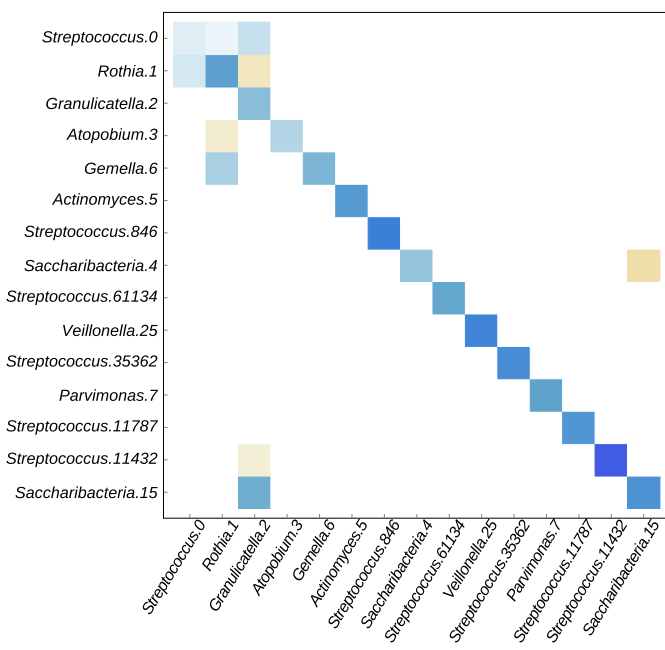

M13

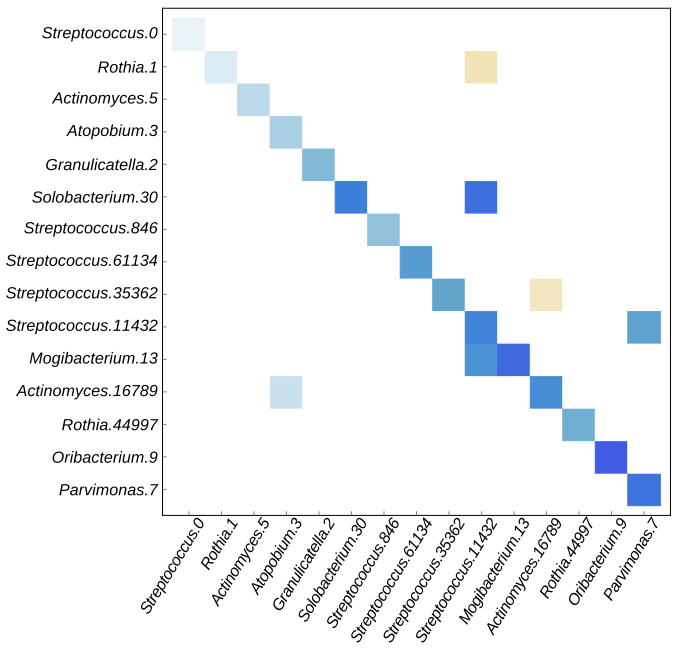

# M19

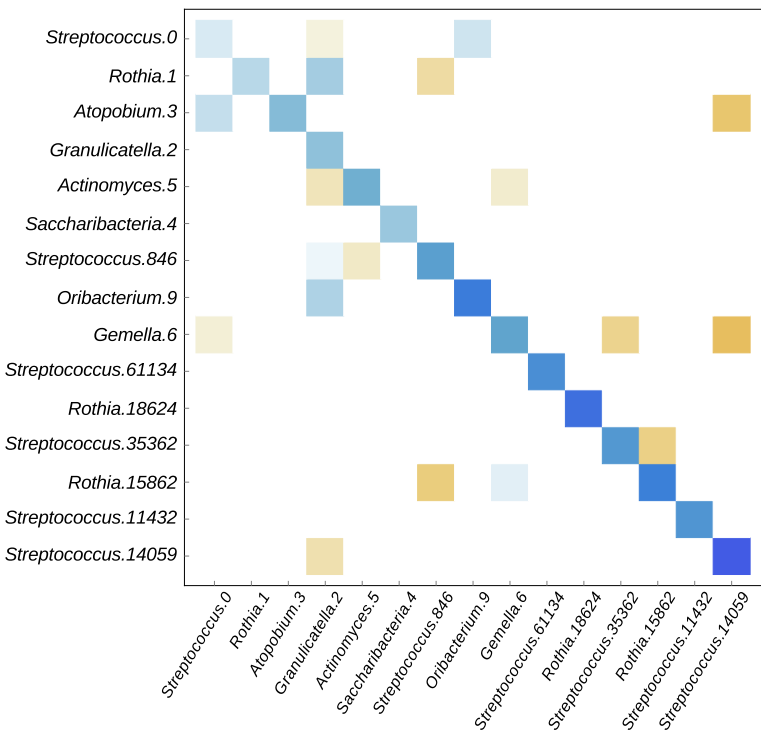

## M20

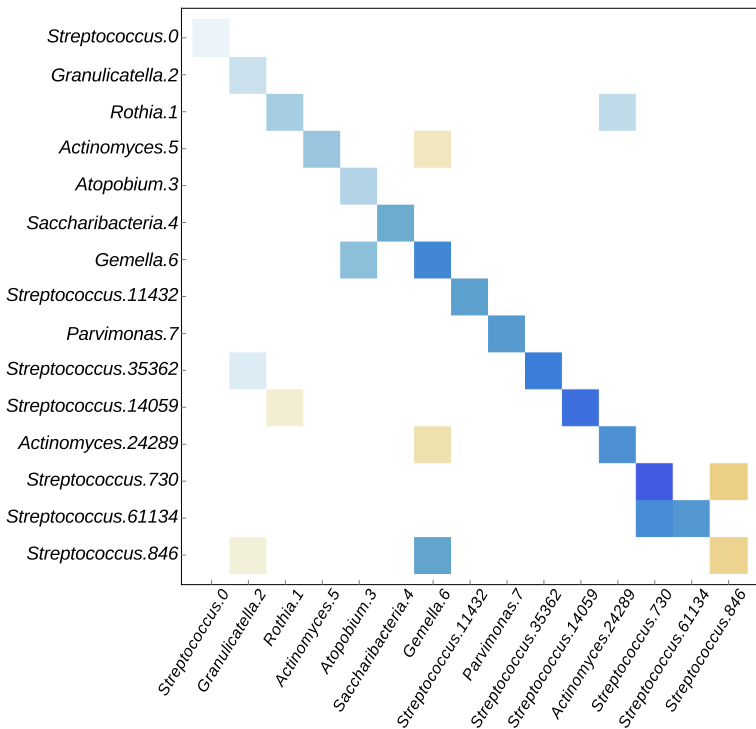

# M21

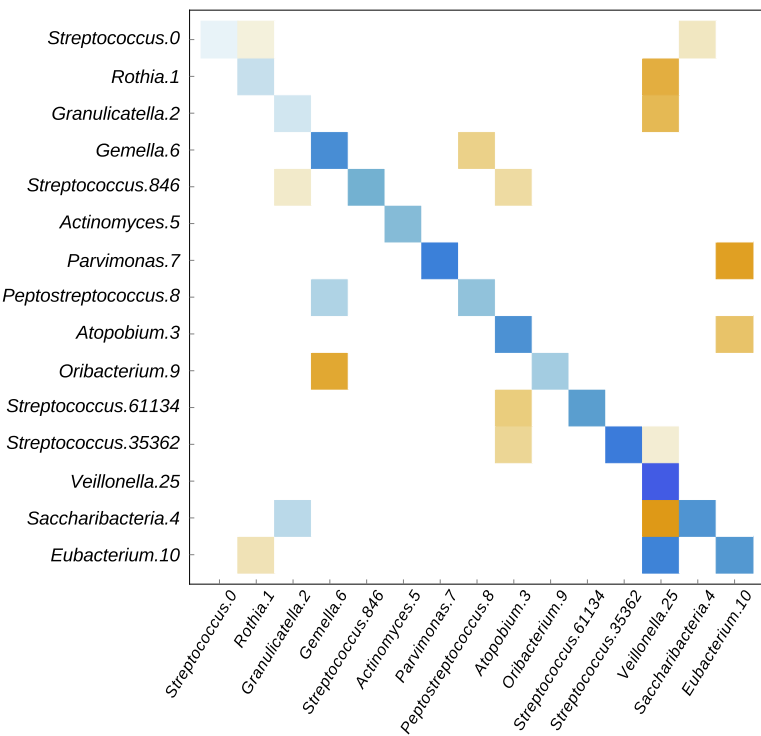

## M25

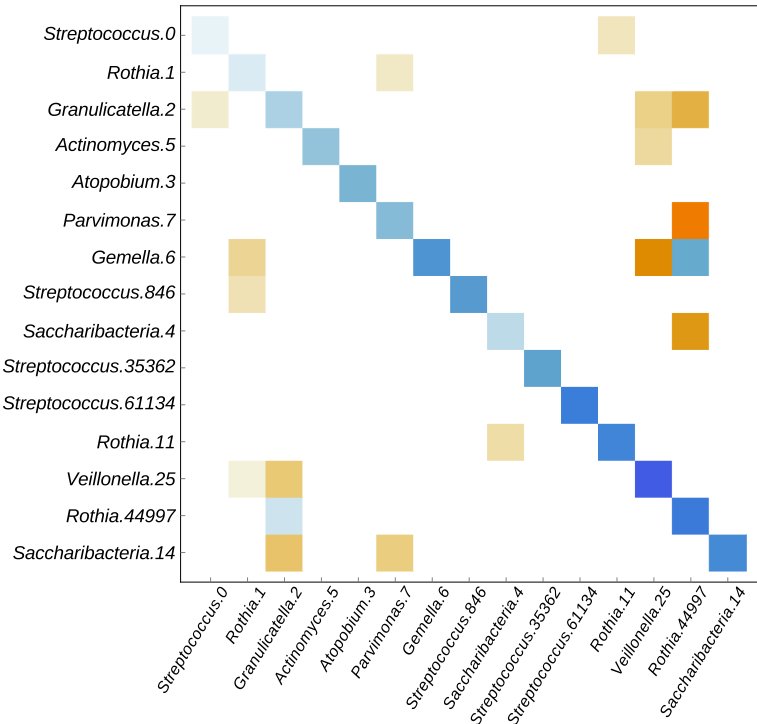

Supplement: Supplementary file 1 — Supplemental Material [file 41522_2018_72_MOESM1_ESM.pdf]
